# Supplementary material for: Certification for vision impairment: researching perceptions, processes and practicalities in health and social care professionals and patients
Source: PubMed Central journal article supplement — BMJ Open. 2014 Apr 8;4(4):e004319. doi: 10.1136/bmjopen-2013-004319 (PMC3987725; doi:10.1136/bmjopen-2013-004319), 2014-04-08
Supplement: bmjopen-2013-004319.draft_revisions.pdf [file bmjopen-2013-004319.draft_revisions.pdf]

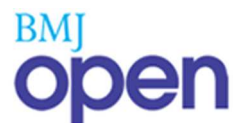

**Certification for vision impairment – perceptions, process  
and practicalities**

|                                    |                                                                                                                                                                                                           |
|------------------------------------|-----------------------------------------------------------------------------------------------------------------------------------------------------------------------------------------------------------|
| Journal:                           | <i>BMJ Open</i>                                                                                                                                                                                           |
| Manuscript ID:                     | bmjopen-2013-004319                                                                                                                                                                                       |
| Article Type:                      | Research                                                                                                                                                                                                  |
| Date Submitted by the Author:      | 23-Oct-2013                                                                                                                                                                                               |
| Complete List of Authors:          | Boyce, Tammy; Imperial College, Medicine<br>Slade, John; RNIB,<br>Simkiss, Phillippa; RNIB, Judd Street<br>rughani, sonal; RNIB, Judd Street<br>Ghanchi, Faruque; Bradford Royal Infirmary, Ophthalmology |
| <b>Primary Subject<br>Heading</b>: | Ophthalmology                                                                                                                                                                                             |
| Secondary Subject Heading:         | Qualitative research, Evidence based practice, Health policy, Medical<br>education and training, Public health                                                                                            |
| Keywords:                          | Health policy < HEALTH SERVICES ADMINISTRATION & MANAGEMENT,<br>Quality in health care < HEALTH SERVICES ADMINISTRATION &<br>MANAGEMENT, OPHTHALMOLOGY, PREVENTIVE MEDICINE, QUALITATIVE<br>RESEARCH      |
|                                    |                                                                                                                                                                                                           |

SCHOLARONE™  
Manuscripts

**Title:**

Certification for vision impairment – perceptions, process and practicalities

**Keywords:**

Blindness; Visually Impaired Persons; Certification of Vision Impairment;

Professional-Patient Relations

**Authors:**

Dr T Boyce (Corresponding)  
Department of Medicine  
Imperial College  
London

30 Victoria Park Rd East  
Cardiff  
CF5 1EH  
<tboyce@imperial.ac.uk>

Mr J Slade  
Royal National Institute of Blind People (RNIB)  
105 Judd Street  
London  
WC1H 9NE  
020 7388 1266

Dr P Simkiss  
RNIB  
105 Judd Street  
London  
WC1H 9NE  
020 7388 1266

Ms S Rughani  
RNIB  
105 Judd Street  
London  
WC1H 9NE  
020 7388 1266

Mr Faruque Ghanchi  
Bradford Teaching Hospitals NHS Foundation Trust  
Duckworth Lane  
Bradford  
BD9 6RJ  
01274 382386

## Abstract

### Objectives

To evaluate the processes for Certification of Vision Impairment, examine the role of ophthalmologists and health and social care professionals in the

### Design

Qualitative.

### Setting

Telephone interviews with health and social care professionals and patients from three sites in England examining experiences of the certification and registration processes.

### Participants

43 health and social care professionals involved in the certification or registration process and 46 patients certified as blind or partially sighted within previous 12 months.

### Results

The process of being certified is separate from being registered for vision impairment. Deciding at what point a patient should be certified can be uncertain and ophthalmologists varied in their comprehension of the certification process. The length of time to complete the certification and registration process varies from a few weeks to many months. The avoidable delays in completion and forwarding of the CVIs to social services can be helped by Eye Clinic Liaison Officers (ECLO).

### Conclusion

Visual function is the key aspect to consider when offering a patient CVI. Being certified with vision impairment is a significant process for patients that can

1  
2 substantially change their lives. Eye Clinic Liaison Officers can improve the  
3  
4 process of being certified and registered.  
5  
6  
7

## 8 **Article summary**

### 9 **Strengths and limitations of this study**

- 10  
11  
12  
13 • This is the first study to study those involved in the certification and  
14 registration processes, including health and social care professionals and  
15 patients.  
16  
17  
18
- 19  
20  
21 • The number of participants was small, so findings should be considered  
22 indicative, however repetition levels were reached in all three interview  
23 groups suggesting confidence in the findings.  
24  
25  
26
- 27  
28 • Further research is needed to understand the impact of new Disability  
29 Living Allowance assessment policies and whether there is any pressure  
30 on ophthalmologists not to certify patients and explore patients who are  
31 eligible but not certified.  
32  
33  
34  
35  
36  
37  
38  
39  
40  
41  
42  
43  
44  
45  
46  
47  
48  
49  
50  
51  
52  
53  
54  
55  
56  
57  
58  
59  
60

## Introduction

The Certificate of Vision Impairment (CVI) was introduced in England in September 2005 and in Wales in April 2007. Its purpose is to provide a reliable route for someone with sight loss to be brought to the attention of social care. Certification and registration are two separate processes: an ophthalmologist completes the CVI based on existing visual function criteria and support needs. Patients can be certified as sight impaired (SI – formerly ‘partial sighted’) or severe sight impairment (SSI- formerly ‘blind’). Local Social Service Department (SSDs) then initiate the registration process upon receipt of the completed CVI. Registration is a voluntary choice, as such, SSDs ask patients if they would like to be registered.

There has been an inconsistent decline in both the number of certifications and number of registrations in many areas of England, though the ageing population would suggest an increase in certifications.<sup>(1)</sup> There is also concern that the number of CVIs is as accurate as possible as the Public Health Outcomes Framework in England, introduced in 2013, includes an indicator for preventable sight loss for the first time. The indicator aims to better target financial resources to improve early detection of the three major causes of sight loss (glaucoma, age related macular degeneration (AMD) and diabetic retinopathy).<sup>(2)</sup> As the CVI includes causes of vision impairment, it will provide a metric for levels of avoidable sight loss for the indicator. It is therefore important that the number and information in CVIs and subsequent registrations reflect accurate levels of need.

1  
2 This paper examines the certification processes in hospitals and identifies the  
3  
4 main barriers, delays and enablers with particular emphasis on the role of  
5  
6 ophthalmologists. It also explores the significance of certification for patients.  
7  
8  
9

## 10 **Materials and Methods**

### 11 **Sample**

12  
13  
14  
15  
16  
17 A qualitative study was designed based on semi-structured telephone interviews  
18  
19 of clinical and social care providers and service users.<sup>(3)(4)</sup> The study was  
20  
21 undertaken at three separate areas of England identified as having inconsistent  
22  
23 CVI registration rates between 2006 and 2011. NHS research ethics approval  
24  
25 was secured for each hospital site. 43 health and social care professionals and  
26  
27 46 patients were interviewed by an experienced interviewer (See Table 1).  
28  
29 These interviewed included; ophthalmologists (12), ECLOs (4), Nurses (3),  
30  
31 Optometrists (4) and Administrators (8). All ophthalmologists interviewed were  
32  
33 consultants except one trainee registrar. Of the eleven consultants interviewed,  
34  
35 two were qualified for less than two years; the remaining nine consultants were  
36  
37 qualified for over ten years. Hospital interviewees were identified by their head  
38  
39 of department. Social care interviewees were identified by ECLOs and a  
40  
41 representative from the London Visual Impairment Forum.  
42  
43  
44  
45  
46  
47

48 Patients with vision impairment (and two primary carers) were interviewed.  
49  
50 Patients were identified by ECLOs or social services. As patients' recollections  
51  
52 of medical consultations can be poor within relatively short periods after a  
53  
54 consultation,<sup>(5)</sup> only patients certified within the last year were interviewed.  
55  
56 Interviewees included patients certified and registered and those only certified.  
57  
58  
59  
60

1  
2 A sampling frame was created to direct patient recruitment. The sample frame  
3  
4 aimed to ensure age, ethnicity, gender and income variation.  
5  
6

7  
8 One fifth (n=11) of patients identified as Asian/Black and 41% stated they had  
9  
10 an income below £15,000/annum. 63% were over 60 years of age and 26 out of  
11  
12 46 interviews were with women.  
13

### 14 15 **Interviews and Data Analysis**

16  
17 Telephone interviews were arranged with individual participant's agreement at a  
18  
19 time that suited the interviewees. Interviews lasted on average for 15 minutes,  
20  
21 although some were substantially longer (Patients range 8-40 minutes,  
22  
23 health/social care professionals range 6-50 minutes). The interviews were  
24  
25 based on semi-structured questions that were predefined by the consensus of  
26  
27 the research team. Interview questions included descriptions of their role in the  
28  
29 certification process (See Box 1-3).  
30  
31  
32  
33  
34

35 CVI process / when you recommend certification  
36 Purpose of CVI  
37 What you tell patients about CVI  
38 Barriers to approaching patients  
39 Length to complete CVI  
40 Knowledge of benefits of being certified  
41 Reasons for decline  
42 Improvements  
43

44 Box 1: Themes in ophthalmology/optometrist/nurse questions  
45

46 CVI process  
47 Length from receiving CVI to sending to social services  
48 Purpose of CVI  
49 Improvements  
50

51 Box 2: Themes in administrators/ ECLO questions  
52

53 Experiences of being certified and registered, length to complete  
54 Access to support before certification  
55

56 Box 3: Themes in patient questions  
57  
58  
59  
60

1  
2 Interview questions acted as a guide and additional information was also  
3  
4 gleaned.  
5  
6  
7

8  
9 All interviews were recorded, transcribed and analysed using thematic analysis.  
10  
11 A list of deductive codes was initially created; inductive codes emerged during  
12  
13 the second level of the thematic analysis.<sup>(6,7,8)</sup>  
14  
15

16  
17  
18 The interviewees are described using a number and labels – patient (Pat),  
19  
20 ophthalmologist (Oph), secretaries and administrators (Adm) and social services  
21  
22 staff- managers, rehabilitation officers, administrators (SS).  
23  
24

25  
26  
27 It was observed that the terms ‘certification’ and ‘registration’ were used  
28  
29 incorrectly and inconsistently by most interviewees hence these terms were  
30  
31 amended in the text to provide clarity. In addition, the term ‘patient’ is used  
32  
33 throughout the report instead of ‘client’ or ‘service user’. This is for continuity  
34  
35 and clarity.  
36  
37

## 38 **Results**

39  
40  
41 There were subtle differences in process for certification in the three areas and  
42  
43 the clinicians differed in the timing of offer of certification to the patients. The  
44  
45 difference was not so much a geographic trend but related to individual  
46  
47 clinician’s approach. It was not possible to conclude in this research if  
48  
49 differences in certification processes are due to systematic issues or individual  
50  
51 practices.  
52  
53  
54  
55  
56  
57  
58  
59  
60



1  
2 A significant difference between hospitals was the length of time for CVIs to be  
3 sent to SSDs. Within each of the three geographic areas studied social services  
4 responded that it took from one week to many months for CVIs to be sent to  
5  
6  
7  
8  
9 them:

10  
11  
12  
13 'Between 10 days and three or four months.' (SS2)

14  
15 'Some received few days later, others take 3 months.' (SS4)

16  
17  
18  
19  
20 Delays also occur as incomplete CVIs are sent to SSDs. One SS interviewee  
21 estimated half of the CVIs they receive have the wrong or no telephone number  
22 and this delayed the C&R process;  
23  
24

25  
26 'The standard of completion of CVIs is extraordinarily poor... You  
27 have to tick whether SSI or SI, quite regularly they'll have ticked  
28 the wrong box.' (SS11)  
29  
30  
31  
32  
33  
34

35 An additional practice that unnecessarily delays sending certifications to SS is  
36 waiting to send CVIs in batches. All SS staff (n=12) stated they received CVIs  
37 in batches.  
38  
39  
40  
41

42  
43 In each of the three areas, patients confirmed the length of time for them to go  
44 through both C&R varied from a few weeks to close to one year. There was  
45 also variation within each department, with some patients stating C&R took a  
46 few weeks whilst others stated it took many months.  
47  
48  
49  
50  
51

52  
53  
54 The eye clinics differed in their approach to use of the ECLO service for  
55 certification and registration process. ECLOs helped complete the CVI in two  
56 areas, however one factor that contributed to the inconsistent certification  
57  
58  
59  
60

1  
2 process in hospitals was ophthalmologists' attitudes towards ECLOs. All four  
3  
4 ECLOs said ophthalmologists used them inconsistently. One consultant  
5  
6 agreed;  
7

8  
9  
10  
11 'At the moment I keep forgetting (laughs). I'm meant to send to  
12  
13 ECLO...He's not here for all of my clinics.' (Oph1)  
14

15  
16  
17 Three quarters of the ophthalmologists (N=9) agreed it would be cost-effective  
18  
19 and would be better use of their time if ECLOs helped to complete the CVI (Part  
20  
21 3) and participate in the certification process;  
22  
23

24  
25  
26 'I'm fairly senseless when it comes to a list of benefits they are  
27  
28 entitled to, I think the ECLO is brilliant at explaining the other benefits  
29  
30 like tax, entitled to this and that, parking.' (Oph9)  
31

32  
33 '(Completing CVI) does eat into clinic time, someone else can do it.'  
34  
35 (Oph2)  
36

37  
38  
39 The interviewed ophthalmologists identified difficulties in subjective  
40  
41 interpretation of visual field defect and fluctuating visual function as potential  
42  
43 reasons why the offer of certification may be delayed.  
44  
45  
46

47  
48  
49 'The whole issue itself is subjective... It depends on the clinician,  
50  
51 assessing the visual field and interpreting that.' (Oph10)  
52  
53  
54  
55  
56  
57  
58  
59  
60

1  
2 One ophthalmologist described the difficulty of certifying people with AMD, as  
3  
4 with recent antiVEGF treatments visual improvement may be possible, and  
5  
6 fluctuating visual acuity levels can influence certification process.  
7  
8

9  
10  
11 'People with AMD with injections go up and down like a yo-yo.

12  
13 Once they have reached certifiable level, a lot of time we couldn't  
14  
15 do anything and historically we would have offered certification.  
16

17  
18 Now they will have a few more injections, they get a little better.'

19  
20 (Oph11)  
21  
22  
23

24 Similarly, some of the Consultants responded highlighting that similar issues in  
25  
26 certifying patients with other eye conditions for example for patients with diabetic  
27  
28 retinopathy<sup>(9)</sup>.  
29

30  
31 'We know with diabetics when you've got some degree of visual  
32  
33 impairment you've also got peripheral field changes because of  
34  
35 the diabetic retinopathy and the lasering - there's a whole mass  
36  
37 of grey area in there.' (Oph6)  
38  
39  
40  
41

42 Most ophthalmologists stated they based their decisions on when to offer  
43  
44 certification on visual acuity: many did not consider a patient's functionality or  
45  
46 the level of support a patient might need. Half of the ophthalmologists (n=6)  
47  
48 admitted they relied only on quantitative visual function (acuity or field) when  
49  
50 deciding whether or not to offer certification, they did not consider a patients'  
51  
52 support needs.  
53  
54  
55  
56  
57  
58  
59  
60

1  
2 'making the decision, use visual acuity, based on visual fields, and then  
3  
4 work out if eligible (Interviewer: Do you think about support at home?)  
5  
6 You decide whether or not they are eligible and whether or not it will be of  
7  
8 benefit for them is a separate issue.' (Oph8)  
9

10  
11  
12 Some of the ophthalmologists (n=4) took account of a patient's practical visual  
13  
14 needs when considering to offer certification.  
15  
16

17  
18  
19 '(If patients) highlight particular problems they are  
20  
21 having...problems with seeing dials for thermostats, looking for  
22  
23 instructions for things, could do with help regarding lighting even,  
24  
25 if they ever talk about safety issues like gas fires or cookers or  
26  
27 have burnt themselves I tend to worry more about safety...I think  
28  
29 of offering low vision support as a package.' (Oph1)  
30  
31  
32  
33  
34

35 Similar to the majority of the ophthalmologists, all three nurses interviewed  
36  
37 stated that visual function was a primary factor in their decision whether to  
38  
39 recommend certification.  
40  
41  
42

43  
44 Consultants appeared more likely to offer certification at the end of their  
45  
46 treatment, they (n=5) often described how they regard certification as the 'final  
47  
48 stage' in the management of the eye condition;  
49

50  
51 'I think in practice (certification) does tend to coincide with an  
52  
53 acknowledgement that there's little more that we can offer them  
54  
55 medically...Certification can often form part of a process towards  
56  
57 the end of a period of medical care and so it often coincides with  
58  
59  
60

1  
2 their discharge from hospital or their discharge from a period of  
3  
4 follow-up.' (Oph5)  
5  
6

7  
8 In contrast, patients very much regarded certification as a significant point in  
9  
10 their treatment, stating it was the beginning of a stage of acceptance of their  
11  
12 sight loss. The offer of certification was emotionally overwhelming for almost  
13  
14 every patient interviewed (n=41); the help they received at this time vastly  
15  
16 improved the quality of their lives.  
17

18  
19  
20  
21 Interviewer: 'Has registration helped you?'

22  
23 Pat26: 'Absolutely, 100%.'  
24  
25

26  
27  
28 The practical assistance that resulted from certified and registered was  
29  
30 valued most by patients;  
31

32  
33  
34 'I faced my fear thinking I'd never walk in the dark anymore and  
35  
36 thanks to (SS), they've trained me to walk in the dark.' (Pat14)  
37  
38

39  
40  
41 '(SS) issued me with bus pass, made me more mobile, fold up  
42  
43 white stick, recognition stick, helps an immense amount.' (Pat31)  
44  
45

## 46 Discussion

47  
48 The aim of this research was to examine the inconsistent decline in the number  
49  
50 of certifications issued since the CVI was introduced in England in September  
51  
52 2005. Despite the ageing population and predicted increases in those with sight  
53  
54 loss<sup>(10)</sup>, there has been an inconsistent decline in both the number of  
55  
56 certifications and number of registrations. Between 2010/11 and 2011/12 there  
57  
58  
59  
60

1  
2 was a 4% *increase* in the number of certifications in England<sup>(10)</sup> In contrast,  
3  
4 between 2008/09 and 2009/10 there was a 5% *decrease* in the number of  
5  
6 certifications.<sup>(11)</sup>  
7

8  
9  
10 In addition the decline in new blind registrations at regional level reveals wide  
11  
12 variations in the numbers registered.<sup>(12)</sup> The largest decline in new  
13  
14 registrations was observed in the East Midlands, where new blind registrations  
15  
16 decreased by 52%, while the smallest decline was in the North East - only 10%  
17  
18 (See Figure 1).<sup>(12)</sup> Even in small geographical areas the number of CVIs and  
19  
20 associated registrations varied widely, e.g. in inner London new registrations fell  
21  
22 by 41% whereas in outer London the decrease was 24%.<sup>(12)</sup> Reasons for the  
23  
24 inconsistent declines in certifications and registrations are poorly understood.<sup>(13)</sup>  
25  
26  
27  
28  
29

30  
31 Interviews with ophthalmologists revealed they are often uncertain as to when to  
32  
33 offer certification. For some patients it is clearly evident when their eye sight  
34  
35 has reached the point to be certified but for others deciding when to certify is  
36  
37 more ambiguous. Research finds higher under-registration in patients with  
38  
39 treatable disease compared to those with untreatable disease.<sup>(14)</sup> The  
40  
41 uncertainty of when to certify was also an issue for other eye conditions<sup>(9)</sup> For  
42  
43 example, certifying patients with atrophic AMD also presents significant timing  
44  
45 difficulties.<sup>(15)</sup> These patients often experience severe sight loss after discharge  
46  
47 but need to be referred back into the hospital eye service for certification when  
48  
49 their vision declines. Introducing these patients to the ECLO/social services  
50  
51 team before they are discharged will improve their access to relevant support  
52  
53 services.  
54  
55  
56  
57  
58  
59  
60

1  
2 In addition, some ophthalmologists are unclear of the purpose of certification  
3  
4 which may affect when they offer it. Consultants may delay certifying patients as  
5  
6 they regard certification as the *end of a clinical process* and wait to certify  
7  
8 patients until they think they cannot offer any further medical treatments.  
9

10  
11 Related to the issue of *when* to offer certification is the reason for offering it: the  
12  
13 purpose of certification is to provide access to support for patients.<sup>(16)</sup>  
14

15  
16 Certification and registration are not simply medical processes but a significant  
17  
18 step in patients' adjusting and accepting of their sight-loss. Interviews with  
19  
20 patients revealed the issuing of certification is often viewed as the beginning of  
21  
22 a new phase and a gateway to much needed support. In contrast, many  
23  
24 ophthalmologists regard certification as the end of the process but this attitude  
25  
26 can lead to patients needing support left without it. Of the 46 patients  
27  
28 interviewed, 20 stated they would have liked to have been offered certification  
29  
30 earlier, to access support.  
31  
32

33  
34  
35 There was variation in the certification process in each of the three areas and  
36  
37 the process used by each consultant differed within hospitals. The DH  
38  
39 recommends the CVI be sent to the local social services department "within five  
40  
41 working days".<sup>(17)</sup> Across the three areas, interviews with hospital and social  
42  
43 services staff and patients revealed that only very rarely were CVIs sent to  
44  
45 SSDs within five days. It was much more common for CVIs to take weeks or  
46  
47 months to be sent. Previous research also found that delays often occur when  
48  
49 CVIs are sent to SSDs.<sup>(18)</sup> Each administrator (n=8) confirmed consultants can  
50  
51 'take a while' to return the CVI to their office. Another significant delay is sending  
52  
53 incomplete CVIs to SSDs; an unnecessary delay for patients waiting for support.  
54  
55  
56  
57  
58  
59  
60

1  
2 These practices lengthen the C&R process, making it more complicated and  
3  
4 fraught for patients. In each of the three areas studied, there were examples of  
5  
6 good and bad practice and stories of both grateful and frustrated patients, thus a  
7  
8 good certification process is achievable in each department.  
9

10  
11  
12  
13 A more holistic approach to eye health is needed; health professionals,  
14  
15 including registrars, ophthalmologists, optometrists and medical secretaries  
16  
17 should improve their awareness of when certification should be offered and how  
18  
19 certification benefits patients.<sup>(9)</sup> Any additional time needed for CVI discussion in  
20  
21 clinic may not be readily available due to pressures on quantity (meeting  
22  
23 Referral to Treatment and other performance targets), therefore departments  
24  
25 should explore if others, such as optometrists or ECLOs, are better placed to  
26  
27 complete parts of the CVI. It should also be considered who is best placed to  
28  
29 send completed CVIs quickly - ECLOs or secretaries or a designated  
30  
31 administrator/team.  
32  
33  
34  
35  
36  
37  
38  
39

## 40 Discussion

41  
42 The certification of vision impairment is inconsistently offered by  
43  
44 ophthalmologists. The uncertainty of when to certify may be contributing to the  
45  
46 decline in certifications. Many ophthalmologists regard certification as the end  
47  
48 of a process instead of regarding it as a formal route to support.  
49  
50  
51  
52  
53

54 Patients have both positive and negative experiences of certification. When the  
55  
56 C&R processes 'work', patients access support within weeks, however often  
57  
58  
59  
60



1  
2 patients with vision impairment need and wish to access support before they are  
3  
4 offered certification.  
5  
6

7  
8  
9 ECLOs play an important role in improving the C&R process, by making it more  
10  
11 efficient and improving the process for consultants. Ophthalmologists may wish  
12  
13 to consider their role beyond clinical care and utilise their skills better to offer the  
14  
15 appropriate support to their patients. Certification changes patients' lives;  
16  
17 ophthalmologists should acknowledge the significant role they play in helping  
18  
19 patients access support and improve their quality of life.  
20  
21

22  
23  
24  
25  
26  
27 TB wrote the initial draft. All authors revised the initial draft, FG revised the  
28  
29 subsequent drafts. TB wrote the final draft. TB is the guarantor. All authors  
30  
31 have full control of the content of the article.  
32  
33  
34  
35  
36  
37  
38  
39  
40  
41  
42  
43  
44  
45  
46  
47  
48  
49  
50  
51  
52  
53  
54  
55  
56  
57  
58  
59  
60

**Contributorship Statement**

B wrote the initial draft. All authors revised the initial draft, FG revised the subsequent drafts. TB wrote the final draft. TB is the guarantor. All authors have full control of the content of the article.

**Acknowledgements:**

Many thanks to the health professionals, representatives from social services and patients who participated in the interviews and took great courage in providing honest feedback on their experiences of the C&R process. Many thanks to the advisory group who provided guidance and advice.

**Competing interests:**

None.

**Funding statement**

The Royal National Institute of Blind People funded this research. The funders contributed to the design of the research.

## References

- 1 RNIB. *Sight loss UK 2012 - The latest evidence*. RNIB, 2012.  
2  
3  
4  
5  
6 [http://www.rnib.org.uk/aboutus/Research/reports/otherresearch/Pages/sight\\_loss\\_uk.aspx](http://www.rnib.org.uk/aboutus/Research/reports/otherresearch/Pages/sight_loss_uk.aspx) (accessed 7 July 2013)  
7  
8  
9
- 10 2 Department of Health. *Public Health Outcomes Framework 2013 to 2016 and*  
11 *technical updates*. DH, 2013. <https://www.gov.uk/government/news/public-health-outcomes-framework-sets-out-desired-outcomes-and-supporting-transparency> (accessed 7 July 2013).  
12  
13  
14  
15  
16  
17  
18
- 19 3 Boyce T. *The Certification and Registration Processes: Stages, barriers and*  
20 *delays*. RNIB, 2012.  
21  
22 [http://www.rnib.org.uk/aboutus/Research/reports/otherresearch/Pages/certification\\_registration\\_processes.aspx](http://www.rnib.org.uk/aboutus/Research/reports/otherresearch/Pages/certification_registration_processes.aspx) (accessed 7 July 2013).  
23  
24  
25  
26  
27
- 28 4 Britten N. Qualitative interviews in medical research. *BMJ* 1995; **311**:251-3.  
29
- 30 5 McGuire LC. Remembering what the doctor said: Organization and adults -  
31 *memory for medical information*. *Exp. Aging Res* 1996;22:403-428.  
32  
33
- 34 6 Miles MB, Huberman AM. *Qualitative data analysis: An expanded sourcebook*  
35 *(Second Edition)*. London: Sage Publications; 1994.  
36  
37  
38
- 39 7 Morse JM, Field PA. *Qualitative research methods for health professionals*  
40 *(Second Edition)*. London: Sage Publications; 1995.  
41  
42
- 43 8 Maxwell JA. *Qualitative research design. An interactive approach (Second*  
44 *edition)*. London: Sage Publications; 2005.  
45  
46  
47
- 48 9 Barry RJ, Murray PI. Unregistered visual impairment: is registration a failing  
49 *system? Br J Ophthalmol* 2005;89:995e8  
50  
51
- 52 10 Leamon S. *Number of adults and children certified with sight impairment in*  
53 *England and Wales: April 2011-March 2012*. RNIB, 2013.  
54  
55  
56  
57  
58  
59  
60

1  
2 [http://www.rnib.org.uk/aboutus/Research/reports/otherresearch/Pages/sight\\_los](http://www.rnib.org.uk/aboutus/Research/reports/otherresearch/Pages/sight_los)  
3  
4 [s\\_statistics\\_report.aspx](http://www.rnib.org.uk/aboutus/Research/reports/otherresearch/Pages/sight_los) (accessed 7 July 2013).

5  
6 11 Leamon S. *Number of adults and children certified with sight impairment in*  
7  
8 *England and Wales: April 2010-March 2011*. RNIB, 2012.

9  
10 [http://www.rnib.org.uk/aboutus/Research/reports/otherresearch/Pages/sight\\_los](http://www.rnib.org.uk/aboutus/Research/reports/otherresearch/Pages/sight_los)  
11  
12 [s\\_statistics\\_report.aspx](http://www.rnib.org.uk/aboutus/Research/reports/otherresearch/Pages/sight_los) (accessed 7 July 2013)

13  
14 12 Malik ANJ, Bunce C, Wormald R, Suleman M, Stratton I, Muir Gray JA.  
15  
16 Geographical variation in certification rates of blindness and sight impairment in  
17  
18 England, 2008–2009. *BMJ Open*. 2012; 2:e001496. doi:10.1136/bmjopen-2012-  
19  
20 001496.

21  
22 13 Lake R. *A review of information needs and practice relating to people with*  
23  
24 *sensory impairments*. NHS Information Centre, 2010.

25  
26 14 Kotecha A, Fernandes S, Bunce C, Franks WA. Avoidable sight loss from  
27  
28 glaucoma: is it unavoidable? *Br J Ophthalmol* 2012;96:816e820.  
29  
30  
31  
32  
33  
34 doi:10.1136/bjophthalmol-2012-301499

35  
36 15 Rostron E, McKibbin M. Visual impairment certification secondary to ARMD  
37  
38 in Leeds, 2005–2010: is the incidence falling? *Eye* 2012;26:933-936.

39  
40 16 Department of Health. *Guidance published on registering a vision impairment*  
41  
42 *as a disability*. <http://www.dh.gov.uk/health/2013/01/cvil/> (accessed 7 July 2013).

43  
44 17 Health and Social Care Information Centre. *People Registered as Blind and*  
45  
46 *Partially Sighted - England, 2006, Triennial*.

47  
48 <http://www.ic.nhs.uk/article/2021/Website->  
49  
50 [Search?productid=1885&q=blind+partially+sighted+2006&sort=Relevance&size=10](http://www.ic.nhs.uk/article/2021/Website-)  
51  
52 [&page=1&area=both#top](http://www.ic.nhs.uk/article/2021/Website-) (accessed 7 July 2013).

53  
54  
55 18 Bunce C, Smyth L, Xing W, Zekite A (ND) Research into drop in registrations  
56  
57 of blind and partially sighted people. (Available from TB).

1  
2  
3  
4  
5  
6  
7  
8  
9  
10  
11  
12  
13  
14  
15  
16  
17  
18  
19  
20  
21  
22  
23  
24  
25  
26  
27  
28  
29  
30  
31  
32  
33  
34  
35  
36  
37  
38  
39  
40  
41  
42  
43  
44  
45  
46  
47  
48  
49  
50  
51  
52  
53  
54  
55  
56  
57  
58  
59  
60

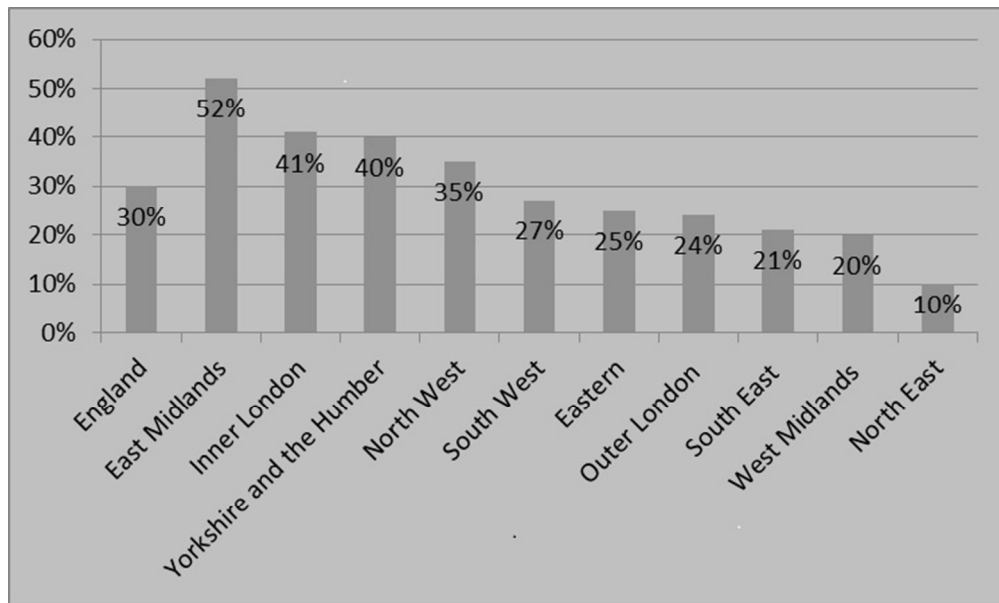

Figure 1: Decrease in new registrations by region 2003-2011(13)  
197x118mm (96 x 96 DPI)

Review only



**Certification for vision impairment – perceptions, process  
and practicalities**

|                                    |                                                                                                                                                                                                                                                                       |
|------------------------------------|-----------------------------------------------------------------------------------------------------------------------------------------------------------------------------------------------------------------------------------------------------------------------|
| Journal:                           | <i>BMJ Open</i>                                                                                                                                                                                                                                                       |
| Manuscript ID:                     | bmjopen-2013-004319.R1                                                                                                                                                                                                                                                |
| Article Type:                      | Research                                                                                                                                                                                                                                                              |
| Date Submitted by the Author:      | 04-Feb-2014                                                                                                                                                                                                                                                           |
| Complete List of Authors:          | Boyce, Tammy; Imperial College, Medicine<br>Leamon, Shaun; Royal National Institute of Blind People,<br>Slade, John; RNIB,<br>Simkiss, Phillippa; RNIB, Judd Street<br>rughani, sonal; RNIB, Judd Street<br>Ghanchi, Faruque; Bradford Royal Infirmary, Ophthalmology |
| <b>Primary Subject<br>Heading</b>: | Ophthalmology                                                                                                                                                                                                                                                         |
| Secondary Subject Heading:         | Qualitative research, Evidence based practice, Health policy, Medical<br>education and training, Public health                                                                                                                                                        |
| Keywords:                          | Health policy < HEALTH SERVICES ADMINISTRATION & MANAGEMENT,<br>Quality in health care < HEALTH SERVICES ADMINISTRATION &<br>MANAGEMENT, OPHTHALMOLOGY, PREVENTIVE MEDICINE, QUALITATIVE<br>RESEARCH                                                                  |
|                                    |                                                                                                                                                                                                                                                                       |

SCHOLARONE™  
Manuscripts

Only

**Title:**

Certification for vision impairment – perceptions, process and practicalities

**Keywords:**

Blindness; Visually Impaired Persons; Certification of Vision Impairment;

Professional-Patient Relations

**Authors:**

Dr T Boyce (Corresponding)  
Department of Medicine  
Imperial College  
London

30 Victoria Park Rd East  
Cardiff  
CF5 1EH  
<tboyce@imperial.ac.uk>

Mr Shaun Leamon  
Royal National Institute of Blind People (RNIB)  
105 Judd Street  
London  
WC1H 9NE  
020 7388 1266

Mr J Slade  
RNIB  
105 Judd Street  
London  
WC1H 9NE  
020 7388 1266

Dr P Simkiss  
RNIB  
105 Judd Street  
London  
WC1H 9NE  
020 7388 1266

Ms S Rughani  
RNIB  
105 Judd Street  
London  
WC1H 9NE  
020 7388 1266

Mr Faruque Ghanchi

1  
2 Bradford Teaching Hospitals NHS Foundation Trust  
3 Duckworth Lane  
4 Bradford  
5 BD9 6RJ  
6 01274 382386  
7  
8  
9

## 10 **Abstract**

### 11 **Objectives**

12 To explore the patient experience , and the role of ophthalmologists and other  
13 health and social care professionals in the certification and registration  
14 processes and examine the main barriers to the timely certification of patients.  
15  
16  
17  
18  
19  
20  
21

### 22 **Design**

23 Qualitative study.  
24  
25

### 26 **Setting**

27 Telephone interviews with health and social care professionals and patients in  
28 three areas in England.  
29  
30  
31  
32

### 33 **Participants**

34 43 health and social care professionals who are part of the certification or  
35 registration process. 46 patients certified as blind or partially sighted within the  
36 previous 12 months.  
37  
38  
39  
40  
41

### 42 **Results**

43 Certification and registration is life changing for patients and the help they  
44 receive can substantially improve their lives. Despite this, ophthalmologists often  
45 found it difficult to ascertain when it is appropriate to certify patients, particularly  
46 for people with long term conditions. Ophthalmologists varied in their  
47 comprehension of the certification process and many regarded certification as  
48 the 'final stage' in treatment. Administrative procedures meant the process of  
49 certification and registration could vary from a few weeks to many months. The  
50  
51  
52  
53  
54  
55  
56  
57  
58  
59  
60



1  
2 avoidable delays in completing certification can be helped by Eye Clinic Liaison  
3  
4 Officers (ECLO).  
5  
6  
7

## 8 **Conclusion**

9  
10 A better understanding of the certification and registration processes can help  
11  
12 drive up standards of support and service provision for blind and partially  
13  
14 sighted people. Better education and support is required for ophthalmologists in  
15  
16 recognising the importance of timely referral for rehabilitative support through  
17  
18 certification and registration. ECLOs can improve the process of certification and  
19  
20 registration. Finally, better education is needed for patients on the benefits of  
21  
22 certification and registration.  
23  
24  
25  
26  
27  
28  
29

## 30 **Article summary**

### 31 **Strengths and limitations of this study**

- 32 • This is the first study to focus on all those involved in the certification and  
33 registration processes – various health and social care professionals as  
34 well as patients.  
35
- 36 • The research design includes areas with differing rates of certification  
37 demonstrating and show the opportunities to improve practice to ensure  
38 the certification process is more consistent.  
39
- 40 • The number of participants was small, so findings should be considered  
41 indicative, however, saturation/repetition levels were reached in all three  
42 interview groups, suggesting confidence in the findings.  
43
- 44 • All patients were certified, further research including this group is needed  
45 to explore why these patients are declining certification.  
46  
47  
48  
49  
50  
51  
52  
53  
54  
55  
56  
57  
58  
59  
60

## Introduction (count 3863)

The Certificate of Vision Impairment (CVI) was introduced in England in September 2005 and in Wales in April 2007. Its purpose is to provide a reliable route for someone with sight loss to be brought to the attention of social care. Certification and registration are two separate processes: an ophthalmologist completes the CVI based on existing visual function criteria and support needs. Patients can be certified as sight impaired (SI – formerly ‘partial sighted’) or severe sight impairment (SSI – formerly ‘blind’) (see Table 1 for an overview of criteria). Local Social Service Department (SSDs) then initiate the registration process upon receipt of the completed CVI. Registration is voluntary; as such, SSDs ask patients if they would like to be registered. When patients are certified as either blind/ SSI or partially sighted/ SI they are eligible for a range of support including: financial concessions (e.g. tax breaks, free NHS sight tests), welfare benefits and the loan of aids and equipment. Data collected by CVI also provides valuable epidemiological information on the prevalence of sight loss.

There is concern that the number of CVIs should be as accurate as possible as the Public Health Outcomes Framework in England, introduced in 2013, includes an indicator for preventable sight loss for the first time. The indicator aims to better target financial resources to improve early detection of the three major causes of sight loss (glaucoma, age related macular degeneration (AMD) and diabetic retinopathy).<sup>(2)</sup> As the CVI includes causes of vision impairment, it will provide a metric for levels of avoidable sight loss for the indicator. It is therefore important that the number and information in CVIs and subsequent registrations reflect accurate levels of need.

1  
2  
3  
4 However, evidence shows the numbers of certifications and registrations have  
5  
6 varied considerably over time and in many cases numbers have declined. This  
7  
8 is in addition to the increasing prevalence of sight loss accompanied by the  
9  
10 ageing population in the UK.<sup>(3)</sup> In the 12-months from April 2008 to March 2009,  
11  
12 the number of certifications was 23,773, a marked increase on the previous 12-  
13  
14 months.<sup>(4)</sup> Certifications then decreased in 2009/2010 and 2010/2011, before  
15  
16 rising to 23,616 in 2011/2012.<sup>(5)</sup> Similarly, the triennial survey of people  
17  
18 registered with Councils with Adult Social Services Responsibilities in England  
19  
20 as being blind or partially sighted showed an overall decreased in new  
21  
22 registrations in 2010/2011 compared with 2008/2009.<sup>(6)</sup>  
23  
24  
25 Perhaps even more noteworthy is the large geographical variation found to exist  
26  
27 in rates of blindness and sight impairment, with an 11-fold difference found to  
28  
29 exist between the highest and lowest rate, according to 2008/2009 data.<sup>(7)</sup>  
30  
31  
32  
33  
34  
35  
36  
37  
38  
39  
40  
41  
42  
43  
44  
45  
46  
47

This paper examines the certification and registration processes in hospitals and  
social services departments and identifies the main barriers, delays and  
enablers. It also explores the significance of certification and registration for  
patients.

## 48 **Materials and Methods**

### 49 **Sample**

50  
51  
52 A qualitative study was designed based on semi-structured telephone interviews  
53  
54 of clinical and social care providers and service users.<sup>(8)</sup> The study was  
55  
56 undertaken in three separate areas of England identified as having fluctuating  
57  
58  
59  
60

1 rates of sight loss certification between 2006 and 2011<sup>(9)</sup>. NHS research ethics  
2 approval was secured for each hospital site. 43 health and social care  
3 professionals and 46 patients were interviewed by an experienced interviewer  
4 (See Table 2). The term 'patient' is used throughout the report instead of 'client'  
5 or 'service user'. This is for continuity and clarity.  
6  
7  
8  
9  
10  
11  
12

13  
14  
15 Hospital and social services staff interviews were with: ophthalmologists,  
16 optometrists and nurses working in ophthalmology departments, social services  
17 rehabilitation officers, social services administrators, Eye Clinic Liaison Officers  
18 (ECLOs) and hospital administration staff (See Table 2). All ophthalmologists  
19 interviewed were consultants except one trainee registrar. Of the eleven  
20 consultants interviewed, two were qualified for less than two years; the  
21 remaining nine consultants were qualified for over ten years. Hospital  
22 interviewees were identified by their head of department. Social care  
23 interviewees were identified by ECLOs and a representative from local visual  
24 impairment forums.  
25  
26  
27  
28  
29  
30  
31  
32  
33  
34  
35  
36  
37  
38  
39

40 Patients with vision impairment (and two primary carers) were interviewed.  
41 Patients were identified by ECLOs or social services. As patients' recollections  
42 of medical consultations can be poor within relatively short periods after a  
43 consultation,<sup>(10)</sup> only patients certified within the last year were interviewed.  
44 Interviewees included patients certified and registered (n = 32), those certified  
45 only (n = 5) and those certified but unsure if they were registered (n = 9). A  
46 sampling frame was created to direct patient recruitment. The sample frame  
47 aimed to ensure a diversity of patients in terms of age, ethnicity, gender and  
48 income.<sup>(11)</sup>  
49  
50  
51  
52  
53  
54  
55  
56  
57  
58  
59  
60

1  
2  
3  
4  
5  
6  
7  
8  
9  
10  
11  
12  
13  
14  
15  
16  
17  
18  
19  
20  
21  
22  
23  
24  
25  
26  
27  
28  
29  
30  
31  
32  
33  
34  
35  
36  
37  
38  
39  
40  
41  
42  
43  
44  
45  
46  
47  
48  
49  
50  
51  
52

Fifteen per cent (n = 7) of patients classified themselves as Asian, seven per cent (n = 3) Black and the remainder White (n = 36). Forty-one per cent (n = 19) stated they had an income below £15,000/annum. Sixty-three per cent (n = 29) of patients were over 60 years of age and fifty-seven per cent (n = 26) were women. Compared to national CVI figures, Black and Minority Ethnic patients were over represented and the gender characteristics of the sample were comparable with national demographics.<sup>(12, 13)</sup>

### 21 Interviews and Data Analysis

22  
23  
24  
25  
26  
27  
28  
29  
30  
31  
32  
33  
34  
35  
36  
37  
38  
39  
40  
41  
42  
43  
44  
45  
46  
47  
48  
49  
50  
51  
52

Semi-structured telephone interviews were conducted with individual participants at a time that suited the interviewees. Interviews lasted on average for 15 minutes; although some were substantially longer (patient interviews ranged from 8-40 minutes, interviews with health/social care professionals ranged from 6-50 minutes). Topics for discussion were predefined by the consensus of the research steering group. Interviews with professionals sought to explore: 1) knowledge and understanding of certification and registration; 2) local pathways and the factors affecting certification and registration; 3) the role of different health and social care professionals; and 4) the future of certification and registration and suggestions for improvement. Interviews with patients explored: 1) experiences of being certified and registered; 2) the impact of certification and registration on the lives of patients and their families; 3) and suggestions for improvement (See Box 1-3).

|                                                |
|------------------------------------------------|
| CVI process / when you recommend certification |
| Purpose of CVI                                 |
| What you tell patients about CVI               |
| Barriers to approaching patients               |
| Length to complete CVI                         |
| Knowledge of benefits of being certified       |

1  
2  
3  
4  
5  
6  
7  
8  
9  
10  
11  
12  
13  
14  
15  
16  
17  
18  
19  
20  
21  
22  
23  
24  
25  
26  
27  
28  
29  
30  
31  
32  
33  
34  
35  
36  
37  
38  
39  
40  
41  
42  
43  
44  
45  
46  
47  
48  
49  
50  
51  
52  
53  
54  
55  
56  
57  
58  
59  
60

|                                     |
|-------------------------------------|
| Reasons for decline<br>Improvements |
|-------------------------------------|

Box 1: Themes in ophthalmology/optometrist/nurse questions

|                                                                                                          |
|----------------------------------------------------------------------------------------------------------|
| CVI process<br>Length from receiving CVI to sending to social services<br>Purpose of CVI<br>Improvements |
|----------------------------------------------------------------------------------------------------------|

Box 2: Themes in administrators/ ECLO questions

|                                                                                                             |
|-------------------------------------------------------------------------------------------------------------|
| Experiences of being certified and registered, length to complete<br>Access to support before certification |
|-------------------------------------------------------------------------------------------------------------|

Box 3: Themes in patient questions

Interview questions acted as a guide and additional information was also gleaned.

All interviews were recorded, transcribed and analysed using thematic analysis.

A list of deductive codes was initially created; inductive codes emerged during the second level of the thematic analysis.<sup>(14,15,16)</sup>

The findings are illustrated with extracts from the interviews. Extracts are referenced with the type of interviewee and interview number – patient (Pat); ophthalmologist (Ophth); secretary/administrator (Adm); nurse (Nur); optometrist (Optom); Eye Clinic Liaison Officer (ECLO) social services staff (managers, rehabilitation officers, administrators) (SS).

It was observed that the terms 'certification' and 'registration' were used incorrectly and inconsistently by most interviewees; hence these terms were amended in the text to provide clarity.

## Results

The research findings are grouped into overarching themes. Despite the differences in size, location and demography of the three areas, there was considerable consistency in the findings. There were, however, local variations in the certification and registration processes.

### Knowledge and awareness of the purpose and benefits of certification and registration

Many health professionals were poorly informed about the purpose and benefits of certification and registration. Almost every health professional was unaware there was a difference between certification and registration. The terms 'certified' and 'registered' were interchanged throughout all interviews. Most health professionals assumed registration happened automatically once a patient was certified at the hospital.

'That's really weird. I thought if we certified the patients we automatically registered them with social services. I'm really surprised to hear that.' (Nur2)

Consequently, only a small number of health professionals were aware of what SSDs offered to certified and registered patients;

'(SS provide) enormous echelons of help, home visits, advice about lighting, advice about managing in home when you've got visual impairment, enormous levels of support that you don't need to be registered to get that support. Great to have ECLO to access this cause that's their expertise.' (Ophth6)

## Uncertainty when to certify the patient

The point at which certification was offered to patients varied between clinicians. The difference was less a geographic trend and more related to the individual clinician's approach.

Ophthalmologists identified difficulties in subjective interpretation of visual field defect and fluctuating visual function as potential reasons why the offer of certification may be inconsistent or delayed. Ophthalmologists also highlighted the impact of recent advancements in treatment on the decision of when to certify a patient.

'The whole issue itself is subjective... It depends on the clinician, assessing the visual field and interpreting that.' (Oph10)

'People with AMD with injections go up and down... Once they have reached certifiable level, a lot of time we couldn't do anything and historically we would have offered certification. Now they will have a few more injections, they get a little better.'

(Oph11)

Most ophthalmologists stated that they based their decisions on *when* to offer certification primarily on visual acuity; they did not consider the patient's functionality or the level of support they might need. Half of the ophthalmologists (n=6) reported relying solely on quantitative visual function (i.e. acuity or visual field).



1  
2  
3 In contrast, almost all optometrists and nurses interviewed considered a  
4  
5 patient's functionality when deciding whether or not to recommend certification;  
6  
7

8  
9 'I don't look at it from the medical point of view rather from the  
10  
11 social point of view. I do try to ask everybody who would fit the  
12  
13 criteria and I probably try to engage more the people maybe I  
14  
15 think would benefit from being registered, someone by  
16  
17 themselves, could do with help from social services.' (Nur2)  
18  
19

### 20 21 22 **Certification as the end of the process, not a route to services** 23

24  
25 Approximately half of the ophthalmologists (n=5) regarded certification as the  
26  
27 'final stage' in the management of a patient's condition, only offered to the  
28  
29 patient at the *end* of their treatment.  
30  
31

32  
33 'I think in practice (certification) does tend to coincide with an  
34  
35 acknowledgement that there's little more that we can offer them  
36  
37 medically...Certification can often form part of a process towards  
38  
39 the end of a period of medical care and so it often coincides with  
40  
41 their discharge from hospital or their discharge from a period of  
42  
43 follow-up.' (Oph5).  
44  
45  
46  
47  
48

49  
50 In contrast, patients very much regarded certification as a significant point in  
51  
52 their treatment, stating it was the beginning of a stage of acceptance of their  
53  
54 sight loss. The offer of certification was emotionally overwhelming for almost  
55  
56 every patient interviewed (n=41); the help they received at this time vastly  
57  
58 improved the quality of their lives.  
59  
60

1  
2  
3  
4 Interviewer: 'Has registration helped you?'

5  
6 'Absolutely, 100%.' (Pat26)  
7  
8  
9

### 10 **Administrative barriers to certification and registration**

11  
12 The length of time to complete the certification and registration process varied  
13 within each area and across the three sites. Patients reported the length of time  
14 for them to go through certification and registration ranged from a few weeks to  
15 close to one year.  
16  
17  
18  
19  
20  
21  
22  
23

24  
25 'It took quite a while, and for (hospital) to send out information  
26 like CVI and all that.' (Pat25)  
27  
28  
29

30  
31  
32 'SS was a long time getting the information from the hospital...My  
33 son and daughter- in-law called them because no one contacted  
34 us.' (Pat26)  
35  
36  
37  
38  
39

40  
41 Social services staff also reported variability in the length of time it took for CVIs  
42 to be sent to them, a finding confirmed by hospital administrative staff. Hospital  
43 workload and delays in obtaining authorisation for the CVI were cited as key  
44 barriers.  
45  
46  
47  
48  
49

50  
51  
52 'Sometimes (CVIs) are there for a while, sometimes varies.

53  
54 Another consultant who gets a lot, he has a quick turnaround, he  
55 fills out the bulk of them, get one day and then a day or two after  
56  
57  
58  
59  
60

1  
2 that...Can sit on desks longer if they are away, week or a bit  
3  
4 longer.' (Adm4)  
5  
6  
7

8  
9 Delays also occurred as a result of incomplete CVIs being sent to SSDs. One  
10  
11 SS interviewee estimated half of the CVIs they receive have an incorrect or  
12  
13 missing telephone number and this delayed the registration process.  
14

15  
16  
17 'The ophthalmologist hasn't indicated whether the patient is  
18  
19 considered SI or SSI or has omitted to sign it or a page could be  
20  
21 missing altogether. When this happens we have to send the CVI  
22  
23 back with a covering letter which delays disability registration and  
24  
25 can delay services for the patient.' (SS5)  
26  
27

28  
29  
30  
31 An additional practice that unnecessarily delays sending certifications to SS is  
32  
33 waiting to send CVIs in batches. All SS staff (n=12) stated they received CVIs  
34  
35 in batches. Patients also reported variations in the length of time it took social  
36  
37 services to contact and/or visit them. This was confirmed by interviews with  
38  
39 social services staff.  
40

41  
42 'Apparently they were meant to put me in touch. I've been on a  
43  
44 waiting list for nearly 4 months and nobody's got in touch with  
45  
46 me...I'm still waiting; I'm still on a list.' (Pat42)  
47

48  
49 'Sensory team used to be part of bigger team that had two admin  
50  
51 workers, did have bigger team, now have part-time rehab, no  
52  
53 admin, manager not in the building, massive change.' (SS6)  
54  
55  
56  
57  
58  
59  
60

1  
2 There were repercussions of these delays, close to half (20/46 patients,  
3  
4 43%) stated they would have liked to have been offered certification  
5  
6 earlier, to access support. The purpose of the CVI, to prompt access to  
7  
8 holistic low vision and sensory support, is much valued by patients and  
9  
10 many would benefit from being offered or receiving this support as early  
11  
12 as possible.  
13

### 14 15 16 17 18 **The role of clinic support staff and the ECLO**

19  
20 Each hospital eye clinic had an ECLO in post but the role of the ECLO in the  
21  
22 certification and registration process differed in each hospital. The function of  
23  
24 the ECLO was dictated largely by ophthalmologists' perception of the ECLO's  
25  
26 role.  
27

28  
29  
30  
31 The presence of an ECLO was viewed as beneficial by all patients and the  
32  
33 majority of staff. Most ophthalmologists (N=9) agreed it was more cost-effective  
34  
35 and a better use of their time if ECLOs helped to complete the CVI and  
36  
37 participate in the certification process. Although the ECLOs said they were often  
38  
39 used inconsistently by ophthalmologists.  
40  
41

42  
43  
44  
45 'I must say that ECLO was brilliant. She talked us through what  
46  
47 was going to happen, what we had to do, literally I didn't do much  
48  
49 after that... I literally came out of the door and met ECLO, I'm  
50  
51 glad she was there because you come out and you think right?  
52  
53 What now? What does it mean? What do I do? How do I cope?  
54  
55 And she was there. That made a huge difference to me....  
56  
57 ECLO is the most wonderful person.' (Pat23)  
58  
59  
60

1  
2  
3  
4 'ECLO offered help...gave me time to think about it...and I  
5  
6 needed time...she was very sympathetic and did her job  
7  
8 beautifully.' (Pat2)  
9

10  
11  
12  
13 'Biggest positive for us has been the ECLO - irons out difficulties  
14  
15 in liaising with different agencies and informing the patients about  
16  
17 the benefits and the sources of help they can get. Made a big  
18  
19 difference in my practice.' (Oph10)  
20  
21  
22  
23

#### 24 **The patient benefit of certification and registration**

25  
26 The certification and registration processes were an emotionally overwhelming  
27  
28 time for almost all patients and they described the help they receive at this time  
29  
30 as substantially improving their lives. The support offered as a result of being  
31  
32 certified and registered changed lives and made patients more confident.  
33  
34  
35

36  
37 'I used to sit crying a great deal before these things started  
38  
39 feeding through to me, from social services. I have a certain  
40  
41 amount of confidence back...I lost all of that at one time.' (Pat37)  
42  
43

44  
45 'It's all about confidence, my confidence went to zero. The more  
46  
47 things you can do for yourself, more confident with, makes your  
48  
49 life better.' (Pat23)  
50

51  
52 The practical assistance that resulted from certified and registered was  
53  
54 also valued by patients;  
55  
56  
57  
58  
59  
60

1  
2 'I faced my fear thinking I'd never walk in the dark anymore and  
3  
4 thanks to social services, they've trained me to walk in the dark.'  
5  
6 (Pat14)  
7  
8  
9

10  
11 '[social services] issued me with bus pass, made me more  
12  
13 mobile, fold up white stick, recognition stick, helps an immense  
14  
15 amount.' (Pat31)  
16  
17  
18

### 19 **Improving the certification and registration process**

20  
21  
22 Suggestions to improve certification and registration included initiatives to  
23  
24 improve health professionals' level of awareness about the benefits of being  
25  
26 certified and registered. In one area studied, the SSD worked collaboratively  
27  
28 with consultants to improve patients' experiences of certification and  
29  
30 registration.  
31  
32  
33

34  
35  
36 Greater use of the ECLO was also a common theme suggested to improve the  
37  
38 service. In one area social services said the number of incomplete forms  
39  
40 decreased since an ECLO was employed, stating that previously 10-15% CVIs  
41  
42 received would be sent back as they were incomplete. Ophthalmologists also  
43  
44 commented on the difference ECLOs make to providing accurate and detailed  
45  
46 information to patients.  
47  
48  
49

50  
51 'I'm happy to provide what support I can but I'd readily agree that  
52  
53 I don't have the time and I don't think I'm as good as the ECLO  
54  
55 because I think most of us assume what patients want and need.  
56  
57 We spend our lives making decisions for them with our expertise  
58  
59  
60

1  
2 and experience...I don't have the time on the day...and the  
3  
4 ECLO does and so wonderfully.' (Oph1)  
5  
6  
7

8  
9 In many areas the third sector played a key role in providing support to patients  
10 who were extremely grateful for this assistance. Where support from SSDs took  
11 longer to arrive, the role of the voluntary sector was invaluable.  
12  
13

14  
15  
16  
17  
18 'We contacted Action for Blind and they helped filled out forms  
19 with... I've learned more from RNIB/Action than anyone else.'  
20  
21 (Pat39)  
22  
23

24 '...Age Concern was brilliant...people would be in a complete  
25 panic quite honestly if you were on your own and you had to  
26 come home on your own and then you suddenly got to cope with  
27 all this stuff.' (Pat5)  
28  
29  
30  
31  
32  
33  
34

## 35 Discussion

36  
37  
38 The current study examined the process of sight loss certification and  
39 registration in three areas in England in order to identify potential barriers and  
40 delays in timely certification and registration and possible options for improving  
41 the service.  
42  
43  
44  
45  
46  
47  
48

49  
50 Despite the ageing population and predicted increases in those with sight loss,  
51 <sup>(17)</sup> the numbers of people certified each year with sight loss have declined in  
52 recent years, with the exception of the 12-months from April 2011 to March  
53 2012, which showed a marked increase on previous years. A significant  
54 geographical variation also exists across England in certification rates of  
55  
56  
57  
58  
59  
60

1  
2 blindness and sight impairment. <sup>(7)</sup> These variations in rates of certification and  
3  
4 registration have been attributed to differences in the level at which certification  
5  
6 is being offered, care pathways, perceived value of certification and registration  
7  
8 and payment for CVI forms. However, this information is largely anecdotal and  
9  
10 this is the only study to directly explore the sight loss certification and  
11  
12 registration pathways.  
13

14  
15  
16  
17 In our study, ophthalmologists revealed they are often uncertain as to when to  
18  
19 offer certification. For some patients it is clearly evident when their eye sight  
20  
21 has reached the point to be certified but for others deciding when to certify is  
22  
23 more ambiguous. Research finds higher under-registration in patients with  
24  
25 treatable disease compared to those with untreatable disease. <sup>(18)</sup> The  
26  
27 uncertainty of when to certify was also an issue for other eye conditions. <sup>(19)</sup> For  
28  
29 example, certifying patients with atrophic AMD also presents significant timing  
30  
31 difficulties. <sup>(20)</sup> These patients often experience severe sight loss after discharge  
32  
33 but need to be referred back into the hospital eye service for certification when  
34  
35 their vision declines. Introducing these patients to the ECLO/social services  
36  
37 team before they are discharged will improve their access to relevant support  
38  
39 services.  
40  
41  
42  
43  
44  
45

46  
47 Some ophthalmologists are unclear of the purpose of certification which may  
48  
49 affect when they offer it to patients. Consultants may delay certifying patients as  
50  
51 they regard certification as the *end of a clinical process* and wait to certify  
52  
53 patients until they think they cannot offer any further medical treatments.  
54

55  
56 Related to the issue of *when* to offer certification is the reason for offering it: the  
57  
58 purpose of certification is to provide access to support for patients. Certification  
59  
60



1  
2 and registration are not simply medical processes but a significant step in  
3  
4 patients' adjusting and accepting of their sight-loss. Interviews with patients  
5  
6 revealed the issuing of certification is often viewed as the beginning of a new  
7  
8 phase and a gateway to much needed support. In contrast, many  
9  
10 ophthalmologists regard certification as the end of the process but this attitude  
11  
12 can lead to patients needing support left without it.  
13

14  
15  
16  
17 There was variation in the certification process in each of the three areas and  
18  
19 the process used by each consultant differed within hospitals. The Department  
20  
21 of Health recommends the CVI be sent to the local social services department  
22  
23 "within five working days".<sup>(21)</sup> Across the three areas, interviews with hospital  
24  
25 and social services staff and patients revealed that only very rarely were CVIs  
26  
27 sent to SSDs within five days. It was much more common for CVIs to take  
28  
29 weeks or months to be sent to SSDs. Previous research also found that delays  
30  
31 often occur when CVIs are sent to SSDs.<sup>(22)</sup> Each administrator (n=8) confirmed  
32  
33 consultants can 'take a while' to return the CVI to their office. Another significant  
34  
35 delay is sending incomplete CVIs to SSDs; an unnecessary delay for patients  
36  
37 waiting for support.  
38  
39  
40  
41  
42  
43

44 These practices lengthen the certification and registration processes, making it  
45  
46 more complicated and unnecessarily fraught for patients. In each of the three  
47  
48 areas studied, there were examples of good and bad practice and stories of  
49  
50 both grateful and frustrated patients, thus a good certification process is  
51  
52 achievable in every department.  
53  
54  
55  
56  
57  
58  
59  
60

1  
2 A more holistic approach to eye health is needed; health professionals,  
3  
4 including registrars, ophthalmologists, optometrists and medical secretaries  
5  
6 should improve their awareness of when certification should be offered and how  
7  
8 certification benefits patients. Any additional time needed for CVI discussion in  
9  
10 clinic may not be readily available due to pressures on quantity (e.g. meeting  
11  
12 Referral to Treatment guidance and other performance targets), therefore  
13  
14 departments should explore if others, such as optometrists or ECLOs, are better  
15  
16 placed to complete parts of the CVI. It should also be considered who is best  
17  
18 placed to send completed CVIs quickly - ECLOs or secretaries or a designated  
19  
20 administrator/team.  
21  
22  
23  
24  
25

26 Understanding how certification and registration operates at a local level will  
27  
28 help commissioners and clinicians better understand the reasons for the  
29  
30 variations in certification and registration rates and take steps to address the  
31  
32 inconsistencies. Quantifying the barriers to timely certification and registration,  
33  
34 and benchmarking against best practice will also help ensure the correct level of  
35  
36 service provision, enabling health and social care commissioners to deliver  
37  
38 consistent, high quality services based on an accurate assessment of need.  
39  
40  
41  
42  
43

#### 44 **Limitations of research**

45  
46 The interviews include only those who were certified, further research could  
47  
48 examine patients who are eligible for certification but who either decline to be  
49  
50 certified or are not offered it by clinicians. In addition, as the research used  
51  
52 qualitative methods, we were able to interview a limited number of health and  
53  
54 social care professionals. Further research is needed to examine a wider range  
55  
56 of departments over a longer period of time. Research is also needed to  
57  
58  
59  
60

1  
2 understand the impact of the Disability Living Allowance assessment policies  
3  
4 and whether there is any pressure on ophthalmologists not to certify patients.  
5  
6  
7  
8  
9

10 TB wrote the initial draft. All authors revised the initial draft, FG revised the  
11  
12 subsequent drafts. TB and SL wrote the final draft. TB is the guarantor. All  
13  
14 authors have full control of the content of the article.  
15  
16  
17  
18  
19  
20  
21  
22  
23  
24  
25  
26  
27  
28  
29  
30  
31  
32  
33  
34  
35  
36  
37  
38  
39  
40  
41  
42  
43  
44  
45  
46  
47  
48  
49  
50  
51  
52  
53  
54  
55  
56  
57  
58  
59  
60

**Acknowledgements:**

Many thanks to the health professionals, representatives from social services and patients who participated in the interviews and took great courage in providing honest feedback on their experiences of the C&R process. Many thanks to the advisory group who provided guidance and advice.

**Funding statement**

The Royal National Institute of Blind People funded this research. The funders contributed to the design of the research.

**Contributorship Statement:** TB wrote the initial draft. All authors revised the initial draft, FG revised the subsequent drafts. TB and SL wrote the final draft. TB is the guarantor. All authors have full control of the content of the article.

**Competing interests:**

None.

**Data Sharing Statement:** We will not make any additional unpublished data available.

## References

- 1 RNIB. *Vision criteria for registration*. RNIB, 2014.  
[http://www.rnib.org.uk/livingwithsightloss/registeringsightloss/Pages/vision\\_criteria.aspx](http://www.rnib.org.uk/livingwithsightloss/registeringsightloss/Pages/vision_criteria.aspx) (Accessed 18 January 2014).
- 2 Department of Health. *Public Health Outcomes Framework 2013 to 2016 and technical updates*. DH, 2013.  
<https://www.gov.uk/government/publications/healthy-lives-healthy-people-improving-outcomes-and-supporting-transparency> (Accessed 18 January 2014).
- 3 RNIB. *Sight loss UK 2012 - The latest evidence*. RNIB, 2012.  
[http://www.rnib.org.uk/aboutus/Research/reports/otherresearch/Pages/sight\\_loss\\_uk.aspx](http://www.rnib.org.uk/aboutus/Research/reports/otherresearch/Pages/sight_loss_uk.aspx) (Accessed 17 January 2014)
- 4 Leamon S. *Number of adults and children certified with sight impairment and severe sight impairment in England and Wales: April 2008 – March 2009*. RNIB, 2012.  
[http://www.rnib.org.uk/aboutus/Research/reports/otherresearch/Pages/sight\\_loss\\_statistics\\_report.aspx](http://www.rnib.org.uk/aboutus/Research/reports/otherresearch/Pages/sight_loss_statistics_report.aspx) (Accessed 17 January 2014)
- 5 Leamon S. *Number of adults and children certified with sight impairment and severe sight impairment in England and Wales: April 2011-March 2012*. RNIB, 2013.  
[http://www.rnib.org.uk/aboutus/Research/reports/otherresearch/Pages/sight\\_loss\\_statistics\\_report.aspx](http://www.rnib.org.uk/aboutus/Research/reports/otherresearch/Pages/sight_loss_statistics_report.aspx) (Accessed 17 January 2014)
6. The NHS Information Centre, Adult Social Care Team. *Registered Blind and Partially Sighted People Year ending 31 March 2011, England*. NHS Information Centre, 2011.  
<http://www.hscic.gov.uk/pubs/blindpartiallysighted11> (Accessed 17 January 2014)
7. [Malik ANJ, Bunce C, Wormald R, Suleman M, Stratton I, Muir Gray JA.](#) Geographical variation in certification rates of blindness and sight impairment in England, 2008–2009. *BMJ Open*. 2012; 2:e001496. doi:10.1136/bmjopen-2012-001496.
- 8 Britten N. Qualitative interviews in medical research. *BMJ* 1995; 311:251-3.
- 9 Boyce T. *The Certification and Registration Processes: Stages, barriers and delays*. RNIB, 2012.  
[http://www.rnib.org.uk/aboutus/Research/reports/earlyreach/Pages/certification\\_registration\\_processes.aspx](http://www.rnib.org.uk/aboutus/Research/reports/earlyreach/Pages/certification_registration_processes.aspx) (Accessed 17 January 2014).
- 10 McGuire LC. Remembering what the doctor said: Organization and adults - memory for medical information. *Exp. Aging Res* 1996;22:403–428.
- 11 McLean RJ, Windridge KC, Gottlob. Living with nystagmus: A qualitative study. *Br J Ophthalmol* 2012;96:981-986 doi:10.1136/bjophthalmol-2011-301183
- 12 Office for National Statistics. *Annual Mid-year Population Estimates, 2011 and 2012*. ONS, 2013.  
<http://www.ons.gov.uk/ons/rel/pop-estimate/population-estimates-for-uk--england-and-wales--scotland-and-northern-ireland/mid-2011-and-mid-2012/stb--mid-2011---mid-2012-uk-population-estimates.html#tab-Mid-2011-and-mid-2012-UK-population-estimates-> (Accessed 17 January 2014).

- 1  
2  
3  
4  
5  
6  
7  
8  
9  
10  
11  
12  
13  
14  
15  
16  
17  
18  
19  
20  
21  
22  
23  
24  
25  
26  
27  
28  
29  
30  
31  
32  
33  
34  
35  
36  
37  
38  
39
- 13 Office for National Statistics. *Population Estimates by Ethnic Group: Methodology Paper*. ONS, 2011.  
<http://www.ons.gov.uk/ons/taxonomy/index.html?nscl=Population+Estimates+by+Ethnic+Group> (Accessed 17 January 2014)
- 14 Miles MB, Huberman AM. *Qualitative data analysis: An expanded sourcebook (Second Edition)*. London: Sage Publications; 1994.
- 15 Morse JM, Field PA. *Qualitative research methods for health professionals (Second Edition)*. London: Sage Publications; 1995.
- 16 Maxwell JA. *Qualitative research design. An interactive approach (Second edition)*. London: Sage Publications; 2005.
- 17 Leamon S. *Number of adults and children certified with sight impairment in England and Wales: April 2011-March 2012*. RNIB, 2013.  
[http://www.rnib.org.uk/aboutus/Research/reports/otherresearch/Pages/sight\\_loss\\_statistics\\_report.aspx](http://www.rnib.org.uk/aboutus/Research/reports/otherresearch/Pages/sight_loss_statistics_report.aspx) (Accessed 17 January 2014).
- 18 Kotecha A, Fernandes S, Bunce C, et al. Avoidable sight loss from glaucoma: is it unavoidable? *Br J Ophthalmol* 2012;96:816e820.  
 doi:10.1136/bjophthalmol-2012-301499
- 19 Barry RJ, Murray PI. Unregistered visual impairment: is registration a failing system? *Br J Ophthalmol* 2005;89:995e8
- 20 Rostron E, McKibbin M. Visual impairment certification secondary to ARMD in Leeds, 2005–2010: is the incidence falling? *Eye* 2012;26:933-936.
- 21 Department of Health. *Certificate of Vision Impairment Explanatory Notes for Consultant Ophthalmologists and Hospital Eye Clinic Staff*.  
[https://www.gov.uk/government/uploads/system/uploads/attachment\\_data/file/127399/CVI-Explanatory-notes-in-DH-template.pdf](https://www.gov.uk/government/uploads/system/uploads/attachment_data/file/127399/CVI-Explanatory-notes-in-DH-template.pdf) (Accessed 17 January 2014).
- 22 Bunce C, Smyth L, Xing W, et al. (ND) *Research into drop in registrations of blind and partially sighted people*. (Supplied by first author, available from TB).

40  
41  
42

#### Table 1 Definitions of SI and SSI

43  
44  
45

To be registered as severely sight impaired (blind), sight has to fall into one of the following categories, while wearing any glasses or contact lenses that one may need:

- 46  
47  
48  
49  
50  
51  
52
- visual acuity of less than 3 / 60 with a full visual field
  - visual acuity between 3 / 60 and 6 / 60 with a severe reduction of field of vision, such as tunnel vision
  - visual acuity of 6 / 60 or above but with a very reduced field of vision, especially if a lot of sight is missing in the lower part of the field.

53  
54  
55  
56

**To be registered as sight impaired (partially sighted) sight has to fall into one of the following categories, while wearing any glasses or contact lenses that one may need:**

- 57  
58  
59  
60
- visual acuity of 3 / 60 to 6 / 60 with a full field of vision

- visual acuity of up to 6 / 24 with a moderate reduction of field of vision or with a central part of vision that is cloudy or blurry
- visual acuity of up to 6 / 18 if a large part of your field of vision, for example a whole half of your vision, is missing or a lot of your peripheral vision is missing.<sup>(1)</sup>

Further information on CVI can be found on the Royal College of Ophthalmology webpage: <[http://www.rcophth.ac.uk/page.asp?section=851&search=>](http://www.rcophth.ac.uk/page.asp?section=851&search=).

Table 2. Number of interviews by type and area

| Area A            | Area B            | Area C            |
|-------------------|-------------------|-------------------|
| 10 Hospital Staff | 13 Hospital staff | 8 Hospital staff  |
| 1 Social Services | 9 Social Services | 2 Social services |
| 15 Patients       | 15 Patients       | 16 Patients       |
| Total: 26         | Total: 37         | Total: 26         |

**Title:**

Certification for vision impairment – perceptions, process and practicalities

**Keywords:**

Blindness; Visually Impaired Persons; Certification of Vision Impairment;  
Professional-Patient Relations

**Authors:**

Dr T Boyce (Corresponding)  
Department of Medicine  
Imperial College  
London

30 Victoria Park Rd East  
Cardiff  
CF5 1EH  
<tboyce@imperial.ac.uk>

[Mr Shaun Leamon](#)  
[Royal National Institute of Blind People \(RNIB\)](#)  
[105 Judd Street](#)  
[London](#)  
[WC1H 9NE](#)  
[020 7388 1266](#)

Mr J Slade  
~~[Royal National Institute of Blind People \(RNIB\)](#)~~  
105 Judd Street  
London  
WC1H 9NE  
020 7388 1266

Dr P Simkiss  
RNIB  
105 Judd Street  
London  
WC1H 9NE  
020 7388 1266

Ms S Rughani  
RNIB  
105 Judd Street  
London  
WC1H 9NE  
020 7388 1266

Mr Faruque Ghanchi



Bradford Teaching Hospitals NHS Foundation Trust  
Duckworth Lane  
Bradford  
BD9 6RJ  
01274 382386

## Abstract (255)

### Objectives

To explore the patient experience of sight loss evaluate the processes for certification and registration, of vision impairment (CVI) in clinical practice, examine and the role of ophthalmologists and other health and social care professionals in the certification and registration processes and processes and examine s and the main barriers and causes for delays and to the timely certification enablers of patients.

### Design

Qualitative study.

### Setting

Telephone interviews were held with health and social care professionals and patients in three areas from three sites in England examining their experiences of the certification and registration processes.

### Participants

43 health and social care professionals who are part of the certification or registration process, and 46 patients certified as blind or partially sighted within the previous 12 months.

### Results

The number of certificates of vision impairment (CVI) is falling inconsistently across England. Certification and registration is life changing for patients and the help they receive can substantially improve their lives. Despite this,

1  
2  
3  
4  
5  
6  
7  
8  
9  
10  
11  
12  
13  
14  
15  
16  
17  
18  
19  
20  
21  
22  
23  
24  
25  
26  
27  
28  
29  
30  
31  
32  
33  
34  
35  
36  
37  
38  
39  
40  
41  
42  
43  
44  
45  
46  
47  
48  
49  
50  
51  
52  
53  
54  
55  
56  
57  
58  
59  
60

~~ophthalmologists often found it difficult to ascertain when it is appropriate to certify patients, particularly for people with long term conditions. The process of being certified is separate from being registered for vision impairment. Deciding at what point a patient should be certified can be uncertain and eOphthalmologists varied in their comprehension of the certification process and many regarded certification as the 'final stage' in treatment. Administrative procedures meant the process of length of time to complete the certification and registration process could varied from a few weeks to many months. The avoidable delays in completing and forwarding of the CVIs to social services certification can be helped by Eye Clinic Liaison Officers (ECLO).~~

## Conclusion

~~A better understanding of the certification and registration processes can help drive up standards of support and service provision for blind and partially sighted people. Better education and support is required for ophthalmologists in recognising the importance of timely referral for rehabilitative support through certification and registration. ECLOs can improve the process of certification and registration. Finally, better education is needed for patients on the benefits of certification and registration.~~

~~Visual function is the key aspect to consider when offering a patient CVI. Being certified with vision impairment is a significant process for patients that can substantially change their lives. Eye Clinic Liaison Officers can improve the process of being certified and registered.~~

## Article summary

### Strengths and limitations of this study

- This is the first study to focus on all those involved in the certification and registration processes – various health and social care professionals as well as patients.
- The research design includes areas with differing rates of certification demonstrating and show the opportunities to improve practice to ensure the certification process is more consistent.
- The number of participants was small, so findings should be considered indicative, however, saturation/repetition levels were reached in all three interview groups, suggesting confidence in the findings.
- All patients were certified, further research including this group is needed to explore why these patients are declining certification.

#### **Funding statement**

The Royal National Institute of Blind People funded this research. The funders contributed to the design of the research.

## Introduction [\(count 3863\)](#)

The Certificate of Vision Impairment (CVI) was introduced in England in September 2005 and in Wales in April 2007. Its purpose is to provide a reliable route for someone with sight loss to be brought to the attention of social care. Certification and registration are two separate processes: an ophthalmologist completes the CVI based on existing visual function criteria and support needs. Patients can be certified as sight impaired (SI – formerly ‘partial sighted’) or severe sight impairment (SSI – formerly ‘blind’). [\(see Table 1 for an overview of criteria\)](#). Local Social Service Department (SSDs) then initiate the registration process upon receipt of the completed CVI. Registration is ~~a voluntary choice;~~ as such, SSDs ask patients if they would like to be registered.

[When patients are certified as either blind/ SSI or partially sighted/ SI the are eligible for a range of support including: financial concessions \(e.g. tax breaks, free NHS sight tests\), welfare benefits and the loan of aids and equipment.](#)

[Data collected by CVI also provides valuable epidemiological information on the prevalence of sight loss.](#)

[There is concern that the number of CVIs should be as accurate as possible as the Public Health Outcomes Framework in England, introduced in 2013, includes an indicator for preventable sight loss for the first time. The indicator aims to better target financial resources to improve early detection of the three major causes of sight loss \(glaucoma, age related macular degeneration \(AMD\) and diabetic retinopathy\).<sup>\(2\)</sup> As the CVI includes causes of vision impairment, it will provide a metric for levels of avoidable sight loss for the indicator. It is](#)

1  
2 therefore important that the number and information in CVIs and subsequent  
3  
4 registrations reflect accurate levels of need.  
5  
6

7  
8  
9 The prevalence of sight loss increases with age. The ageing population in the  
10 UK would therefore be expected to result in an increase in sight loss<sup>(4)</sup>.

11  
12 However, evidence shows ~~t~~The numbers of certifications and registrations have  
13 varied~~show, however, considerable~~ variation over time and in many cases  
14 numbers have declined. This is in addition to the increasing prevalence of sight  
15 loss accompanied by the ageing population in the UK.<sup>(3)</sup> In the 12-months from  
16 April 2008 to March 2009, the number of certifications was 23,773, a marked  
17 increase on the previous 12-months.<sup>(4)</sup> Certifications then decreased in  
18 2009/2010 and 2010/2011, before rising to 23,616 in 2011/2012.<sup>(5)</sup> Similarly,  
19 the triennial survey of people registered with Councils with Adult Social Services  
20 Responsibilities in England as being blind or partially sighted showed an overall  
21 decreased in new registrations in 2010/2011 compared with 2008/2009.<sup>(6)</sup>  
22 Perhaps even more noteworthy is the large geographical variation found to exist  
23 in rates of blindness and sight impairment, with an 11-fold difference found to  
24 exist between the highest and lowest rate, according to 2008/2009 data.<sup>(7)</sup>  
25  
26  
27  
28  
29  
30  
31  
32  
33  
34  
35  
36  
37  
38  
39  
40  
41  
42  
43

44 There has been an inconsistent decline in both the number of certifications and  
45 number of registrations in many areas of England, though the ageing population  
46 would suggest an increase in certifications.<sup>(4)</sup> ~~There~~ There is also concern that  
47 the number of CVIs should be is as accurate as possible as the Public Health  
48 Outcomes Framework in England, introduced in 2013, includes an indicator for  
49 preventable sight loss for the first time. ~~The~~ indicator aims to better target  
50 financial resources to improve early detection of the three major causes of sight  
51  
52  
53  
54  
55  
56  
57  
58  
59  
60

1  
2  
3  
4  
5  
6  
7  
8  
9  
10  
11  
12  
13  
14  
15  
16  
17  
18  
19  
20  
21  
22  
23  
24  
25  
26  
27  
28  
29  
30  
31  
32  
33  
34  
35  
36  
37  
38  
39  
40  
41  
42  
43  
44  
45  
46  
47  
48  
49  
50  
51  
52  
53  
54  
55  
56  
57  
58  
59  
60

loss (glaucoma, age related macular degeneration (AMD) and diabetic retinopathy).<sup>(2)</sup> As the CVI includes causes of vision impairment, it will provide a metric for levels of avoidable sight loss for the indicator. It is therefore important that the number and information in CVIs and subsequent registrations reflect accurate levels of need.

This paper examines the certification and registration processes in hospitals and social services departments and identifies the main barriers, delays and enablers ~~with particular emphasis on the role of ophthalmologists~~. It also explores the significance of certification and registration for patients.

## Materials and Methods

### Sample

A qualitative study was designed based on semi-structured telephone interviews of clinical and social care providers and service users.<sup>(8,4)</sup> The study was undertaken at in three separate areas of England identified as having fluctuating rates of sight loss inconsistent CVI certification registration rates between 2006 and 2011<sup>(99)</sup>. NHS research ethics approval was secured for each hospital site. 43 health and social care professionals and 46 patients were interviewed by an experienced interviewer (See Table 24). The term 'patient' is used throughout the report instead of 'client' or 'service user'. This is for continuity and clarity.

The interviews with hospital and social services staff interviews were included interviews with: ophthalmologists, optometrists and, nurses working in ophthalmology departments, social services rehabilitation officers, social

1  
2 services administrators, Eye Clinic Liaison Officers (ECLOs) and hospital  
3  
4 administration staff (See Table 2). These interviewed included; ophthalmologists  
5  
6 (12), ECLOs (4), Nurses (3), Optometrists (4) and Administrators (8). All  
7  
8 ophthalmologists interviewed were consultants except one trainee registrar. Of  
9  
10 the eleven consultants interviewed, two were qualified for less than two years;  
11  
12 the remaining nine consultants were qualified for over ten years. Hospital  
13  
14 interviewees were identified by their head of department. Social care  
15  
16 interviewees were identified by ECLOs and a representative from local the  
17  
18 London Visual Impairment Forums.  
19  
20  
21  
22  
23

24 Patients with vision impairment (and two primary carers) were interviewed.  
25  
26 Patients were identified by ECLOs or social services. As patients' recollections  
27  
28 of medical consultations can be poor within relatively short periods after a  
29  
30 consultation,<sup>(104)</sup> only patients certified within the last year were interviewed.  
31  
32 Interviewees included patients certified and registered (n = 32), and those  
33  
34 certified only certified (n = 5) and those certified but unsure if they were  
35  
36 registered (n = 9). A sampling frame was created to direct patient recruitment.  
37  
38 The sample frame aimed to ensure a diversity of patients in terms of age,  
39  
40 ethnicity, gender and income variation.<sup>(115)</sup>  
41  
42  
43  
44  
45

46 Fifteen per cent One fifth (n = 711) of patients identified classified themselves as  
47  
48 Asian, seven per cent (n = 3) Black and the remainder White (n = 36). Forty-  
49  
50 one per cent (n = 19) 41% stated they had an income below £15,000/annum.  
51  
52 Sixty-three per cent (n = 29) of patients 63% were over 60 years of age and fifty-  
53  
54 seven per cent (n = 26) out of 46 interviews were with women. Compared to  
55  
56 national CVI figures, Black and Minority Ethnic patients were over represented  
57  
58  
59  
60

and ~~t~~the gender characteristics of the sample were comparable with national demographics.<sup>(12, 13)</sup>

## Interviews and Data Analysis

~~Semi-structured T~~telephone interviews were ~~arranged-conducted~~ with individual participant's ~~agreement~~ at a time that suited the interviewees. Interviews lasted on average for 15 ~~minutes,~~minutes; although some were substantially longer (~~p~~Patients ~~interviews~~ ranged ~~from~~ 8-40 minutes, ~~interviews with~~ health/social care professionals ~~\_ranged from~~ 6-50 minutes). ~~The interviews were based on~~ Topics for discussion were ~~semi-structured questions that were predefined~~ predefined by the consensus of the research ~~steering group~~team. Interviews ~~questions with professionals sought to explore: 1) knowledge and understanding of certification and registration; 2) local pathways and the factors affecting certification and registration; 3) the role of different health and social care professionals; and 4) the future of certification and registration and suggestions for improvement.~~ Interviews with patients explored: 1) experiences of being certified and registered; 2) the impact of certification and registration on the lives of patients and their families; 3) and suggestions for improvement (See Box 1-3).

CVI process / when you recommend certification  
 Purpose of CVI  
 What you tell patients about CVI  
 Barriers to approaching patients  
 Length to complete CVI  
 Knowledge of benefits of being certified  
 Reasons for decline  
 Improvements

Box 1: Themes in ophthalmology/optometrist/nurse questions

CVI process  
 Length from receiving CVI to sending to social services  
 Purpose of CVI



|              |
|--------------|
| Improvements |
|--------------|

|                                                 |
|-------------------------------------------------|
| Box 2: Themes in administrators/ ECLO questions |
|-------------------------------------------------|

|                                                                   |
|-------------------------------------------------------------------|
| Experiences of being certified and registered, length to complete |
|-------------------------------------------------------------------|

|                                        |
|----------------------------------------|
| Access to support before certification |
|----------------------------------------|

|                                    |
|------------------------------------|
| Box 3: Themes in patient questions |
|------------------------------------|

Interview questions acted as a guide and additional information was also gleaned.

All interviews were recorded, transcribed and analysed using thematic analysis.

A list of deductive codes was initially created; inductive codes emerged during the second level of the thematic analysis. [\(14,15,16,7,8\)](#)

~~The findings are illustrated with extracts from the interviews. Extracts are referenced with the type of interviewee and interview number. The interviewees are described using a number and labels – patient (Pat); ophthalmologist (Ophth); secretaryies and /administrators (Adm); nurse (Nur); optometrist (Optom); Eye Clinic Liaison Officer (ECLO) and social services staff – (managers, rehabilitation officers, administrators) (SS).~~

It was observed that the terms ‘certification’ and ‘registration’ were used incorrectly and inconsistently by most interviewees; hence these terms were amended in the text to provide clarity. ~~In addition, the term ‘patient’ is used throughout the report instead of ‘client’ or ‘service user’. This is for continuity and clarity.~~

## Results

The research findings are grouped into overarching themes. Despite the differences in size, location and demography of the three areas, there was considerable consistency in the findings. There were, however, local variations in subtle differences the certification and registration processes, in process for certification in the three areas

### Knowledge and awareness of the purpose and benefits of certification and registration

Many health professionals were poorly informed about the purpose and benefits of certification and registration. Almost every health professional was unaware there was a difference between certification and registration. The terms 'certified' and 'registered' were interchanged throughout all interviews. Most health professionals assumed registration happened automatically once a patient was certified at the hospital.

'That's really weird. I thought if we certified the patients we automatically registered them with social services. I'm really surprised to hear that.' (Nur2)

Consequently, only a small number of health professionals were aware of what SSDs offered to certified and registered patients;

'(SS provide) enormous echelons of help, home visits, advice about lighting, advice about managing in home when you've got visual impairment, enormous levels of support that you don't

1  
2 need to be registered to get that support. Great to have ECLO to  
3  
4 access this cause that's their expertise.' (Ophth6)  
5  
6  
7

### 8 Uncertainty when to certify the patient

9  
10  
11 The point at which certification was offered to patients varied between ~~and the~~  
12 clinicians ~~ss differed in the timing of offer of certification to the patients.~~ The  
13 difference was ~~not so much~~ less a geographic trend and more ~~but~~ related to the  
14 individual clinician's approach. ~~It was not possible to conclude in this research if~~  
15 ~~differences in certification processes are due to systematic issues or individual~~  
16 ~~practices.~~  
17  
18  
19  
20  
21  
22  
23  
24  
25  
26

27 Ophthalmologists identified difficulties in subjective interpretation of visual field  
28 defect and fluctuating visual function as potential reasons why the offer of  
29 certification may be inconsistent or delayed. Ophthalmologists also highlighted  
30 the impact of recent advancements in treatment on the decision of when to  
31 certify a patient.  
32  
33  
34  
35  
36  
37  
38  
39

40 'The whole issue itself is subjective... It depends on the clinician,  
41 assessing the visual field and interpreting that.' (Oph10)  
42  
43  
44  
45

46  
47 'People with AMD with injections go up and down... Once they  
48 have reached certifiable level, a lot of time we couldn't do  
49 anything and historically we would have offered certification. Now  
50 they will have a few more injections, they get a little better.'  
51  
52  
53  
54  
55  
56 (Oph11)  
57  
58  
59  
60

1  
2  
3  
4  
5  
6  
7  
8  
9  
10  
11  
12  
13  
14  
15  
16  
17  
18  
19  
20  
21  
22  
23  
24  
25  
26  
27  
28  
29  
30  
31  
32  
33  
34  
35  
36  
37  
38  
39  
40  
41  
42  
43  
44  
45  
46  
47  
48  
49  
50  
51  
52  
53  
54  
55  
56  
57  
58  
59  
60

Most ophthalmologists stated that they based their decisions on *when* to offer certification primarily on visual acuity; they did not consider the patient's functionality or the level of support they might need. Half of the ophthalmologists (n=6) reported relying solely on quantitative visual function (i.e. acuity or visual field).

In contrast, almost all optometrists and nurses interviewed considered a patient's functionality when deciding whether or not to recommend certification:

'I don't look at it from the medical point of view rather from the social point of view. I do try to ask everybody who would fit the criteria and I probably try to engage more the people maybe I think would benefit from being registered, someone by themselves, could do with help from social services.' (Nur2)

### **Certification as the end of the process, not a route to services**

Approximately half of the ophthalmologists (n=5) regarded certification as the 'final stage' in the management of a patient's condition, only offered to the patient at the *end* of their treatment.

'I think in practice (certification) does tend to coincide with an acknowledgement that there's little more that we can offer them medically...Certification can often form part of a process towards the end of a period of medical care and so it often coincides with their discharge from hospital or their discharge from a period of follow-up.' (Oph5).

1  
2 In contrast, patients very much regarded certification as a significant point in  
3 their treatment, stating it was the beginning of a stage of acceptance of their  
4 sight loss. The offer of certification was emotionally overwhelming for almost  
5 every patient interviewed (n=41); the help they received at this time vastly  
6 improved the quality of their lives.

7  
8  
9  
10  
11  
12  
13  
14  
15 Interviewer: 'Has registration helped you?'

16  
17 'Absolutely, 100%.' (Pat26)

### 18 19 20 21 Administrative barriers to certification and registration

22  
23  
24  
25 The length of time to complete the certification and registration process varied  
26 within each area and across the three sites. Patients reported the length of time  
27 for them to go through certification and registration ranged from a few weeks to  
28 close to one year.

29  
30  
31  
32  
33  
34  
35  
36  
37 'It took quite a while, and for (hospital) to send out information  
38 like CVI and all that.' (Pat25)

39  
40  
41  
42  
43  
44 'SS was a long time getting the information from the hospital...My  
45 son and daughter- in-law called them because no one contacted  
46 us.' (Pat26)

47  
48  
49  
50  
51  
52 A significant difference between hospitals was the length of time for CVIs to be  
53 sent to SSDs. Within each of the three geographic areas studied sSocial  
54 services staff also responderportedd variability in the length of time it took that  
55 it took from one week to many months for CVIs to be sent to them, a finding

1  
2 confirmed by hospital administrative staff. Hospital workload and delays in  
3  
4 obtaining authorisation for the CVI were cited as key barriers. ∴  
5  
6

7  
8 'Sometimes (CVIs) are there for a while, sometimes varies.  
9

10 Another consultant who gets a lot, he has a quick turnaround, he  
11 fills out the bulk of them, get one day and then a day or two after  
12 that...Can sit on desks longer if they are away, week or a bit  
13 longer.' (Adm4)  
14  
15

16 'Between 10 days and three or four months.' (SS2)  
17

18 'Some received few days later, others take 3 months.' (SS4)  
19  
20

21  
22  
23  
24  
25  
26 Delays also ~~occur~~occurred as a result of incomplete CVIs being~~are~~ sent to  
27  
28 SSDs. One SS interviewee estimated half of the CVIs they receive have an  
29 incorrect or missing ~~the wrong or no~~ telephone number and this delayed the  
30 registration~~G&R~~ process.  
31  
32  
33  
34  
35

36  
37 'The ophthalmologist hasn't indicated whether the patient is  
38 considered SI or SSI or has omitted to sign it or a page could be  
39 missing altogether. When this happens we have to send the CVI  
40 back with a covering letter which delays disability registration and  
41 can delay services for the patient.' (SS5)  
42  
43  
44  
45

46  
47 'The standard of completion of CVIs is extraordinarily poor...You  
48 have to tick whether SSI or SI, quite regularly they'll have ticked  
49 the wrong box.' (SS11)  
50  
51  
52  
53  
54  
55  
56  
57  
58  
59  
60

1  
2 ~~An additional practice that unnecessarily delays sending certifications to SS is~~  
3 ~~waiting to send CVIs in batches. All SS staff (n=12) stated they received CVIs~~  
4 ~~in batches.~~

5  
6  
7  
8  
9  
10 ~~In each of the three areas, patients confirmed the length of time for them to go~~  
11 ~~through both C&R varied from a few weeks to close to one year. There was~~  
12 ~~also variation within each department, with some patients stating C&R took a~~  
13 ~~few weeks whilst others stated it took many months. An additional practice that~~  
14 ~~unnecessarily delays sending certifications to SS is waiting to send CVIs in~~  
15 ~~batches. All SS staff (n=12) stated they received CVIs in batches. Patients~~  
16 ~~also reported variations in the length of time it took social services to contact~~  
17 ~~and/or visit them. This was confirmed by interviews with social services staff.~~

18  
19  
20  
21  
22  
23  
24  
25  
26  
27  
28  
29  
30  
31  
32 'Apparently they were meant to put me in touch. I've been on a  
33 waiting list for nearly 4 months and nobody's got in touch with  
34 me...I'm still waiting; I'm still on a list.' (Pat42)

35  
36  
37  
38 'Sensory team used to be part of bigger team that had two admin  
39 workers, did have bigger team, now have part-time rehab, no  
40 admin, manager not in the building, massive change.' (SS6)

41  
42  
43  
44  
45  
46  
47 There were repercussions of these delays, close to half (20/46 patients,  
48 43%) stated they would have liked to have been offered certification  
49 earlier, to access support. The purpose of the CVI, to prompt access to  
50 holistic low vision and sensory support, is much valued by patients and  
51 many would benefit from being offered or receiving this support as early  
52 as possible.

### The role of clinic support staff and the ECLO

Each hospital eye clinic had an ECLO in post but the role of the ECLO in the certification and registration process differed in each hospital. The function of the ECLO was dictated largely by ~~The eye clinics differed in their approach to use of the ECLO service for certification and registration process. ECLOs helped complete the CVI in two areas, however one factor that contributed to the inconsistent certification process in hospitals was ophthalmologists' perception of the attitudes towards ECLO's role ECLOs.~~ All four ECLOs said ophthalmologists used them inconsistently. One consultant agreed;

'At the moment I keep forgetting (laughs). I'm meant to send to ECLO...He's not here for all of my clinics.' (Oph1)

The presence of an ECLO was viewed as beneficial by all patients and the majority of staff. Most ophthalmologists (N=9) agreed it was more cost-effective and a better use of their time if ECLOs helped to complete the CVI and participate in the certification process. Although the ECLOs said they were often used inconsistently by ophthalmologists.

'I must say that ECLO was brilliant. She talked us through what was going to happen, what we had to do, literally I didn't do much after that... I literally came out of the door and met ECLO, I'm glad she was there because you come out and you think right? What now? What does it mean? What do I do? How do I cope?



1  
2 And she was there. That made a huge difference to me....

3  
4 ECLO is the most wonderful person.' (Pat23)

5  
6  
7  
8  
9 'ECLO offered help...gave me time to think about it...and I

10  
11 needed time...she was very sympathetic and did her job

12  
13 beautifully.' (Pat2)

14  
15  
16  
17 ~~Three quarters of the ophthalmologists (N=9) agreed it would be~~

18 ~~cost-effective and would be better use of their time if ECLOs~~

19 ~~helped to complete the CVI (Part 3) and participate in the~~

20 ~~certification process;~~

21  
22  
23  
24  
25  
26  
27  
28 'Biggest positive for us has been the ECLO - irons out difficulties

29 in liaising with different agencies and informing the patients about

30 the benefits and the sources of help they can get. Made a big

31 difference in my practice.' (Oph10)

32  
33  
34  
35  
36  
37 ~~'I'm fairly senseless when it comes to a list of benefits they are~~

38 ~~entitled to, I think the ECLO is brilliant at explaining the other benefits~~

39 ~~like tax, entitled to this and that, parking.'~~ (Oph9)

40  
41  
42  
43  
44 ~~'(Completing CVI) does eat into clinic time, someone else can do it.'~~

45  
46  
47 ~~(Oph2)~~

48  
49  
50  
51 ~~The interviewed ophthalmologists identified difficulties in subjective~~

52 ~~interpretation of visual field defect and fluctuating visual function as potential~~

53 ~~reasons why the offer of certification may be delayed.~~

1  
2  
3  
4  
5  
6  
7  
8  
9  
10  
11  
12  
13  
14  
15  
16  
17  
18  
19  
20  
21  
22  
23  
24  
25  
26  
27  
28  
29  
30  
31  
32  
33  
34  
35  
36  
37  
38  
39  
40  
41  
42  
43  
44  
45  
46  
47  
48  
49  
50  
51  
52  
53  
54  
55  
56  
57  
58  
59  
60

~~'The whole issue itself is subjective... It depends on the clinician, assessing the visual field and interpreting that.'~~ (Oph10)

~~One ophthalmologist described the difficulty of certifying people with AMD, as with recent antiVEGF treatments visual improvement may be possible, and fluctuating visual acuity levels can influence certification process.~~

~~'People with AMD with injections go up and down like a yo-yo. Once they have reached certifiable level, a lot of time we couldn't do anything and historically we would have offered certification. Now they will have a few more injections, they get a little better.'~~  
(Oph11)

~~Similarly, some of the Consultants responded highlighting that similar issues in certifying patients with other eye conditions for example for patients with diabetic retinopathy<sup>(9)</sup>:~~

~~'We know with diabetics when you've got some degree of visual impairment you've also got peripheral field changes because of the diabetic retinopathy and the lasering – there's a whole mass of grey area in there.'~~ (Oph6)

~~Most ophthalmologists stated they based their decisions on when to offer certification on visual acuity: many did not consider a patient's functionality or the level of support a patient might need. Half of the ophthalmologists (n=6) admitted they relied only on quantitative visual function (acuity or field) when~~

1  
2 deciding whether or not to offer certification, they did not consider a patients'  
3 support needs.  
4

5  
6  
7  
8  
9 'making the decision, use visual acuity, based on visual fields, and then  
10 work out if eligible (Interviewer: Do you think about support at home?)  
11 You decide whether or not they are eligible and whether or not it will be of  
12 benefit for them is a separate issue.' (Oph8)  
13  
14  
15  
16

17  
18  
19 Some of the ophthalmologists (n=4) took account of a patient's practical visual  
20 needs when considering to offer certification.  
21  
22  
23

24  
25  
26 '(If patients) highlight particular problems they are  
27 having...problems with seeing dials for thermostats, looking for  
28 instructions for things, could do with help regarding lighting even,  
29 if they ever talk about safety issues like gas fires or cookers or  
30 have burnt themselves I tend to worry more about safety...I think  
31 of offering low vision support as a package.' (Oph1)  
32  
33  
34  
35  
36  
37  
38  
39

40  
41  
42 Similar to the majority of the ophthalmologists, all three nurses interviewed  
43 stated that visual function was a primary factor in their decision whether to  
44 recommend certification.  
45  
46  
47  
48

49  
50  
51 Consultants appeared more likely to offer certification at the end of their  
52 treatment, they (n=5) often described how they regard certification as the 'final  
53 stage' in the management of the eye condition;  
54  
55  
56  
57  
58  
59  
60

1  
2  
3  
4  
5  
6  
7  
8  
9  
10  
11  
12  
13  
14  
15  
16  
17  
18  
19  
20  
21  
22  
23  
24  
25  
26  
27  
28  
29  
30  
31  
32  
33  
34  
35  
36  
37  
38  
39  
40  
41  
42  
43  
44  
45  
46  
47  
48  
49  
50  
51  
52  
53  
54  
55  
56  
57  
58  
59  
60

~~'I think in practice (certification) does tend to coincide with an acknowledgement that there's little more that we can offer them medically...Certification can often form part of a process towards the end of a period of medical care and so it often coincides with their discharge from hospital or their discharge from a period of follow-up.'~~ (Oph5)

~~In contrast, patients very much regarded certification as a significant point in their treatment, stating it was the beginning of a stage of acceptance of their sight loss. The offer of certification was emotionally overwhelming for almost every patient interviewed (n=41); the help they received at this time vastly improved the quality of their lives.~~

~~Interviewer: 'Has registration helped you?'~~

~~Pat26: 'Absolutely, 100%.'~~

### **The patient benefit of certification and registration**

The certification and registration processes were an emotionally overwhelming time for almost all patients and they described the help they receive at this time as substantially improving their lives. The support offered as a result of being certified and registered changed lives and made patients more confident.

'I used to sit crying a great deal before these things started feeding through to me, from social services. I have a certain amount of confidence back...I lost all of that at one time.' (Pat37)

1  
2 'It's all about confidence, my confidence went to zero. The more  
3 things you can do for yourself, more confident with, makes your  
4 life better.' (Pat23)  
5  
6  
7  
8  
9

10 The practical assistance that resulted from certified and registered was  
11 also valued ~~most~~ by patients;  
12  
13

14  
15  
16  
17 'I faced my fear thinking I'd never walk in the dark anymore and  
18 thanks to social services(SS), they've trained me to walk in the  
19 dark.' (Pat14)  
20  
21  
22  
23

24  
25 [social services](SS) issued me with bus pass, made me more  
26 mobile, fold up white stick, recognition stick, helps an immense  
27 amount.' (Pat31)  
28  
29  
30  
31  
32

### 33 Improving the certification and registration process

34

35  
36  
37 Suggestions to improve certification and registration included initiatives to  
38 improve health professionals' level of awareness about the benefits of being  
39 certified and registered. In one area studied, the SSD worked collaboratively  
40 with consultants to improve patients' experiences of certification and  
41 registration.  
42  
43  
44  
45  
46  
47

48  
49  
50 Greater use of the ECLO was also a common theme suggested to improve the  
51 service. In one area social services said the number of incomplete forms  
52 decreased since an ECLO was employed, stating that previously 10-15% CVIs  
53 received would be sent back as they were incomplete. Ophthalmologists also  
54  
55  
56  
57  
58  
59  
60

1  
2 commented on the difference ECLOs make to providing accurate and detailed  
3 information to patients.  
4  
5

6  
7  
8 'I'm happy to provide what support I can but I'd readily agree that  
9 I don't have the time and I don't think I'm as good as the ECLO  
10 because I think most of us assume what patients want and need.  
11 We spend our lives making decisions for them with our expertise  
12 and experience...I don't have the time on the day...and the  
13 ECLO does and so wonderfully.' (Oph1)  
14  
15  
16  
17  
18  
19

20  
21  
22  
23 In many areas the third sector played a key role in providing support to patients  
24 who were extremely grateful for this assistance. Where support from SSDs took  
25 longer to arrive, the role of the voluntary sector was invaluable.  
26  
27  
28  
29

30  
31  
32 'We contacted Action for Blind and they helped filled out forms  
33 with... I've learned more from RNIB/Action than anyone else.'  
34 (Pat39)  
35  
36

37  
38 '...Age Concern was brilliant...people would be in a complete  
39 panic quite honestly if you were on your own and you had to  
40 come home on your own and then you suddenly got to cope with  
41 all this stuff.' (Pat5)  
42  
43  
44  
45  
46  
47  
48  
49  
50  
51  
52

## 53 Discussion

54  
55  
56 The aim of this current study research was to examine the process of sight loss  
57 certification and registration in three areas in England in order to identify  
58  
59  
60

1  
2 potential barriers and delays in timely certification and registration and possible  
3  
4 options for improving the service.  
5  
6  
7  
8  
9

10  
11 Despite the ageing population and predicted increases in those with sight loss,  
12 (179) the numbers of people certified each year with sight loss have declined in  
13 recent years, with the exception of the 12-months from April 2011 to March  
14 2012, which showed a marked increase on previous years. A significant  
15 geographical variation also exists across England in certification rates of  
16 blindness and sight impairment. (472) These variations in rates of certification  
17 and registration have been attributed to differences in the level at which  
18 certification is being offered, care pathways, perceived value of certification and  
19 registration and payment for CVI forms. However, this information is largely  
20 anecdotal and this is the only study to - directly explore the sight loss  
21 certification and registration pathways.  
22  
23  
24  
25  
26  
27  
28  
29  
30  
31  
32  
33  
34  
35  
36  
37  
38  
39  
40  
41  
42  
43  
44  
45  
46  
47  
48  
49  
50  
51  
52  
53  
54

55 In our study, the inconsistent decline in the number of certifications issued since  
56 the CVI was introduced in England in September 2005. Despite the ageing  
57 population and predicted increases in those with sight loss<sup>(10)</sup>, there has been  
58 an inconsistent decline in both the number of certifications and number of  
59 registrations. Between 2010/11 and 2011/12 there was a 4% increase in the  
60 number of certifications in England<sup>(10)</sup>. In contrast, between 2008/09 and 2009/10  
there was a 5% decrease in the number of certifications.<sup>(11)</sup>

55 In addition the decline in new blind registrations at regional level reveals wide  
56 variations in the numbers registered.<sup>(12)</sup>—The largest decline in new  
57  
58  
59  
60

1  
2  
3  
4  
5  
6  
7  
8  
9  
10  
11  
12  
13  
14  
15  
16  
17  
18  
19  
20  
21  
22  
23  
24  
25  
26  
27  
28  
29  
30  
31  
32  
33  
34  
35  
36  
37  
38  
39  
40  
41  
42  
43  
44  
45  
46  
47  
48  
49  
50  
51  
52  
53  
54  
55  
56  
57  
58  
59  
60

~~registrations was observed in the East Midlands, where new blind registrations decreased by 52%, while the smallest decline was in the North East – only 10% (See Figure 1).<sup>(12)</sup> Even in small geographical areas the number of CVIs and associated registrations varied widely, e.g. in inner London new registrations fell by 41% whereas in outer London the decrease was 24%.<sup>(12)</sup> Reasons for the inconsistent declines in certifications and registrations are poorly understood.<sup>(13)</sup>~~

~~Interviews with~~ ophthalmologists revealed they are often uncertain as to when to offer certification. For some patients it is clearly evident when their eye sight has reached the point to be certified but for others deciding when to certify is more ambiguous. Research finds higher under-registration in patients with treatable disease compared to those with untreatable disease.<sup>(184)</sup> The uncertainty of when to certify was also an issue for other eye conditions.<sup>(195)</sup> For example, certifying patients with atrophic AMD also presents significant timing difficulties.<sup>(20+6)</sup> These patients often experience severe sight loss after discharge but need to be referred back into the hospital eye service for certification when their vision declines. Introducing these patients to the ECLO/social services team before they are discharged will improve their access to relevant support services.

~~In addition, Some~~ ophthalmologists are unclear of the purpose of certification which may affect when they offer it to patients. Consultants may delay certifying patients as they regard certification as the *end of a clinical process* and wait to certify patients until they think they cannot offer any further medical treatments. Related to the issue of *when* to offer certification is the reason for offering it: the purpose of certification is to provide access to support for patients.<sup>(17)</sup>



1  
2 Certification and registration are not simply medical processes but a significant  
3  
4 step in patients' adjusting and accepting of their sight-loss. Interviews with  
5  
6 patients revealed the issuing of certification is often viewed as the beginning of  
7  
8 a new phase and a gateway to much needed support. In contrast, many  
9  
10 ophthalmologists regard certification as the end of the process but this attitude  
11  
12 can lead to patients needing support left without it. ~~f the 46 patients interviewed,~~  
13  
14 ~~20 stated they would have liked to have been offered certification earlier, to~~  
15  
16 ~~access support.~~  
17  
18  
19

20  
21  
22 There was variation in the certification process in each of the three areas and  
23  
24 the process used by each consultant differed within hospitals. The [Department](#)  
25  
26 [of Health](#) ~~H~~ recommends the CVI be sent to the local social services department  
27  
28 "within five working days".<sup>(2148)</sup> Across the three areas, interviews with hospital  
29  
30 and social services staff and patients revealed that only very rarely were CVIs  
31  
32 sent to SSDs within five days. It was much more common for CVIs to take  
33  
34 weeks or months to be sent [to SSDs](#). Previous research also found that delays  
35  
36 often occur when CVIs are sent to SSDs.<sup>(2249)</sup> Each administrator (n=8)  
37  
38 confirmed consultants can 'take a while' to return the CVI to their office. Another  
39  
40 significant delay is sending incomplete CVIs to SSDs; an unnecessary delay for  
41  
42 patients waiting for support.  
43  
44  
45  
46  
47

48  
49 These practices lengthen the [C&R certification and registration](#) processes,  
50  
51 making it more complicated and [unnecessarily](#) fraught for patients. In each of  
52  
53 the three areas studied, there were examples of good and bad practice and  
54  
55 stories of both grateful and frustrated patients, thus a good certification process  
56  
57 is achievable in ~~every aeh~~ department.  
58  
59  
60

1  
2  
3  
4 A more holistic approach to eye health is needed; health professionals,  
5 including registrars, ophthalmologists, optometrists and medical secretaries  
6 should improve their awareness of when certification should be offered and how  
7 certification benefits patients.<sup>(15)</sup> Any additional time needed for CVI discussion  
8 in clinic may not be readily available due to pressures on quantity (e.g. meeting  
9 Referral to Treatment guidance and other performance targets), therefore  
10 departments should explore if others, such as optometrists or ECLOs, are better  
11 placed to complete parts of the CVI. It should also be considered who is best  
12 placed to send completed CVIs quickly - ECLOs or secretaries or a designated  
13 administrator/team.  
14  
15  
16  
17  
18  
19  
20  
21  
22  
23  
24  
25  
26  
27

28 [Understanding how certification and registration operates at a local level will](#)  
29 [help commissioners and clinicians better understand the reasons for the](#)  
30 [variations in certification and registration rates and take steps to address the](#)  
31 [inconsistencies. Quantifying the barriers to timely certification and registration,](#)  
32 [and benchmarking against best practice will also help ensure the correct level of](#)  
33 [service provision, enabling health and social care commissioners to deliver](#)  
34 [consistent, high quality services based on an accurate assessment of need.](#)  
35  
36  
37  
38  
39  
40  
41  
42  
43  
44  
45

#### 46 **Limitations of research**

47  
48 [The interviews include only those who were certified, further research could](#)  
49 [examine patients who are eligible for certification but who either decline to be](#)  
50 [certified or are not offered it by clinicians. In addition, as the research used](#)  
51 [qualitative methods, we were able to interview a limited small number of](#)  
52 [health and social care professionals. Further research is needed to examine](#)  
53  
54  
55  
56  
57  
58  
59  
60

1  
2 | ~~look at~~ a wider range of departments over a longer period of time. Research is  
3  
4 | also needed to understand the impact of ~~the new~~ Disability Living Allowance  
5  
6 | assessment policies and whether there is any pressure on ophthalmologists not  
7  
8 | to certify patients.  
9

## 10 11 12 13 14 | **Discussion**

15  
16 | ~~The certification of vision impairment is inconsistently offered by~~  
17  
18 | ~~ophthalmologists. The uncertainty of when to certify may be contributing to the~~  
19  
20 | ~~decline in certifications. Many ophthalmologists regard certification as the end~~  
21  
22 | ~~of a process instead of regarding it as a formal route to support.~~  
23  
24

25  
26 | ~~Patients have both positive and negative experiences of certification. When the~~  
27  
28 | ~~C&R processes 'work', patients access support within weeks, however often~~  
29  
30 | ~~patients with vision impairment need and wish to access support before they are~~  
31  
32 | ~~offered certification.~~  
33  
34

35  
36 | ~~EGLOs play an important role in improving the C&R process, by making it more~~  
37  
38 | ~~efficient and improving the process for consultants. Ophthalmologists may wish~~  
39  
40 | ~~to consider their role beyond clinical care and utilise their skills better to offer the~~  
41  
42 | ~~appropriate support to their patients. Certification changes patients' lives;~~  
43  
44 | ~~ophthalmologists should acknowledge the significant role they play in helping~~  
45  
46 | ~~patients access support and improve their quality of life.~~  
47  
48  
49  
50  
51  
52  
53  
54  
55  
56  
57  
58  
59  
60

1  
2 TB wrote the initial draft. All authors revised the initial draft, FG revised the  
3  
4 subsequent drafts. TB and SL wrote the final draft. TB is the guarantor. All  
5  
6 authors have full control of the content of the article.  
7  
8  
9  
10  
11  
12  
13  
14  
15  
16  
17  
18  
19  
20  
21  
22  
23  
24  
25  
26  
27  
28  
29  
30  
31  
32  
33  
34  
35  
36  
37  
38  
39  
40  
41  
42  
43  
44  
45  
46  
47  
48  
49  
50  
51  
52  
53  
54  
55  
56  
57  
58  
59  
60

For peer review only

**Competing interests:**

None.

**Acknowledgements:**

Many thanks to the health professionals, representatives from social services and patients who participated in the interviews and took great courage in providing honest feedback on their experiences of the C&R process. Many thanks to the advisory group who provided guidance and advice.

**References**

- 1 RNIB. *Vision criteria for registration*. RNIB, 2014.  
[http://www.rnib.org.uk/livingwithsightloss/registeringsightloss/Pages/vision\\_criteria.aspx](http://www.rnib.org.uk/livingwithsightloss/registeringsightloss/Pages/vision_criteria.aspx) (Accessed 18 January 2014).
- 2 Department of Health. *Public Health Outcomes Framework 2013 to 2016 and technical updates*. DH, 2013.  
<https://www.gov.uk/government/publications/healthy-lives-healthy-people-improving-outcomes-and-supporting-transparency> (Accessed 18 January 2014).
- 3 RNIB. *Sight loss UK 2012 - The latest evidence*. RNIB, 2012.  
[http://www.rnib.org.uk/aboutus/Research/reports/otherresearch/Pages/sight\\_loss\\_uk.aspx](http://www.rnib.org.uk/aboutus/Research/reports/otherresearch/Pages/sight_loss_uk.aspx) (Accessed 17 January 2014)
- 4 Leamon S. *Number of adults and children certified with sight impairment and severe sight impairment in England and Wales: April 2008 – March 2009*. RNIB, 2012.  
[http://www.rnib.org.uk/aboutus/Research/reports/otherresearch/Pages/sight\\_loss\\_statistics\\_report.aspx](http://www.rnib.org.uk/aboutus/Research/reports/otherresearch/Pages/sight_loss_statistics_report.aspx) (Accessed 17 January 2014)
- 5 Leamon S. *Number of adults and children certified with sight impairment and severe sight impairment in England and Wales: April 2011-March 2012*. RNIB, 2013.  
[http://www.rnib.org.uk/aboutus/Research/reports/otherresearch/Pages/sight\\_loss\\_statistics\\_report.aspx](http://www.rnib.org.uk/aboutus/Research/reports/otherresearch/Pages/sight_loss_statistics_report.aspx) (Accessed 17 January 2014)
6. The NHS Information Centre, Adult Social Care Team. *Registered Blind and Partially Sighted People Year ending 31 March 2011, England*. NHS Information Centre, 2011.  
<http://www.hscic.gov.uk/pubs/blindpartiallysighted11> (Accessed 17 January 2014)
7. Malik ANJ, Bunce C, Wormald R, Suleman M, Stratton I, Muir Gray JA. Geographical variation in certification rates of blindness and sight impairment in

- 1  
2  
3  
4  
5  
6  
7  
8  
9  
10  
11  
12  
13  
14  
15  
16  
17  
18  
19  
20  
21  
22  
23  
24  
25  
26  
27  
28  
29  
30  
31  
32  
33  
34  
35  
36  
37  
38  
39  
40  
41  
42  
43  
44  
45  
46  
47  
48  
49  
50  
51  
52  
53  
54  
55  
56  
57  
58  
59  
60
- England, 2008–2009. *BMJOpen*. 2012; 2:e001496. doi:10.1136/bmjopen-2012-001496.
- 8 Britten N. Qualitative interviews in medical research. *BMJ* 1995; 311:251-3.
- 9 Boyce T. *The Certification and Registration Processes: Stages, barriers and delays*. RNIB, 2012.
- [http://www.rnib.org.uk/aboutus/Research/reports/earlyreach/Pages/certification\\_registration\\_processes.aspx](http://www.rnib.org.uk/aboutus/Research/reports/earlyreach/Pages/certification_registration_processes.aspx) (Accessed 17 January 2014).
- 10 McGuire LC. Remembering what the doctor said: Organization and adults - memory for medical information. *Exp. Aging Res* 1996;22:403–428.
- 11 McLean RJ, Windridge KC, Gottlob. Living with nystagmus: A qualitative study. *Br J Ophthalmol* 2012;96:981-986 doi:10.1136/bjophthalmol-2011-301183
- 12 Office for National Statistics. *Annual Mid-year Population Estimates, 2011 and 2012*. ONS, 2013.
- <http://www.ons.gov.uk/ons/rel/pop-estimate/population-estimates-for-uk--england-and-wales--scotland-and-northern-ireland/mid-2011-and-mid-2012/stb--mid-2011---mid-2012-uk-population-estimates.html#tab-Mid-2011-and-mid-2012-UK-population-estimates-> (Accessed 17 January 2014).
- 13 Office for National Statistics. *Population Estimates by Ethnic Group: Methodology Paper*. ONS, 2011.
- <http://www.ons.gov.uk/ons/taxonomy/index.html?nscl=Population+Estimates+by+Ethnic+Group> (Accessed 17 January 2014)
- 14 Miles MB, Huberman AM. *Qualitative data analysis: An expanded sourcebook (Second Edition)*. London: Sage Publications; 1994.
- 15 Morse JM, Field PA. *Qualitative research methods for health professionals (Second Edition)*. London: Sage Publications; 1995.
- 16 Maxwell JA. *Qualitative research design. An interactive approach (Second edition)*. London: Sage Publications; 2005.
- 17 Leamon S. *Number of adults and children certified with sight impairment in England and Wales: April 2011-March 2012*. RNIB, 2013.
- [http://www.rnib.org.uk/aboutus/Research/reports/otherresearch/Pages/sight\\_loss\\_statistics\\_report.aspx](http://www.rnib.org.uk/aboutus/Research/reports/otherresearch/Pages/sight_loss_statistics_report.aspx) (Accessed 17 January 2014).
- 18 Kotecha A, Fernandes S, Bunce C, Franks WA. Avoidable sight loss from glaucoma: is it unavoidable? *Br J Ophthalmol* 2012;96:816e820. doi:10.1136/bjophthalmol-2012-301499
- 19 Barry RJ, Murray PI. Unregistered visual impairment: is registration a failing system? *Br J Ophthalmol* 2005;89:995e8
- 20 Rostron E, McKibbin M. Visual impairment certification secondary to ARMD in Leeds, 2005–2010: is the incidence falling? *Eye* 2012;26:933-936.
- 21 Department of Health. *Certificate of Vision Impairment Explanatory Notes for Consultant Ophthalmologists and Hospital Eye Clinic Staff*. [https://www.gov.uk/government/uploads/system/uploads/attachment\\_data/file/127399/CVI-Explanatory-notes-in-DH-template.pdf.pdf](https://www.gov.uk/government/uploads/system/uploads/attachment_data/file/127399/CVI-Explanatory-notes-in-DH-template.pdf.pdf) (Accessed 17 January 2014).
- 22 Bunce C, Smyth L, Xing W, Zekite A (ND) *Research into drop in registrations of blind and partially sighted people*. (Supplied by first author, available from TB).

- 1 RNIB. *Sight loss UK 2012 - The latest evidence*. RNIB, 2012.  
[http://www.rnib.org.uk/aboutus/Research/reports/otherresearch/Pages/sight\\_loss\\_uk.aspx](http://www.rnib.org.uk/aboutus/Research/reports/otherresearch/Pages/sight_loss_uk.aspx) (accessed 7 July 2013).
- 2 Department of Health. *Public Health Outcomes Framework 2013 to 2016 and technical updates*. DH, 2013. <https://www.gov.uk/government/news/public-health-outcomes-framework-sets-out-desired-outcomes-and-supporting-transparency> (accessed 7 July 2013).
- 3 Boyce T. *The Certification and Registration Processes: Stages, barriers and delays*. RNIB, 2012.  
[http://www.rnib.org.uk/aboutus/Research/reports/otherresearch/Pages/certification\\_registration\\_processes.aspx](http://www.rnib.org.uk/aboutus/Research/reports/otherresearch/Pages/certification_registration_processes.aspx) (accessed 7 July 2013).
- 4 Britten N. Qualitative interviews in medical research. *BMJ* 1995; **311**:251-3.
- 4 McGuire LC. Remembering what the doctor said: Organization and adults' memory for medical information. *Exp. Aging Res* 1996; **22**:403-428.
- 5 McLean RJ, Windridge KC, Gottlob. Living with nystagmus: A qualitative study. *Br J Ophthalmol* 2012; **96**:981-986 doi:10.1136/bjophthalmol-2011-301183
- 6 Miles MB, Huberman AM. *Qualitative data analysis: An expanded sourcebook (Second Edition)*. London: Sage Publications; 1994.
- 7 Morse JM, Field PA. *Qualitative research methods for health professionals (Second Edition)*. London: Sage Publications; 1995.
- 8 Maxwell JA. *Qualitative research design. An interactive approach (Second edition)*. London: Sage Publications; 2005.
- 9 Barry RJ, Murray PI. Unregistered visual impairment: is registration a failing system? *Br J Ophthalmol* 2005; **89**:995e8

1  
2  
3  
4  
5  
6  
7  
8  
9  
10  
11  
12  
13  
14  
15  
16  
17  
18  
19  
20  
21  
22  
23  
24  
25  
26  
27  
28  
29  
30  
31  
32  
33  
34  
35  
36  
37  
38  
39  
40  
41  
42  
43  
44  
45  
46  
47  
48  
49  
50  
51  
52  
53  
54  
55  
56  
57  
58  
59  
60

10 Leamon S. *Number of adults and children certified with sight impairment in England and Wales: April 2011-March 2012*. RNIB, 2013.

[http://www.rnib.org.uk/aboutus/Research/reports/otherresearch/Pages/sight\\_loss\\_statistics\\_report.aspx](http://www.rnib.org.uk/aboutus/Research/reports/otherresearch/Pages/sight_loss_statistics_report.aspx) (accessed 7 July 2013).

11 Leamon S. *Number of adults and children certified with sight impairment in England and Wales: April 2010-March 2011*. RNIB, 2012.

[http://www.rnib.org.uk/aboutus/Research/reports/otherresearch/Pages/sight\\_loss\\_statistics\\_report.aspx](http://www.rnib.org.uk/aboutus/Research/reports/otherresearch/Pages/sight_loss_statistics_report.aspx) (accessed 7 July 2013)

12 Malik ANJ, Bunce C, Wormald R, Suleman M, Stratton I, Muir Gray JA.

Geographical variation in certification rates of blindness and sight impairment in England, 2008-2009. *BMJ Open*. 2012; 2:e001496. doi:10.1136/bmjopen-2012-001496.

13 Lake R. *A review of information needs and practice relating to people with sensory impairments*. NHS Information Centre, 2010.

14 Kotecha A, Fernandes S, Bunce C, Franks WA. Avoidable sight loss from glaucoma: is it unavoidable? *Br J Ophthalmol* 2012;96:816e820.

doi:10.1136/bjophthalmol-2012-301499

15 Barry RJ, Murray PI. Unregistered visual impairment: is registration a failing system? *Br J Ophthalmol* 2005;89:995e8

16 Rostron E, McKibbin M. Visual impairment certification secondary to ARMD in Leeds, 2005-2010: is the incidence falling? *Eye* 2012;26:933-936.

17 Department of Health. *Guidance published on registering a vision impairment as a disability*. <http://www.dh.gov.uk/health/2013/01/cvi/> (accessed 7 July 2013).

18 Health and Social Care Information Centre. *People Registered as Blind and Partially Sighted - England, 2006, Triennial*.

<http://www.ic.nhs.uk/article/2021/Website>



1  
2  
3  
4  
5  
6  
7  
8  
9  
10  
11  
12  
13  
14  
15  
16  
17  
18  
19  
20  
21  
22  
23  
24  
25  
26  
27  
28  
29  
30  
31  
32  
33  
34  
35  
36  
37  
38  
39  
40  
41  
42  
43  
44  
45  
46  
47  
48  
49  
50  
51  
52  
53  
54  
55  
56  
57  
58  
59  
60

[Search?productid=1885&q=blind+partially+sighted+2006&sort=Relevance&size=10  
&page=1&area=both#top](http://search.bmj.com/search?productid=1885&q=blind+partially+sighted+2006&sort=Relevance&size=10&page=1&area=both#top) (accessed 7 July 2013).

[19 Bunce C, Smyth L, Xing W, Zekite A \(ND\) Research into drop in registrations of blind and partially sighted people. \(Available from TB\).](#)

For peer review only

# BMJ Open

## Certification for vision impairment – Researching perceptions, processes and practicalities in health and social care professionals and patients

|                                 |                                                                                                                                                                                                                                                                       |
|---------------------------------|-----------------------------------------------------------------------------------------------------------------------------------------------------------------------------------------------------------------------------------------------------------------------|
| Journal:                        | <i>BMJ Open</i>                                                                                                                                                                                                                                                       |
| Manuscript ID:                  | bmjopen-2013-004319.R2                                                                                                                                                                                                                                                |
| Article Type:                   | Research                                                                                                                                                                                                                                                              |
| Date Submitted by the Author:   | 19-Mar-2014                                                                                                                                                                                                                                                           |
| Complete List of Authors:       | Boyce, Tammy; Imperial College, Medicine<br>Leamon, Shaun; Royal National Institute of Blind People,<br>Slade, John; RNIB,<br>Simkiss, Phillippa; RNIB, Judd Street<br>rughani, sonal; RNIB, Judd Street<br>Ghanchi, Faruque; Bradford Royal Infirmary, Ophthalmology |
| <b>Primary Subject Heading</b>: | Ophthalmology                                                                                                                                                                                                                                                         |
| Secondary Subject Heading:      | Qualitative research, Evidence based practice, Health policy, Medical education and training, Public health                                                                                                                                                           |
| Keywords:                       | Health policy < HEALTH SERVICES ADMINISTRATION & MANAGEMENT, Quality in health care < HEALTH SERVICES ADMINISTRATION & MANAGEMENT, OPHTHALMOLOGY, PREVENTIVE MEDICINE, QUALITATIVE RESEARCH                                                                           |
|                                 |                                                                                                                                                                                                                                                                       |

SCHOLARONE™  
Manuscripts

only

**Title:**

Certification for vision impairment – Researching perceptions, processes and practicalities in health and social care professionals and patients

**Keywords:**

Blindness; Visually Impaired Persons; Certification of Vision Impairment; Professional-Patient Relations

**Authors:**

Dr T Boyce (Corresponding)  
Department of Medicine  
Imperial College  
London

30 Victoria Park Rd East  
Cardiff  
CF5 1EH  
<tboyce@imperial.ac.uk>

Mr Shaun Leamon  
Royal National Institute of Blind People (RNIB)  
105 Judd Street  
London  
WC1H 9NE  
020 7388 1266

Mr J Slade  
RNIB  
105 Judd Street  
London  
WC1H 9NE  
020 7388 1266

Dr P Simkiss  
RNIB  
105 Judd Street  
London  
WC1H 9NE  
020 7388 1266

Ms S Rughani  
RNIB  
105 Judd Street  
London  
WC1H 9NE  
020 7388 1266

1  
2  
3 Mr Faruque Ghanchi  
4

5 Bradford Teaching Hospitals NHS Foundation Trust  
6 Duckworth Lane  
7 Bradford  
8 BD9 6RJ  
9 01274 382386  
10

## 11 12 13 14 **Abstract**

### 15 **Objectives**

16 To explore the patient experience , and the role of ophthalmologists and other  
17 health and social care professionals in the certification and registration  
18 processes and examine the main barriers to the timely certification of patients.  
19  
20

### 21 **Design**

22 Qualitative study.  
23  
24

### 25 **Setting**

26 Telephone interviews with health and social care professionals and patients in  
27 three areas in England.  
28  
29

### 30 **Participants**

31 43 health and social care professionals who are part of the certification or  
32 registration process. 46 patients certified as severely sight impaired (blind) or  
33 sight impaired (partially sighted) within the previous 12 months.  
34  
35

### 36 **Results**

37 Certification and registration is life changing for patients and the help they  
38 receive can substantially improve their lives. Despite this, ophthalmologists often  
39 found it difficult to ascertain when it is appropriate to certify patients, particularly  
40 for people with long term conditions. Ophthalmologists varied in their  
41 comprehension of the certification process and many regarded certification as  
42 the 'final stage' in treatment. Administrative procedures meant the process of  
43  
44  
45  
46  
47  
48  
49  
50  
51  
52  
53  
54  
55  
56  
57  
58  
59  
60

1  
2 certification and registration could vary from a few weeks to many months. The  
3  
4 avoidable delays in completing certification can be helped by Eye Clinic Liaison  
5  
6 Officers (ECLO).  
7  
8  
9

## 10 **Conclusion**

11  
12 A better understanding of the certification and registration processes can help  
13  
14 drive up standards of support and service provision for people who are severely  
15  
16 sighted impaired or sight impaired. Better education and support is required for  
17  
18 ophthalmologists in recognising the importance of timely referral for  
19  
20 rehabilitative support through certification and registration. ECLOs can improve  
21  
22 the process of certification and registration. Finally, better education is needed  
23  
24 for patients on the benefits of certification and registration.  
25  
26  
27  
28  
29  
30  
31

## 32 **Article summary**

### 33 **Strengths and limitations of this study**

- 34  
35  
36  
37  
38  
39  
40  
41  
42  
43  
44  
45  
46  
47  
48  
49  
50  
51  
52  
53  
54  
55  
56  
57  
58  
59  
60
- This is the first study to focus on all those involved in the certification and registration processes – various health and social care professionals as well as patients.
  - The research design includes areas with differing rates of certification demonstrating and showing the opportunities to improve practice to ensure the certification process is more consistent.
  - The number of participants was small, so findings should be considered indicative, however, saturation/repetition levels were reached in all three interview groups, suggesting confidence in the findings.

- 1
  - 2
  - 3
  - 4
  - 5
  - 6
  - 7
  - 8
  - 9
  - 10
  - 11
  - 12
  - 13
  - 14
  - 15
  - 16
  - 17
  - 18
  - 19
  - 20
  - 21
  - 22
  - 23
  - 24
  - 25
  - 26
  - 27
  - 28
  - 29
  - 30
  - 31
  - 32
  - 33
  - 34
  - 35
  - 36
  - 37
  - 38
  - 39
  - 40
  - 41
  - 42
  - 43
  - 44
  - 45
  - 46
  - 47
  - 48
  - 49
  - 50
  - 51
  - 52
  - 53
  - 54
  - 55
  - 56
  - 57
  - 58
  - 59
  - 60
- All patients were certified, further research including this group is needed to explore why these patients are declining certification.

For peer review only

## Introduction (count 3863)

The Certificate of Vision Impairment (CVI) was introduced in England in September 2005 and in Wales in April 2007. Its purpose is to provide a reliable route for someone with sight loss to be brought to the attention of social care. Certification and registration are two separate processes: an ophthalmologist completes the CVI based on existing visual function criteria and support needs and the hospital sends this to the patient's social services. Patients can be certified as sight impaired (SI – formerly 'partial sighted') or severe sight impairment (SSI – formerly 'blind') (see Table 1 for an overview of criteria). Local Social Service Department (SSDs) then initiate the registration process upon receipt of the completed CVI. Registration is voluntary; as such, SSDs ask patients if they would like to be registered. When patients are certified as either SSI or SI they are eligible for a range of support including: financial concessions (e.g. tax breaks, free NHS sight tests), welfare benefits and the loan of aids and equipment. Data collected by CVI also provides valuable epidemiological information on the prevalence of sight loss.

There is concern that the number of CVIs should be as accurate as possible as the Public Health Outcomes Framework in England, introduced in 2013, includes an indicator for preventable sight loss for the first time. The indicator aims to better target financial resources to improve early detection of the three major causes of sight loss (glaucoma, age related macular degeneration (AMD) and diabetic retinopathy).<sup>(2)</sup> As the CVI includes causes of vision impairment, it will provide a metric for levels of avoidable sight loss for the indicator. It is therefore important that the number and information in CVIs and subsequent registrations reflect accurate levels of need.

1  
2  
3  
4 However, evidence shows the numbers of certifications and registrations have  
5  
6 varied considerably over time and in many cases numbers have declined. This  
7  
8 is in addition to the increasing prevalence of sight loss accompanied by the  
9  
10 ageing population in the UK.<sup>(3)</sup> In the 12-months from April 2008 to March 2009,  
11  
12 the number of certifications was 23,773, a marked increase on the previous 12-  
13  
14 months.<sup>(4)</sup> Certifications then decreased in 2009/2010 and 2010/2011, before  
15  
16 rising to 23,616 in 2011/2012.<sup>(5)</sup> Similarly, the triennial survey of people  
17  
18 registered with Councils with Adult Social Services Responsibilities in England  
19  
20 as being SSI or SI showed an overall decrease in new registrations in  
21  
22 2010/2011 compared with 2008/2009.<sup>(6)</sup>

23  
24 Perhaps even more noteworthy is the large geographical variation found to exist  
25  
26 in rates of severe sight impairment and sight impairment, with an 11-fold  
27  
28 difference found to exist between the highest and lowest rate, according to  
29  
30 2008/2009 data.<sup>(7)</sup>

31  
32  
33  
34  
35  
36  
37  
38  
39  
40 This paper examines the certification and registration processes in hospitals and  
41  
42 social services departments and identifies the main barriers, delays and  
43  
44 enablers. It also explores the significance of certification and registration for  
45  
46 patients.

## 47 48 49 50 **Materials and Methods**

### 51 52 **Sample**

53  
54  
55  
56 A qualitative study was designed based on semi-structured telephone interviews  
57  
58 of clinical and social care providers and service users.<sup>(8)</sup> The study was



1  
2 undertaken in three separate areas of England identified as having fluctuating  
3  
4 rates of sight loss certification between 2006 and 2011<sup>(9)</sup>. NHS research ethics  
5  
6 approval was secured for each hospital site. 43 health and social care  
7  
8 professionals and 46 patients were interviewed by an experienced interviewer  
9  
10 (See Table 2). The term 'patient' is used throughout the report instead of 'client'  
11  
12 or 'service user'. This is for continuity and clarity.  
13  
14

15  
16  
17 Hospital and social services staff interviews were with: ophthalmologists,  
18  
19 optometrists and nurses working in ophthalmology departments, social services  
20  
21 rehabilitation officers, social services administrators, Eye Clinic Liaison Officers  
22  
23 (ECLOs) and hospital administration staff (See Table 2). All ophthalmologists  
24  
25 interviewed were consultants except one trainee registrar. Of the eleven  
26  
27 consultants interviewed, two were qualified for less than two years; the  
28  
29 remaining nine consultants were qualified for over ten years. Hospital  
30  
31 interviewees were identified by their head of department. Social care  
32  
33 interviewees were identified by ECLOs and a representative from local visual  
34  
35 impairment forums.  
36  
37  
38  
39

40  
41 Patients with vision impairment (and two primary carers) were interviewed.  
42  
43 Patients were identified by ECLOs or social services. As patients' recollections  
44  
45 of medical consultations can be poor within relatively short periods after a  
46  
47 consultation,<sup>(10)</sup> only patients certified within the last year were interviewed.  
48  
49 Interviewees included patients certified and registered (n = 32), those certified  
50  
51 only (n = 5) and those certified but unsure if they were registered (n = 9). A  
52  
53 sampling frame was created to direct patient recruitment. The sample frame  
54  
55  
56  
57  
58  
59  
60

1  
2 aimed to ensure a diversity of patients in terms of age, ethnicity, gender and  
3  
4 income.<sup>(11)</sup>  
5  
6  
7

8 Fifteen per cent (n = 7) of patients classified themselves as Asian, seven per  
9  
10 cent (n = 3) Black and the remainder White (n = 36). Forty-one per cent (n = 19)  
11  
12 stated they had an income below £15,000/annum. Sixty-three per cent (n = 29)  
13  
14 of patients were over 60 years of age and fifty-seven per cent (n = 26) were  
15  
16 women. Compared to national CVI figures, Black and Minority Ethnic patients  
17  
18 were over represented and the gender characteristics of the sample were  
19  
20 comparable with national demographics.<sup>(12, 13)</sup>  
21  
22  
23

### 24 **Interviews and Data Analysis**

25  
26  
27  
28 Semi-structured telephone interviews were conducted with individual  
29  
30 participants at a time that suited the interviewees. Interviews lasted on average  
31  
32 for 15 minutes; although some were substantially longer (patient interviews  
33  
34 ranged from 8-40 minutes, interviews with health/social care professionals  
35  
36 ranged from 6-50 minutes). Topics for discussion were predefined by the  
37  
38 consensus of the research steering group. Interviews with professionals sought  
39  
40 to explore: 1) knowledge and understanding of certification and registration; 2)  
41  
42 local pathways and the factors affecting certification and registration; 3) the role  
43  
44 of different health and social care professionals; and 4) the future of certification  
45  
46 and registration and suggestions for improvement. Interviews with patients  
47  
48 explored: 1) experiences of being certified and registered; 2) the impact of  
49  
50 certification and registration on the lives of patients and their families; 3) and  
51  
52 suggestions for improvement (See Box 1-3).  
53  
54  
55

|                                                   |
|---------------------------------------------------|
| 57 CVI process / when you recommend certification |
| 58 Purpose of CVI                                 |

1  
2  
3  
4  
5  
6  
7  
8  
9  
10  
11  
12  
13  
14  
15  
16  
17  
18  
19  
20  
21  
22  
23  
24  
25  
26  
27  
28  
29  
30  
31  
32  
33  
34  
35  
36  
37  
38  
39  
40  
41  
42  
43  
44  
45  
46  
47  
48  
49  
50  
51  
52  
53  
54  
55  
56  
57  
58  
59  
60

|                                                                                                                                                                                   |
|-----------------------------------------------------------------------------------------------------------------------------------------------------------------------------------|
| What you tell patients about CVI<br>Barriers to approaching patients<br>Length to complete CVI<br>Knowledge of benefits of being certified<br>Reasons for decline<br>Improvements |
|-----------------------------------------------------------------------------------------------------------------------------------------------------------------------------------|

Box 1: Themes in ophthalmology/optometrist/nurse questions

|                                                                                                          |
|----------------------------------------------------------------------------------------------------------|
| CVI process<br>Length from receiving CVI to sending to social services<br>Purpose of CVI<br>Improvements |
|----------------------------------------------------------------------------------------------------------|

Box 2: Themes in administrators/ ECLO questions

|                                                                                                             |
|-------------------------------------------------------------------------------------------------------------|
| Experiences of being certified and registered, length to complete<br>Access to support before certification |
|-------------------------------------------------------------------------------------------------------------|

Box 3: Themes in patient questions

Interview questions acted as a guide and additional information was also gleaned.

All interviews were recorded, transcribed and analysed using thematic analysis. A list of deductive codes was initially created; inductive codes emerged during the second level of the thematic analysis.<sup>(14,15,16)</sup>

The findings are illustrated with extracts from the interviews. Extracts are referenced with the type of interviewee and interview number – patient (Pat); ophthalmologist (Ophth); secretary/administrator (Adm); nurse (Nur); optometrist (Optom); Eye Clinic Liaison Officer (ECLO) social services staff (managers, rehabilitation officers, administrators) (SS).

It was observed that the terms ‘certification’ and ‘registration’ were used incorrectly and inconsistently by most interviewees; hence these terms were amended in the text to provide clarity.

## Results

The research findings are grouped into overarching themes. Despite the differences in size, location and demography of the three areas, there was considerable consistency in the findings. There were, however, local variations in the certification and registration processes.

### Knowledge and awareness of the purpose and benefits of certification and registration

Many health professionals were poorly informed about the purpose and benefits of certification and registration. Almost every health professional was unaware there was a difference between certification and registration. The terms 'certified' and 'registered' were interchanged throughout all interviews. Most health professionals assumed registration happened automatically once a patient was certified at the hospital.

'That's really weird. I thought if we certified the patients we automatically registered them with social services. I'm really surprised to hear that.' (Nur2)

Consequently, only a small number of health professionals were aware of what SSDs offered to certified and registered patients;

'(SS provide) enormous echelons of help, home visits, advice about lighting, advice about managing in home when you've got visual impairment, enormous levels of support that you don't need to be registered to get that support. Great to have ECLO to access this cause that's their expertise.' (Ophth6)

### Uncertainty when to certify the patient

The point at which certification was offered to patients varied between clinicians. The difference was less a geographic trend and more related to the individual clinician's approach.

Ophthalmologists identified difficulties in subjective interpretation of visual field defect and fluctuating visual function as potential reasons why the offer of certification may be inconsistent or delayed. Ophthalmologists also highlighted the impact of recent advancements in treatment on the decision of when to certify a patient.

'The whole issue itself is subjective... It depends on the clinician, assessing the visual field and interpreting that.' (Ophth10)

'People with AMD with injections go up and down... Once they have reached certifiable level, a lot of time we couldn't do anything and historically we would have offered certification. Now they will have a few more injections, they get a little better.'

(Ophth11)

Most ophthalmologists stated that they based their decisions on *when* to offer certification primarily on visual acuity; they did not consider the patient's functionality or the level of support they might need. Half of the ophthalmologists (n=6) reported relying solely on quantitative visual function (i.e. acuity or visual field).

1  
2  
3 In contrast, almost all optometrists and nurses interviewed considered a  
4  
5 patient's functionality when deciding whether or not to recommend certification;  
6  
7

8  
9 'I don't look at it from the medical point of view rather from the  
10  
11 social point of view. I do try to ask everybody who would fit the  
12  
13 criteria and I probably try to engage more the people maybe I  
14  
15 think would benefit from being registered, someone by  
16  
17 themselves, could do with help from social services.' (Nur2)  
18  
19

### 20 21 22 **Certification as the end of the process, not a route to services** 23

24  
25 Approximately half of the ophthalmologists (n=5) regarded certification as the  
26  
27 'final stage' in the management of a patient's condition, only offered to the  
28  
29 patient at the *end* of their treatment.  
30  
31

32  
33 'I think in practice (certification) does tend to coincide with an  
34  
35 acknowledgement that there's little more that we can offer them  
36  
37 medically...Certification can often form part of a process towards  
38  
39 the end of a period of medical care and so it often coincides with  
40  
41 their discharge from hospital or their discharge from a period of  
42  
43 follow-up.' (Ophth5).  
44  
45  
46  
47  
48

49  
50 In contrast, patients very much regarded certification as a significant point in  
51  
52 their treatment, stating it was the beginning of a stage of acceptance of their  
53  
54 sight loss. The offer of certification was emotionally overwhelming for almost  
55  
56 every patient interviewed (n=41); the help they received at this time vastly  
57  
58 improved the quality of their lives.  
59  
60

1  
2  
3  
4 Interviewer: 'Has registration helped you?'

5  
6 'Absolutely, 100%.' (Pat26)  
7  
8  
9

### 10 **Administrative barriers to certification and registration**

11  
12  
13  
14 The length of time to complete the certification and registration process varied  
15 within each area and across the three sites. Patients reported the length of time  
16 for them to go through certification and registration ranged from a few weeks to  
17 close to one year.  
18  
19  
20  
21  
22

23  
24  
25  
26 'It took quite a while, and for (hospital) to send out information  
27 like CVI and all that.' (Pat25)  
28  
29

30  
31  
32 'SS was a long time getting the information from the hospital...My  
33 son and daughter- in-law called them because no one contacted  
34 us.' (Pat26)  
35  
36  
37  
38  
39

40  
41 Social services staff also reported variability in the length of time it took for CVIs  
42 to be sent to them, a finding confirmed by hospital administrative staff. Hospital  
43 workload and delays in obtaining authorisation for the CVI were cited as key  
44 barriers.  
45  
46  
47  
48  
49

50  
51  
52 'Sometimes (CVIs) are there for a while, sometimes varies.

53  
54 Another consultant who gets a lot, he has a quick turnaround, he  
55 fills out the bulk of them, get one day and then a day or two after  
56  
57  
58  
59  
60

1  
2 that...Can sit on desks longer if they are away, week or a bit  
3  
4 longer.' (Adm4)  
5  
6  
7

8  
9 Delays also occurred as a result of incomplete CVIs being sent to SSDs. One  
10  
11 SS interviewee estimated half of the CVIs they receive have an incorrect or  
12  
13 missing telephone number and this delayed the registration process.  
14

15  
16  
17 'The ophthalmologist hasn't indicated whether the patient is  
18  
19 considered SI or SSI or has omitted to sign it or a page could be  
20  
21 missing altogether. When this happens we have to send the CVI  
22  
23 back with a covering letter which delays disability registration and  
24  
25 can delay services for the patient.' (SS5)  
26  
27

28  
29  
30 An additional practice that unnecessarily delays sending certifications to SS is  
31  
32 waiting to send CVIs in batches. All SS staff (n=12) stated they received CVIs  
33  
34 in batches. Patients also reported variations in the length of time it took social  
35  
36 services to contact and/or visit them. This was confirmed by interviews with  
37  
38 social services staff.  
39

40  
41  
42 'Apparently they were meant to put me in touch. I've been on a  
43  
44 waiting list for nearly 4 months and nobody's got in touch with  
45  
46 me...I'm still waiting; I'm still on a list.' (Pat42)  
47

48  
49 'Sensory team used to be part of bigger team that had two admin  
50  
51 workers, did have bigger team, now have part-time rehab, no  
52  
53 admin, manager not in the building, massive change.' (SS6)  
54  
55  
56  
57  
58  
59  
60



1  
2 There were repercussions of these delays, close to half (20/46 patients,  
3  
4 43%) stated they would have liked to have been offered certification  
5  
6 earlier, to access support. The purpose of the CVI, to prompt access to  
7  
8 holistic low vision and sensory support, is much valued by patients and  
9  
10 many would benefit from being offered or receiving this support as early  
11  
12 as possible.  
13

### 14 15 16 17 18 **The role of clinic support staff and the ECLO**

19  
20 Each hospital eye clinic had an ECLO in post but the role of the ECLO in the  
21  
22 certification and registration process differed in each hospital. The function of  
23  
24 the ECLO was dictated largely by ophthalmologists' perception of the ECLO's  
25  
26 role.  
27

28  
29  
30  
31 The presence of an ECLO was viewed as beneficial by all patients and the  
32  
33 majority of staff. Most ophthalmologists (N=9) agreed it was more cost-effective  
34  
35 and a better use of their time if ECLOs helped to complete the CVI and  
36  
37 participate in the certification process. Although the ECLOs said they were often  
38  
39 used inconsistently by ophthalmologists.  
40  
41  
42  
43

44  
45 'I must say that ECLO was brilliant. She talked us through what  
46  
47 was going to happen, what we had to do, literally I didn't do much  
48  
49 after that... I literally came out of the door and met ECLO... That  
50  
51 made a huge difference to me.' (Pat23)  
52  
53  
54  
55  
56  
57  
58  
59  
60

1  
2 'ECLO offered help...gave me time to think about it...and I  
3  
4 needed time...she was very sympathetic and did her job  
5  
6 beautifully.' (Pat2)  
7  
8  
9

10  
11 'I much prefer (sending patients to ECLO) because when you're  
12  
13 in a situation where you're seeing patients in clinical setting  
14  
15 you're under a lot of pressure because you've got a certain  
16  
17 number of patients to see and the time is ticking.' (Opt3)  
18  
19  
20

21  
22 'Biggest positive for us has been the ECLO - irons out difficulties  
23  
24 in liaising with different agencies and informing the patients about  
25  
26 the benefits and the sources of help they can get. Made a big  
27  
28 difference in my practice.' (Ophth10)  
29  
30  
31

### 32 33 **The patient benefit of certification and registration** 34

35 The certification and registration processes were an emotionally overwhelming  
36  
37 time for almost all patients and they described the help they receive at this time  
38  
39 as substantially improving their lives. The support offered as a result of being  
40  
41 certified and registered changed lives and made patients more confident.  
42  
43  
44

45  
46 'I used to sit crying a great deal before these things started  
47  
48 feeding through to me, from social services. I have a certain  
49  
50 amount of confidence back...I lost all of that at one time.' (Pat37)  
51  
52

53  
54 'It's all about confidence, my confidence went to zero. The more  
55  
56 things you can do for yourself, more confident with, makes your  
57  
58 life better.' (Pat23)  
59  
60

1  
2  
3 The practical assistance that resulted from certified and registered was  
4  
5 also valued by patients;  
6  
7  
8  
9

10 'I faced my fear thinking I'd never walk in the dark anymore and  
11  
12 thanks to social services, they've trained me to walk in the dark.'  
13

14 (Pat14)  
15  
16  
17  
18

19 '[social services] issued me with bus pass, made me more  
20  
21 mobile, fold up white stick, recognition stick, helps an immense  
22  
23 amount.' (Pat31)  
24  
25  
26

### 27 **Improving the certification and registration process**

28  
29

30  
31 Suggestions to improve certification and registration included initiatives to  
32  
33 improve health professionals' level of awareness about the benefits of being  
34  
35 certified and registered. In one area studied, the SSD worked collaboratively  
36  
37 with consultants to improve patients' experiences of certification and  
38  
39 registration.  
40  
41  
42

43  
44 Greater use of the ECLO was also a common theme suggested to improve the  
45  
46 service. In one area social services said the number of incomplete forms  
47  
48 decreased since an ECLO was employed, stating that previously 10-15% CVIs  
49  
50 received would be sent back as they were incomplete. Ophthalmologists also  
51  
52 commented on the difference ECLOs make to providing accurate and detailed  
53  
54 information to patients.  
55  
56  
57  
58  
59  
60

1  
2 'I'm happy to provide what support I can but I'd readily agree that  
3  
4 I don't have the time and I don't think I'm as good as the ECLO  
5  
6 because I think most of us assume what patients want and need.  
7  
8 We spend our lives making decisions for them with our expertise  
9  
10 and experience...I don't have the time on the day...and the  
11  
12 ECLO does and so wonderfully.' (Ophth1)  
13  
14  
15  
16  
17

18 In many areas the third sector played a key role in providing support to patients  
19  
20 who were extremely grateful for this assistance. Where support from SSDs took  
21  
22 longer to arrive, the role of the voluntary sector was invaluable.  
23  
24  
25

26 'We contacted Action for Blind and they helped filled out forms  
27  
28 with... I've learned more from RNIB/Action than anyone else.'  
29  
30 (Pat39)  
31  
32

33 '...Age Concern was brilliant...people would be in a complete  
34  
35 panic quite honestly if you were on your own and you had to  
36  
37 come home on your own and then you suddenly got to cope with  
38  
39 all this stuff.' (Pat5)  
40  
41  
42  
43

## 44 Discussion

45  
46  
47 The current study examined the process of sight loss certification and  
48  
49 registration in three areas in England in order to identify potential barriers and  
50  
51 delays in timely certification and registration and possible options for improving  
52  
53 the service.  
54  
55  
56  
57  
58  
59  
60

1  
2 Despite the ageing population and predicted increases in those with sight loss,  
3  
4 <sup>(17)</sup> the numbers of people certified each year with sight loss have declined in  
5  
6 recent years, with the exception of the 12-months from April 2011 to March  
7  
8 2012, which showed a marked increase on previous years. A significant  
9  
10 geographical variation also exists across England in certification rates of severe  
11  
12 sight impairment and sight impairment. <sup>(7)</sup> These variations in rates of  
13  
14 certification and registration have been attributed to differences in the level at  
15  
16 which certification is being offered, care pathways, perceived value of  
17  
18 certification and registration and payment for CVI forms. However, this  
19  
20 information is largely anecdotal and this is the only study to directly explore the  
21  
22 sight loss certification and registration pathways.  
23  
24  
25  
26  
27

28  
29 In our study, ophthalmologists revealed they are often uncertain as to when to  
30  
31 offer certification. For some patients it is clearly evident when their eye sight  
32  
33 has reached the point to be certified but for others deciding when to certify is  
34  
35 more ambiguous. Research finds higher under-registration in patients with  
36  
37 treatable disease compared to those with untreatable disease. <sup>(18)</sup> The  
38  
39 uncertainty of when to certify was also an issue for other eye conditions. <sup>(19)</sup> For  
40  
41 example, certifying patients with atrophic AMD also presents significant timing  
42  
43 difficulties. <sup>(20)</sup> These patients often experience severe sight loss after discharge  
44  
45 but need to be referred back into the hospital eye service for certification when  
46  
47 their vision declines. Introducing these patients to the ECLO/social services  
48  
49 team before they are discharged will improve their access to relevant support  
50  
51 services.  
52  
53  
54  
55  
56  
57  
58  
59  
60

1  
2 Some ophthalmologists are unclear of the purpose of certification which may  
3  
4 affect when they offer it to patients. Consultants may delay certifying patients as  
5  
6 they regard certification as the *end of a clinical process* and wait to certify  
7  
8 patients until they think they cannot offer any further medical treatments.  
9

10  
11 Related to the issue of *when* to offer certification is the reason for offering it: the  
12  
13 purpose of certification is to provide access to support for patients. Certification  
14  
15 and registration are not simply medical processes but a significant step in  
16  
17 patients' adjusting and accepting of their sight-loss. Interviews with patients  
18  
19 revealed the issuing of certification is often viewed as the beginning of a new  
20  
21 phase and a gateway to much needed support. In contrast, many  
22  
23 ophthalmologists regard certification as the end of the process but this attitude  
24  
25 can lead to patients needing support left without it.  
26  
27  
28  
29

30  
31 There was variation in the certification process in each of the three areas and  
32  
33 the process used by each consultant differed within hospitals. The Department  
34  
35 of Health recommends the CVI be sent to the local social services department  
36  
37 "within five working days".<sup>(21)</sup> Across the three areas, interviews with hospital  
38  
39 and social services staff and patients revealed that only very rarely were CVIs  
40  
41 sent to SSDs within five days. It was much more common for CVIs to take  
42  
43 weeks or months to be sent to SSDs. Previous research also found that delays  
44  
45 often occur when CVIs are sent to SSDs.<sup>(22)</sup> Each administrator (n=8) confirmed  
46  
47 consultants can 'take a while' to return the CVI to their office. Another significant  
48  
49 delay is sending incomplete CVIs to SSDs; an unnecessary delay for patients  
50  
51 waiting for support.  
52  
53  
54  
55  
56  
57  
58  
59  
60

1  
2 These practices lengthen the certification and registration processes, making it  
3  
4 more complicated and unnecessarily fraught for patients. In each of the three  
5  
6 areas studied, there were examples of good and bad practice and stories of  
7  
8 both grateful and frustrated patients, thus a good certification process is  
9  
10 achievable in every department.  
11  
12

13  
14  
15 A more holistic approach to eye health is needed; health professionals,  
16  
17 including registrars, ophthalmologists, optometrists and medical secretaries  
18  
19 should improve their awareness of when certification should be offered and how  
20  
21 certification benefits patients. Any additional time needed for CVI discussion in  
22  
23 clinic may not be readily available due to pressures on quantity (e.g. meeting  
24  
25 Referral to Treatment guidance and other performance targets), therefore  
26  
27 departments should explore if others, such as optometrists or ECLOs, are better  
28  
29 placed to complete parts of the CVI. It should also be considered who is best  
30  
31 placed to send completed CVIs quickly - ECLOs or secretaries or a designated  
32  
33 administrator/team.  
34  
35  
36  
37  
38  
39

40 Understanding how certification and registration operates at a local level will  
41  
42 help commissioners and clinicians better understand the reasons for the  
43  
44 variations in certification and registration rates and take steps to address the  
45  
46 inconsistencies. Quantifying the barriers to timely certification and registration,  
47  
48 and benchmarking against best practice will also help ensure the correct level of  
49  
50 service provision, enabling health and social care commissioners to deliver  
51  
52 consistent, high quality services based on an accurate assessment of need.  
53  
54  
55  
56

### 57 **Limitations of research**

58  
59  
60

1  
2 The interviews include only those who were certified, further research could  
3  
4 examine patients who are eligible for certification but who either decline to be  
5  
6 certified or are not offered it by clinicians. In addition, as the research used  
7  
8 qualitative methods, we were able to interview a limited number of health and  
9  
10 social care professionals. Further research is needed to examine a wider range  
11  
12 of departments over a longer period of time. Research is also needed to  
13  
14 understand the impact of the Disability Living Allowance assessment policies  
15  
16 and whether there is any pressure on ophthalmologists not to certify patients.  
17  
18  
19  
20  
21  
22

23  
24 TB wrote the initial draft. All authors revised the initial draft, FG revised the  
25  
26 subsequent drafts. TB and SL wrote the final draft. TB is the guarantor. All  
27  
28 authors have full control of the content of the article.  
29  
30  
31  
32  
33  
34  
35  
36  
37  
38  
39  
40  
41  
42  
43  
44  
45  
46  
47  
48  
49  
50  
51  
52  
53  
54  
55  
56  
57  
58  
59  
60



**Acknowledgements:**

Many thanks to the health professionals, representatives from social services and patients who participated in the interviews and took great courage in providing honest feedback on their experiences of the C&R process. Many thanks to the advisory group who provided guidance and advice.

**Funding statement**

The Royal National Institute of Blind People funded this research. The funders contributed to the design of the research.

**Contributorship Statement**

TB wrote the initial draft. All authors revised the initial draft, FG revised the subsequent drafts. TB and SL wrote the final draft. TB is the guarantor. All authors have full control of the content of the article.

**Competing interests:**

None.

**Data Sharing Statement**

No additional data

## References

- 1 RNIB. *Vision criteria for registration*. RNIB, 2014.  
[http://www.rnib.org.uk/livingwithsightloss/registeringsightloss/Pages/vision\\_criteria.aspx](http://www.rnib.org.uk/livingwithsightloss/registeringsightloss/Pages/vision_criteria.aspx) (Accessed 18 January 2014).
- 2 Department of Health. *Public Health Outcomes Framework 2013 to 2016 and technical updates*. DH, 2013.  
<https://www.gov.uk/government/publications/healthy-lives-healthy-people-improving-outcomes-and-supporting-transparency> (Accessed 18 January 2014).
- 3 RNIB. *Sight loss UK 2012 - The latest evidence*. RNIB, 2012.  
[http://www.rnib.org.uk/aboutus/Research/reports/otherresearch/Pages/sight\\_loss\\_uk.aspx](http://www.rnib.org.uk/aboutus/Research/reports/otherresearch/Pages/sight_loss_uk.aspx) (Accessed 17 January 2014)
- 4 Leamon S. *Number of adults and children certified with sight impairment and severe sight impairment in England and Wales: April 2008 – March 2009*. RNIB, 2012.  
[http://www.rnib.org.uk/aboutus/Research/reports/otherresearch/Pages/sight\\_loss\\_statistics\\_report.aspx](http://www.rnib.org.uk/aboutus/Research/reports/otherresearch/Pages/sight_loss_statistics_report.aspx) (Accessed 17 January 2014)
- 5 Leamon S. *Number of adults and children certified with sight impairment and severe sight impairment in England and Wales: April 2011-March 2012*. RNIB, 2013.  
[http://www.rnib.org.uk/aboutus/Research/reports/otherresearch/Pages/sight\\_loss\\_statistics\\_report.aspx](http://www.rnib.org.uk/aboutus/Research/reports/otherresearch/Pages/sight_loss_statistics_report.aspx) (Accessed 17 January 2014)
6. The NHS Information Centre, Adult Social Care Team. *Registered Blind and Partially Sighted People Year ending 31 March 2011, England*. NHS Information Centre, 2011.  
<http://www.hscic.gov.uk/pubs/blindpartiallysighted11> (Accessed 17 January 2014)
7. Malik ANJ, Bunce C, Wormald R, et al. Geographical variation in certification rates of blindness and sight impairment in England, 2008–2009. *BMJ Open*. 2012; 2:e001496. doi:10.1136/bmjopen-2012-001496.
- 8 Britten N. Qualitative interviews in medical research. *BMJ* 1995; 311:251-3.
- 9 Boyce T. *The Certification and Registration Processes: Stages, barriers and delays*. RNIB, 2012.  
[http://www.rnib.org.uk/aboutus/Research/reports/earlyreach/Pages/certification\\_registration\\_processes.aspx](http://www.rnib.org.uk/aboutus/Research/reports/earlyreach/Pages/certification_registration_processes.aspx) (Accessed 17 January 2014).
- 10 McGuire LC. Remembering what the doctor said: Organization and adults - memory for medical information. *Exp. Aging Res* 1996;22:403–428.
- 11 McLean RJ, Windridge KC, Gottlob. Living with nystagmus: A qualitative study. *Br J Ophthalmol* 2012;96:981-986 doi:10.1136/bjophthalmol-2011-301183
- 12 Office for National Statistics. *Annual Mid-year Population Estimates, 2011 and 2012*. ONS, 2013.  
<http://www.ons.gov.uk/ons/rel/pop-estimate/population-estimates-for-uk--england-and-wales--scotland-and-northern-ireland/mid-2011-and-mid-2012/stb--mid-2011---mid-2012-uk-population-estimates.html#tab-Mid-2011-and-mid-2012-UK-population-estimates-> (Accessed 17 January 2014).
- 13 Office for National Statistics. *Population Estimates by Ethnic Group: Methodology Paper*. ONS, 2011.  
<http://www.ons.gov.uk/ons/taxonomy/index.html?nscl=Population+Estimates+by+Ethnic+Group> (Accessed 17 January 2014)

- 1  
2 14 Miles MB, Huberman AM. *Qualitative data analysis: An expanded*  
3 *sourcebook (Second Edition)*. London: Sage Publications; 1994.  
4 15 Morse JM, Field PA. *Qualitative research methods for health professionals*  
5 *(Second Edition)*. London: Sage Publications; 1995.  
6 16 Maxwell JA. *Qualitative research design. An interactive approach (Second*  
7 *edition)*. London: Sage Publications; 2005.  
8 17 Leamon S. *Number of adults and children certified with sight impairment in*  
9 *England and Wales: April 2011-March 2012*. RNIB, 2013.  
10 [http://www.rnib.org.uk/aboutus/Research/reports/otherresearch/Pages/sight\\_loss\\_statistics\\_report.aspx](http://www.rnib.org.uk/aboutus/Research/reports/otherresearch/Pages/sight_loss_statistics_report.aspx) (Accessed 17 January 2014).  
11  
12 18 Kotecha A, Fernandes S, Bunce C, Franks WA. Avoidable sight loss from  
13 glaucoma: is it unavoidable? *Br J Ophthalmol* 2012;96:816e820.  
14 doi:10.1136/bjophthalmol-2012-301499  
15 19 Barry RJ, Murray PI. Unregistered visual impairment: is registration a failing  
16 system? *Br J Ophthalmol* 2005;89:995e8  
17 20 Rostron E, McKibbin M. Visual impairment certification secondary to ARMD  
18 in Leeds, 2005–2010: is the incidence falling? *Eye* 2012;26:933-936.  
19 21 Department of Health. *Certificate of Vision Impairment Explanatory Notes for*  
20 *Consultant Ophthalmologists and Hospital Eye Clinic Staff*.  
21 [https://www.gov.uk/government/uploads/system/uploads/attachment\\_data/file/127399/CVI-Explanatory-notes-in-DH-template.pdf](https://www.gov.uk/government/uploads/system/uploads/attachment_data/file/127399/CVI-Explanatory-notes-in-DH-template.pdf) (Accessed 17 January  
22 2014).  
23 22 Bunce C, Smyth L, Xing W, et al.(ND) *Research into drop in registrations of*  
24 *blind and partially sighted people*. (Supplied by first author, available from TB).  
25  
26  
27  
28  
29  
30  
31  
32  
33  
34  
35  
36  
37  
38

### 39 Table 1 Definitions of SI and SSI

40  
41  
42 To be registered as severely sight impaired (blind), sight has to fall into one of  
43 the following categories, while wearing any glasses or contact lenses that one  
44 may need:

- 45 • visual acuity of less than 3 / 60 with a full visual field
- 46 • visual acuity between 3 / 60 and 6 / 60 with a severe reduction of field of  
47 vision, such as tunnel vision
- 48 • visual acuity of 6 / 60 or above but with a very reduced field of vision,  
49 especially if a lot of sight is missing in the lower part of the field.

50  
51  
52 **To be registered as sight impaired (partially sighted) sight has to fall into**  
53 **one of the following categories, while wearing any glasses or contact**  
54 **lenses that one may need:**

- 55 • visual acuity of 3 / 60 to 6 / 60 with a full field of vision
- 56 • visual acuity of up to 6 / 24 with a moderate reduction of field of vision or with  
57 a central part of vision that is cloudy or blurry

- 1  
2  
3  
4  
5  
6  
7  
8  
9  
10  
11  
12  
13  
14  
15  
16
- visual acuity of up to 6 / 18 if a large part of your field of vision, for example a whole half of your vision, is missing or a lot of your peripheral vision is missing.<sup>(1)</sup>

17  
18  
19  
20  
21  
22  
23  
24  
25  
26  
27  
28  
29  
30  
31  
32  
33  
34  
35  
36  
37  
38  
39  
40  
41  
42  
43  
44  
45  
46  
47  
48  
49  
50  
51  
52  
53  
54  
55  
56  
57  
58  
59  
60

Further information on CVI can be found on the Royal College of Ophthalmology webpage: <<http://www.rcophth.ac.uk/page.asp?section=851&search=>>>.

Table 2. Number of interviews by type and area

| Area A            | Area B            | Area C            |
|-------------------|-------------------|-------------------|
| 10 Hospital Staff | 13 Hospital staff | 8 Hospital staff  |
| 1 Social Services | 9 Social Services | 2 Social services |
| 15 Patients       | 15 Patients       | 16 Patients       |
| Total: 26         | Total: 37         | Total: 26         |

**Title:**

Certification for vision impairment – Researching perceptions, processes and practicalities in health and social care professionals and patients

**Keywords:**

Blindness; Visually Impaired Persons; Certification of Vision Impairment; Professional-Patient Relations

**Authors:**

Dr T Boyce (Corresponding)  
Department of Medicine  
Imperial College  
London

30 Victoria Park Rd East  
Cardiff  
CF5 1EH  
<tboyce@imperial.ac.uk>

Mr Shaun Leamon  
Royal National Institute of Blind People (RNIB)  
105 Judd Street  
London  
WC1H 9NE  
020 7388 1266

Mr J Slade  
RNIB  
105 Judd Street  
London  
WC1H 9NE  
020 7388 1266

Dr P Simkiss  
RNIB  
105 Judd Street  
London  
WC1H 9NE  
020 7388 1266

Ms S Rughani  
RNIB  
105 Judd Street  
London  
WC1H 9NE  
020 7388 1266

1  
2 Mr Faruque Ghanchi  
3

4 Bradford Teaching Hospitals NHS Foundation Trust  
5 Duckworth Lane  
6 Bradford  
7 BD9 6RJ  
8 01274 382386  
9

## 10 11 12 13 **Abstract**

### 14 **Objectives**

15  
16 To explore the patient experience , and the role of ophthalmologists and other  
17 health and social care professionals in the certification and registration  
18 processes and examine the main barriers to the timely certification of patients.  
19  
20  
21  
22  
23

### 24 **Design**

25  
26 Qualitative study.  
27

### 28 **Setting**

29  
30 Telephone interviews with health and social care professionals and patients in  
31 three areas in England.  
32  
33  
34

### 35 **Participants**

36  
37 43 health and social care professionals who are part of the certification or  
38 registration process. 46 patients certified as severely sight impaired (blind) or  
39 sight impaired (partially sighted) within the previous 12 months.  
40  
41  
42  
43

### 44 **Results**

45  
46 Certification and registration is life changing for patients and the help they  
47 receive can substantially improve their lives. Despite this, ophthalmologists often  
48 found it difficult to ascertain when it is appropriate to certify patients, particularly  
49 for people with long term conditions. Ophthalmologists varied in their  
50 comprehension of the certification process and many regarded certification as  
51 the 'final stage' in treatment. Administrative procedures meant the process of  
52  
53  
54  
55  
56  
57  
58  
59  
60

1 certification and registration could vary from a few weeks to many months. The  
2  
3 avoidable delays in completing certification can be helped by Eye Clinic Liaison  
4  
5 Officers (ECLO).  
6  
7  
8  
9

## 10 **Conclusion**

11 A better understanding of the certification and registration processes can help  
12  
13 drive up standards of support and service provision for people who are severely  
14  
15 sighted impaired or sight impaired. Better education and support is required for  
16  
17 ophthalmologists in recognising the importance of timely referral for  
18  
19 rehabilitative support through certification and registration. ECLOs can improve  
20  
21 the process of certification and registration. Finally, better education is needed  
22  
23 for patients on the benefits of certification and registration.  
24  
25  
26  
27  
28  
29  
30  
31

## 32 **Article summary**

### 33 **Strengths and limitations of this study**

- 34  
35  
36  
37  
38 • This is the first study to focus on all those involved in the certification and  
39 registration processes – various health and social care professionals as  
40 well as patients.  
41  
42
- 43  
44  
45 • The research design includes areas with differing rates of certification  
46 demonstrating and showing the opportunities to improve practice to  
47 ensure the certification process is more consistent.  
48  
49
- 50  
51  
52 • The number of participants was small, so findings should be considered  
53 indicative, however, saturation/repetition levels were reached in all three  
54 interview groups, suggesting confidence in the findings.  
55  
56  
57  
58  
59  
60

- 1  
2  
3  
4  
5  
6  
7
- All patients were certified, further research including this group is needed to explore why these patients are declining certification.

8  
9

### **Funding statement**

10  
11  
12  
13  
14

The Royal National Institute of Blind People funded this research. The funders contributed to the design of the research.

15  
16  
17  
18  
19  
20  
21  
22  
23  
24  
25  
26  
27  
28  
29  
30  
31  
32  
33  
34  
35  
36  
37  
38  
39  
40  
41  
42  
43  
44  
45  
46  
47  
48  
49  
50  
51  
52  
53  
54  
55  
56  
57  
58  
59  
60

For peer review only



## Introduction (count 3863)

The Certificate of Vision Impairment (CVI) was introduced in England in September 2005 and in Wales in April 2007. Its purpose is to provide a reliable route for someone with sight loss to be brought to the attention of social care. Certification and registration are two separate processes: an ophthalmologist completes the CVI based on existing visual function criteria and support needs and the hospital sends this to the patient's social services. Patients can be certified as sight impaired (SI – formerly 'partial sighted') or severe sight impairment (SSI – formerly 'blind') (see Table 1 for an overview of criteria). Local Social Service Department (SSDs) then initiate the registration process upon receipt of the completed CVI. Registration is voluntary; as such, SSDs ask patients if they would like to be registered. When patients are certified as either SSI or SI they are eligible for a range of support including: financial concessions (e.g. tax breaks, free NHS sight tests), welfare benefits and the loan of aids and equipment. Data collected by CVI also provides valuable epidemiological information on the prevalence of sight loss.

There is concern that the number of CVIs should be as accurate as possible as the Public Health Outcomes Framework in England, introduced in 2013, includes an indicator for preventable sight loss for the first time. The indicator aims to better target financial resources to improve early detection of the three major causes of sight loss (glaucoma, age related macular degeneration (AMD) and diabetic retinopathy).<sup>(2)</sup> As the CVI includes causes of vision impairment, it will provide a metric for levels of avoidable sight loss for the indicator. It is therefore important that the number and information in CVIs and subsequent registrations reflect accurate levels of need.

1  
2  
3  
4 However, evidence shows the numbers of certifications and registrations have  
5  
6 varied considerably over time and in many cases numbers have declined. This  
7  
8 is in addition to the increasing prevalence of sight loss accompanied by the  
9  
10 ageing population in the UK.<sup>(3)</sup> In the 12-months from April 2008 to March 2009,  
11  
12 the number of certifications was 23,773, a marked increase on the previous 12-  
13  
14 months.<sup>(4)</sup> Certifications then decreased in 2009/2010 and 2010/2011, before  
15  
16 rising to 23,616 in 2011/2012.<sup>(5)</sup> Similarly, the triennial survey of people  
17  
18 registered with Councils with Adult Social Services Responsibilities in England  
19  
20 as being **SSI or SI** showed an overall **decrease** in new registrations in  
21  
22 2010/2011 compared with 2008/2009.<sup>(6)</sup>

23  
24 Perhaps even more noteworthy is the large geographical variation found to exist  
25  
26 in rates of **severe sight impairment** and sight impairment, with an 11-fold  
27  
28 difference found to exist between the highest and lowest rate, according to  
29  
30 2008/2009 data.<sup>(7)</sup>

31  
32  
33  
34  
35  
36  
37  
38  
39  
40 This paper examines the certification and registration processes in hospitals and  
41  
42 social services departments and identifies the main barriers, delays and  
43  
44 enablers. It also explores the significance of certification and registration for  
45  
46 patients.

## 50 **Materials and Methods**

### 53 **Sample**

54  
55  
56  
57 A qualitative study was designed based on semi-structured telephone interviews  
58  
59 of clinical and social care providers and service users.<sup>(8)</sup> The study was

1  
2 undertaken in three separate areas of England identified as having fluctuating  
3  
4 rates of sight loss certification between 2006 and 2011<sup>(9)</sup>. NHS research ethics  
5  
6 approval was secured for each hospital site. 43 health and social care  
7  
8 professionals and 46 patients were interviewed by an experienced interviewer  
9  
10 (See Table 2). The term 'patient' is used throughout the report instead of 'client'  
11  
12 or 'service user'. This is for continuity and clarity.  
13  
14

15  
16  
17 Hospital and social services staff interviews were with: ophthalmologists,  
18  
19 optometrists and nurses working in ophthalmology departments, social services  
20  
21 rehabilitation officers, social services administrators, Eye Clinic Liaison Officers  
22  
23 (ECLOs) and hospital administration staff (See Table 2). All ophthalmologists  
24  
25 interviewed were consultants except one trainee registrar. Of the eleven  
26  
27 consultants interviewed, two were qualified for less than two years; the  
28  
29 remaining nine consultants were qualified for over ten years. Hospital  
30  
31 interviewees were identified by their head of department. Social care  
32  
33 interviewees were identified by ECLOs and a representative from local visual  
34  
35 impairment forums.  
36  
37  
38  
39

40  
41 Patients with vision impairment (and two primary carers) were interviewed.  
42  
43 Patients were identified by ECLOs or social services. As patients' recollections  
44  
45 of medical consultations can be poor within relatively short periods after a  
46  
47 consultation,<sup>(10)</sup> only patients certified within the last year were interviewed.  
48  
49 Interviewees included patients certified and registered (n = 32), those certified  
50  
51 only (n = 5) and those certified but unsure if they were registered (n = 9). A  
52  
53 sampling frame was created to direct patient recruitment. The sample frame  
54  
55  
56  
57  
58  
59  
60

1  
2 aimed to ensure a diversity of patients in terms of age, ethnicity, gender and  
3  
4 income.<sup>(11)</sup>  
5  
6  
7

8 Fifteen per cent (n = 7) of patients classified themselves as Asian, seven per  
9  
10 cent (n = 3) Black and the remainder White (n = 36). Forty-one per cent (n = 19)  
11  
12 stated they had an income below £15,000/annum. Sixty-three per cent (n = 29)  
13  
14 of patients were over 60 years of age and fifty-seven per cent (n = 26) were  
15  
16 women. Compared to national CVI figures, Black and Minority Ethnic patients  
17  
18 were over represented and the gender characteristics of the sample were  
19  
20 comparable with national demographics.<sup>(12, 13)</sup>  
21  
22  
23

## 24 **Interviews and Data Analysis**

25  
26  
27  
28 Semi-structured telephone interviews were conducted with individual  
29  
30 participants at a time that suited the interviewees. Interviews lasted on average  
31  
32 for 15 minutes; although some were substantially longer (patient interviews  
33  
34 ranged from 8-40 minutes, interviews with health/social care professionals  
35  
36 ranged from 6-50 minutes). Topics for discussion were predefined by the  
37  
38 consensus of the research steering group. Interviews with professionals sought  
39  
40 to explore: 1) knowledge and understanding of certification and registration; 2)  
41  
42 local pathways and the factors affecting certification and registration; 3) the role  
43  
44 of different health and social care professionals; and 4) the future of certification  
45  
46 and registration and suggestions for improvement. Interviews with patients  
47  
48 explored: 1) experiences of being certified and registered; 2) the impact of  
49  
50 certification and registration on the lives of patients and their families; 3) and  
51  
52 suggestions for improvement (See Box 1-3).  
53  
54  
55

|                                                   |
|---------------------------------------------------|
| 57 CVI process / when you recommend certification |
| 58 Purpose of CVI                                 |

1  
2  
3  
4  
5  
6  
7  
8  
9  
10  
11  
12  
13  
14  
15  
16  
17  
18  
19  
20  
21  
22  
23  
24  
25  
26  
27  
28  
29  
30  
31  
32  
33  
34  
35  
36  
37  
38  
39  
40  
41  
42  
43  
44  
45  
46  
47  
48  
49  
50  
51  
52  
53  
54  
55  
56  
57  
58  
59  
60

|                                                                                                                                                                                   |
|-----------------------------------------------------------------------------------------------------------------------------------------------------------------------------------|
| What you tell patients about CVI<br>Barriers to approaching patients<br>Length to complete CVI<br>Knowledge of benefits of being certified<br>Reasons for decline<br>Improvements |
|-----------------------------------------------------------------------------------------------------------------------------------------------------------------------------------|

Box 1: Themes in ophthalmology/optometrist/nurse questions

|                                                                                                          |
|----------------------------------------------------------------------------------------------------------|
| CVI process<br>Length from receiving CVI to sending to social services<br>Purpose of CVI<br>Improvements |
|----------------------------------------------------------------------------------------------------------|

Box 2: Themes in administrators/ ECLO questions

|                                                                                                             |
|-------------------------------------------------------------------------------------------------------------|
| Experiences of being certified and registered, length to complete<br>Access to support before certification |
|-------------------------------------------------------------------------------------------------------------|

Box 3: Themes in patient questions

Interview questions acted as a guide and additional information was also gleaned.

All interviews were recorded, transcribed and analysed using thematic analysis. A list of deductive codes was initially created; inductive codes emerged during the second level of the thematic analysis.<sup>(14,15,16)</sup>

The findings are illustrated with extracts from the interviews. Extracts are referenced with the type of interviewee and interview number – patient (Pat); ophthalmologist (Ophth); secretary/administrator (Adm); nurse (Nur); optometrist (Optom); Eye Clinic Liaison Officer (ECLO) social services staff (managers, rehabilitation officers, administrators) (SS).

It was observed that the terms ‘certification’ and ‘registration’ were used incorrectly and inconsistently by most interviewees; hence these terms were amended in the text to provide clarity.

## Results

The research findings are grouped into overarching themes. Despite the differences in size, location and demography of the three areas, there was considerable consistency in the findings. There were, however, local variations in the certification and registration processes.

### Knowledge and awareness of the purpose and benefits of certification and registration

Many health professionals were poorly informed about the purpose and benefits of certification and registration. Almost every health professional was unaware there was a difference between certification and registration. The terms 'certified' and 'registered' were interchanged throughout all interviews. Most health professionals assumed registration happened automatically once a patient was certified at the hospital.

'That's really weird. I thought if we certified the patients we automatically registered them with social services. I'm really surprised to hear that.' (Nur2)

Consequently, only a small number of health professionals were aware of what SSDs offered to certified and registered patients;

'(SS provide) enormous echelons of help, home visits, advice about lighting, advice about managing in home when you've got visual impairment, enormous levels of support that you don't need to be registered to get that support. Great to have ECLO to access this cause that's their expertise.' (Ophth6)

## Uncertainty when to certify the patient

The point at which certification was offered to patients varied between clinicians. The difference was less a geographic trend and more related to the individual clinician's approach.

Ophthalmologists identified difficulties in subjective interpretation of visual field defect and fluctuating visual function as potential reasons why the offer of certification may be inconsistent or delayed. Ophthalmologists also highlighted the impact of recent advancements in treatment on the decision of when to certify a patient.

'The whole issue itself is subjective... It depends on the clinician, assessing the visual field and interpreting that.' (Ophth10)

'People with AMD with injections go up and down... Once they have reached certifiable level, a lot of time we couldn't do anything and historically we would have offered certification. Now they will have a few more injections, they get a little better.'

(Ophth11)

Most ophthalmologists stated that they based their decisions on *when* to offer certification primarily on visual acuity; they did not consider the patient's functionality or the level of support they might need. Half of the ophthalmologists (n=6) reported relying solely on quantitative visual function (i.e. acuity or visual field).

1  
2  
3 In contrast, almost all optometrists and nurses interviewed considered a  
4  
5 patient's functionality when deciding whether or not to recommend certification;  
6  
7

8  
9 'I don't look at it from the medical point of view rather from the  
10  
11 social point of view. I do try to ask everybody who would fit the  
12  
13 criteria and I probably try to engage more the people maybe I  
14  
15 think would benefit from being registered, someone by  
16  
17 themselves, could do with help from social services.' (Nur2)  
18  
19

### 20 21 22 **Certification as the end of the process, not a route to services** 23

24  
25 Approximately half of the ophthalmologists (n=5) regarded certification as the  
26  
27 'final stage' in the management of a patient's condition, only offered to the  
28  
29 patient at the *end* of their treatment.  
30  
31

32  
33 'I think in practice (certification) does tend to coincide with an  
34  
35 acknowledgement that there's little more that we can offer them  
36  
37 medically...Certification can often form part of a process towards  
38  
39 the end of a period of medical care and so it often coincides with  
40  
41 their discharge from hospital or their discharge from a period of  
42  
43 follow-up.' (Ophth5).  
44  
45  
46  
47  
48

49  
50 In contrast, patients very much regarded certification as a significant point in  
51  
52 their treatment, stating it was the beginning of a stage of acceptance of their  
53  
54 sight loss. The offer of certification was emotionally overwhelming for almost  
55  
56 every patient interviewed (n=41); the help they received at this time vastly  
57  
58 improved the quality of their lives.  
59  
60



1  
2  
3  
4 Interviewer: 'Has registration helped you?'

5  
6 'Absolutely, 100%.' (Pat26)  
7  
8  
9

### 10 **Administrative barriers to certification and registration**

11  
12  
13  
14 The length of time to complete the certification and registration process varied  
15 within each area and across the three sites. Patients reported the length of time  
16 for them to go through certification and registration ranged from a few weeks to  
17 close to one year.  
18  
19  
20  
21  
22

23  
24  
25  
26 'It took quite a while, and for (hospital) to send out information  
27 like CVI and all that.' (Pat25)  
28  
29

30  
31  
32 'SS was a long time getting the information from the hospital...My  
33 son and daughter- in-law called them because no one contacted  
34 us.' (Pat26)  
35  
36  
37  
38  
39

40  
41 Social services staff also reported variability in the length of time it took for CVIs  
42 to be sent to them, a finding confirmed by hospital administrative staff. Hospital  
43 workload and delays in obtaining authorisation for the CVI were cited as key  
44 barriers.  
45  
46  
47  
48  
49

50  
51  
52 'Sometimes (CVIs) are there for a while, sometimes varies.

53  
54 Another consultant who gets a lot, he has a quick turnaround, he  
55 fills out the bulk of them, get one day and then a day or two after  
56  
57  
58  
59  
60

1  
2 that...Can sit on desks longer if they are away, week or a bit  
3  
4 longer.' (Adm4)  
5  
6  
7

8  
9 Delays also occurred as a result of incomplete CVIs being sent to SSDs. One  
10  
11 SS interviewee estimated half of the CVIs they receive have an incorrect or  
12  
13 missing telephone number and this delayed the registration process.  
14

15  
16  
17 'The ophthalmologist hasn't indicated whether the patient is  
18  
19 considered SI or SSI or has omitted to sign it or a page could be  
20  
21 missing altogether. When this happens we have to send the CVI  
22  
23 back with a covering letter which delays disability registration and  
24  
25 can delay services for the patient.' (SS5)  
26  
27

28  
29  
30  
31 An additional practice that unnecessarily delays sending certifications to SS is  
32  
33 waiting to send CVIs in batches. All SS staff (n=12) stated they received CVIs  
34  
35 in batches. Patients also reported variations in the length of time it took social  
36  
37 services to contact and/or visit them. This was confirmed by interviews with  
38  
39 social services staff.  
40

41  
42 'Apparently they were meant to put me in touch. I've been on a  
43  
44 waiting list for nearly 4 months and nobody's got in touch with  
45  
46 me...I'm still waiting; I'm still on a list.' (Pat42)  
47

48  
49 'Sensory team used to be part of bigger team that had two admin  
50  
51 workers, did have bigger team, now have part-time rehab, no  
52  
53 admin, manager not in the building, massive change.' (SS6)  
54  
55  
56  
57  
58  
59  
60

1  
2 There were repercussions of these delays, close to half (20/46 patients,  
3  
4 43%) stated they would have liked to have been offered certification  
5  
6 earlier, to access support. The purpose of the CVI, to prompt access to  
7  
8 holistic low vision and sensory support, is much valued by patients and  
9  
10 many would benefit from being offered or receiving this support as early  
11  
12 as possible.  
13

### 14 15 16 17 18 **The role of clinic support staff and the ECLO**

19  
20 Each hospital eye clinic had an ECLO in post but the role of the ECLO in the  
21  
22 certification and registration process differed in each hospital. The function of  
23  
24 the ECLO was dictated largely by ophthalmologists' perception of the ECLO's  
25  
26 role.  
27

28  
29  
30  
31 The presence of an ECLO was viewed as beneficial by all patients and the  
32  
33 majority of staff. Most ophthalmologists (N=9) agreed it was more cost-effective  
34  
35 and a better use of their time if ECLOs helped to complete the CVI and  
36  
37 participate in the certification process. Although the ECLOs said they were often  
38  
39 used inconsistently by ophthalmologists.  
40  
41  
42  
43  
44

45 'I must say that ECLO was brilliant. She talked us through what  
46  
47 was going to happen, what we had to do, literally I didn't do much  
48  
49 after that... I literally came out of the door and met ECLO... That  
50  
51 made a huge difference to me.' (Pat23)  
52  
53  
54  
55  
56  
57  
58  
59  
60

1  
2 'ECLO offered help...gave me time to think about it...and I  
3  
4 needed time...she was very sympathetic and did her job  
5  
6 beautifully.' (Pat2)  
7  
8  
9

10 'I much prefer (sending patients to ECLO) because when you're  
11  
12 in a situation where you're seeing patients in clinical setting  
13  
14 you're under a lot of pressure because you've got a certain  
15  
16 number of patients to see and the time is ticking.' (Opt3)  
17  
18  
19

20  
21  
22 'Biggest positive for us has been the ECLO - irons out difficulties  
23  
24 in liaising with different agencies and informing the patients about  
25  
26 the benefits and the sources of help they can get. Made a big  
27  
28 difference in my practice.' (Ophth10)  
29  
30  
31

### 32 33 **The patient benefit of certification and registration** 34

35 The certification and registration processes were an emotionally overwhelming  
36  
37 time for almost all patients and they described the help they receive at this time  
38  
39 as substantially improving their lives. The support offered as a result of being  
40  
41 certified and registered changed lives and made patients more confident.  
42  
43  
44

45 'I used to sit crying a great deal before these things started  
46  
47 feeding through to me, from social services. I have a certain  
48  
49 amount of confidence back...I lost all of that at one time.' (Pat37)  
50  
51  
52

53 'It's all about confidence, my confidence went to zero. The more  
54  
55 things you can do for yourself, more confident with, makes your  
56  
57 life better.' (Pat23)  
58  
59  
60

1  
2  
3 The practical assistance that resulted from certified and registered was  
4  
5 also valued by patients;  
6  
7  
8  
9

10 'I faced my fear thinking I'd never walk in the dark anymore and  
11  
12 thanks to social services, they've trained me to walk in the dark.'  
13

14 (Pat14)  
15  
16  
17  
18

19 '[social services] issued me with bus pass, made me more  
20  
21 mobile, fold up white stick, recognition stick, helps an immense  
22  
23 amount.' (Pat31)  
24  
25  
26

### 27 **Improving the certification and registration process**

28  
29  
30

31 Suggestions to improve certification and registration included initiatives to  
32  
33 improve health professionals' level of awareness about the benefits of being  
34  
35 certified and registered. In one area studied, the SSD worked collaboratively  
36  
37 with consultants to improve patients' experiences of certification and  
38  
39 registration.  
40  
41  
42

43  
44 Greater use of the ECLO was also a common theme suggested to improve the  
45  
46 service. In one area social services said the number of incomplete forms  
47  
48 decreased since an ECLO was employed, stating that previously 10-15% CVIs  
49  
50 received would be sent back as they were incomplete. Ophthalmologists also  
51  
52 commented on the difference ECLOs make to providing accurate and detailed  
53  
54 information to patients.  
55  
56  
57  
58  
59  
60

1  
2 'I'm happy to provide what support I can but I'd readily agree that  
3  
4 I don't have the time and I don't think I'm as good as the ECLO  
5  
6 because I think most of us assume what patients want and need.  
7  
8 We spend our lives making decisions for them with our expertise  
9  
10 and experience...I don't have the time on the day...and the  
11  
12 ECLO does and so wonderfully.' (Ophth1)

13  
14  
15  
16  
17 In many areas the third sector played a key role in providing support to patients  
18  
19 who were extremely grateful for this assistance. Where support from SSDs took  
20  
21 longer to arrive, the role of the voluntary sector was invaluable.  
22  
23

24  
25  
26 'We contacted Action for Blind and they helped filled out forms  
27  
28 with... I've learned more from RNIB/Action than anyone else.'  
29  
30 (Pat39)

31  
32  
33 '...Age Concern was brilliant...people would be in a complete  
34  
35 panic quite honestly if you were on your own and you had to  
36  
37 come home on your own and then you suddenly got to cope with  
38  
39 all this stuff.' (Pat5)

## 40 41 42 43 **Discussion**

44  
45  
46 The current study examined the process of sight loss certification and  
47  
48 registration in three areas in England in order to identify potential barriers and  
49  
50 delays in timely certification and registration and possible options for improving  
51  
52 the service.  
53  
54  
55  
56  
57  
58  
59  
60

1  
2 Despite the ageing population and predicted increases in those with sight loss,  
3  
4 <sup>(17)</sup> the numbers of people certified each year with sight loss have declined in  
5  
6 recent years, with the exception of the 12-months from April 2011 to March  
7  
8 2012, which showed a marked increase on previous years. A significant  
9  
10 geographical variation also exists across England in certification rates of **severe**  
11  
12 **sight impairment** and sight impairment. <sup>(7)</sup> These variations in rates of  
13  
14 certification and registration have been attributed to differences in the level at  
15  
16 which certification is being offered, care pathways, perceived value of  
17  
18 certification and registration and payment for CVI forms. However, this  
19  
20 information is largely anecdotal and this is the only study to directly explore the  
21  
22 sight loss certification and registration pathways.  
23  
24  
25  
26  
27

28  
29 In our study, ophthalmologists revealed they are often uncertain as to when to  
30  
31 offer certification. For some patients it is clearly evident when their eye sight  
32  
33 has reached the point to be certified but for others deciding when to certify is  
34  
35 more ambiguous. Research finds higher under-registration in patients with  
36  
37 treatable disease compared to those with untreatable disease. <sup>(18)</sup> The  
38  
39 uncertainty of when to certify was also an issue for other eye conditions. <sup>(19)</sup> For  
40  
41 example, certifying patients with atrophic AMD also presents significant timing  
42  
43 difficulties. <sup>(20)</sup> These patients often experience severe sight loss after discharge  
44  
45 but need to be referred back into the hospital eye service for certification when  
46  
47 their vision declines. Introducing these patients to the ECLO/social services  
48  
49 team before they are discharged will improve their access to relevant support  
50  
51 services.  
52  
53  
54  
55  
56  
57  
58  
59  
60

1  
2  
3  
4  
5  
6  
7  
8  
9  
10  
11  
12  
13  
14  
15  
16  
17  
18  
19  
20  
21  
22  
23  
24  
25  
26  
27  
28  
29  
30  
31  
32  
33  
34  
35  
36  
37  
38  
39  
40  
41  
42  
43  
44  
45  
46  
47  
48  
49  
50  
51  
52  
53  
54  
55  
56  
57  
58  
59  
60

Some ophthalmologists are unclear of the purpose of certification which may affect when they offer it to patients. Consultants may delay certifying patients as they regard certification as the *end of a clinical process* and wait to certify patients until they think they cannot offer any further medical treatments.

Related to the issue of *when* to offer certification is the reason for offering it: the purpose of certification is to provide access to support for patients. Certification and registration are not simply medical processes but a significant step in patients' adjusting and accepting of their sight-loss. Interviews with patients revealed the issuing of certification is often viewed as the beginning of a new phase and a gateway to much needed support. In contrast, many ophthalmologists regard certification as the end of the process but this attitude can lead to patients needing support left without it.

There was variation in the certification process in each of the three areas and the process used by each consultant differed within hospitals. The Department of Health recommends the CVI be sent to the local social services department "within five working days".<sup>(21)</sup> Across the three areas, interviews with hospital and social services staff and patients revealed that only very rarely were CVIs sent to SSDs within five days. It was much more common for CVIs to take weeks or months to be sent to SSDs. Previous research also found that delays often occur when CVIs are sent to SSDs.<sup>(22)</sup> Each administrator (n=8) confirmed consultants can 'take a while' to return the CVI to their office. Another significant delay is sending incomplete CVIs to SSDs; an unnecessary delay for patients waiting for support.



1  
2 These practices lengthen the certification and registration processes, making it  
3  
4 more complicated and unnecessarily fraught for patients. In each of the three  
5  
6 areas studied, there were examples of good and bad practice and stories of  
7  
8 both grateful and frustrated patients, thus a good certification process is  
9  
10 achievable in every department.  
11  
12

13  
14  
15 A more holistic approach to eye health is needed; health professionals,  
16  
17 including registrars, ophthalmologists, optometrists and medical secretaries  
18  
19 should improve their awareness of when certification should be offered and how  
20  
21 certification benefits patients. Any additional time needed for CVI discussion in  
22  
23 clinic may not be readily available due to pressures on quantity (e.g. meeting  
24  
25 Referral to Treatment guidance and other performance targets), therefore  
26  
27 departments should explore if others, such as optometrists or ECLOs, are better  
28  
29 placed to complete parts of the CVI. It should also be considered who is best  
30  
31 placed to send completed CVIs quickly - ECLOs or secretaries or a designated  
32  
33 administrator/team.  
34  
35  
36  
37  
38  
39

40 Understanding how certification and registration operates at a local level will  
41  
42 help commissioners and clinicians better understand the reasons for the  
43  
44 variations in certification and registration rates and take steps to address the  
45  
46 inconsistencies. Quantifying the barriers to timely certification and registration,  
47  
48 and benchmarking against best practice will also help ensure the correct level of  
49  
50 service provision, enabling health and social care commissioners to deliver  
51  
52 consistent, high quality services based on an accurate assessment of need.  
53  
54  
55

### 56 57 **Limitations of research** 58 59 60

1  
2 The interviews include only those who were certified, further research could  
3  
4 examine patients who are eligible for certification but who either decline to be  
5  
6 certified or are not offered it by clinicians. In addition, as the research used  
7  
8 qualitative methods, we were able to interview a limited number of health and  
9  
10 social care professionals. Further research is needed to examine a wider range  
11  
12 of departments over a longer period of time. Research is also needed to  
13  
14 understand the impact of the Disability Living Allowance assessment policies  
15  
16 and whether there is any pressure on ophthalmologists not to certify patients.  
17  
18  
19  
20  
21  
22

23  
24 TB wrote the initial draft. All authors revised the initial draft, FG revised the  
25  
26 subsequent drafts. TB and SL wrote the final draft. TB is the guarantor. All  
27  
28 authors have full control of the content of the article.  
29  
30  
31  
32  
33  
34  
35  
36  
37  
38  
39  
40  
41  
42  
43  
44  
45  
46  
47  
48  
49  
50  
51  
52  
53  
54  
55  
56  
57  
58  
59  
60

**Competing interests:**

None.

**Acknowledgements:**

Many thanks to the health professionals, representatives from social services and patients who participated in the interviews and took great courage in providing honest feedback on their experiences of the C&R process. Many thanks to the advisory group who provided guidance and advice.

**References**

- 1 RNIB. *Vision criteria for registration*. RNIB, 2014.  
[http://www.rnib.org.uk/livingwithsightloss/registeringsightloss/Pages/vision\\_criteria.aspx](http://www.rnib.org.uk/livingwithsightloss/registeringsightloss/Pages/vision_criteria.aspx) (Accessed 18 January 2014).
- 2 Department of Health. *Public Health Outcomes Framework 2013 to 2016 and technical updates*. DH, 2013.  
<https://www.gov.uk/government/publications/healthy-lives-healthy-people-improving-outcomes-and-supporting-transparency> (Accessed 18 January 2014).
- 3 RNIB. *Sight loss UK 2012 - The latest evidence*. RNIB, 2012.  
[http://www.rnib.org.uk/aboutus/Research/reports/otherresearch/Pages/sight\\_loss\\_uk.aspx](http://www.rnib.org.uk/aboutus/Research/reports/otherresearch/Pages/sight_loss_uk.aspx) (Accessed 17 January 2014)
- 4 Leamon S. *Number of adults and children certified with sight impairment and severe sight impairment in England and Wales: April 2008 – March 2009*. RNIB, 2012.  
[http://www.rnib.org.uk/aboutus/Research/reports/otherresearch/Pages/sight\\_loss\\_statistics\\_report.aspx](http://www.rnib.org.uk/aboutus/Research/reports/otherresearch/Pages/sight_loss_statistics_report.aspx) (Accessed 17 January 2014)
- 5 Leamon S. *Number of adults and children certified with sight impairment and severe sight impairment in England and Wales: April 2011-March 2012*. RNIB, 2013.  
[http://www.rnib.org.uk/aboutus/Research/reports/otherresearch/Pages/sight\\_loss\\_statistics\\_report.aspx](http://www.rnib.org.uk/aboutus/Research/reports/otherresearch/Pages/sight_loss_statistics_report.aspx) (Accessed 17 January 2014)
6. The NHS Information Centre, Adult Social Care Team. *Registered Blind and Partially Sighted People Year ending 31 March 2011, England*. NHS Information Centre, 2011.  
<http://www.hscic.gov.uk/pubs/blindpartiallysighted11> (Accessed 17 January 2014)
7. Malik ANJ, Bunce C, Wormald R, Suleman M, Stratton I, Muir Gray JA. Geographical variation in certification rates of blindness and sight impairment in England, 2008–2009. *BMJ Open*. 2012; 2:e001496. doi:10.1136/bmjopen-2012-001496.
- 8 Britten N. Qualitative interviews in medical research. *BMJ* 1995; 311:251-3.
- 9 Boyce T. *The Certification and Registration Processes: Stages, barriers and delays*. RNIB, 2012.

- 1  
2 [http://www.rnib.org.uk/aboutus/Research/reports/earlyreach/Pages/certification\\_](http://www.rnib.org.uk/aboutus/Research/reports/earlyreach/Pages/certification_registration_processes.aspx)  
3 [registration\\_processes.aspx](http://www.rnib.org.uk/aboutus/Research/reports/earlyreach/Pages/certification_registration_processes.aspx) (Accessed 17 January 2014).
- 4 10 McGuire LC. Remembering what the doctor said: Organization and adults -  
5 memory for medical information. *Exp. Aging Res* 1996;22:403–428.
- 6 11 McLean RJ, Windridge KC, Gottlob. Living with nystagmus: A qualitative  
7 study. *Br J Ophthalmol* 2012;96:981-986 doi:10.1136/bjophthalmol-2011-  
8 301183
- 9 12 Office for National Statistics. *Annual Mid-year Population Estimates, 2011*  
10 *and 2012*. ONS, 2013.
- 11 [http://www.ons.gov.uk/ons/rel/pop-estimate/population-estimates-for-uk--](http://www.ons.gov.uk/ons/rel/pop-estimate/population-estimates-for-uk--england-and-wales--scotland-and-northern-ireland/mid-2011-and-mid-2012/stb--mid-2011---mid-2012-uk-population-estimates.html#tab-Mid-2011-and-mid-2012-UK-population-estimates-)  
12 [england-and-wales--scotland-and-northern-ireland/mid-2011-and-mid-2012/stb--](http://www.ons.gov.uk/ons/rel/pop-estimate/population-estimates-for-uk--england-and-wales--scotland-and-northern-ireland/mid-2011-and-mid-2012/stb--mid-2011---mid-2012-uk-population-estimates.html#tab-Mid-2011-and-mid-2012-UK-population-estimates-)  
13 [-mid-2011---mid-2012-uk-population-estimates.html#tab-Mid-2011-and-mid-](http://www.ons.gov.uk/ons/rel/pop-estimate/population-estimates-for-uk--england-and-wales--scotland-and-northern-ireland/mid-2011-and-mid-2012/stb--mid-2011---mid-2012-uk-population-estimates.html#tab-Mid-2011-and-mid-2012-UK-population-estimates-)  
14 [2012-UK-population-estimates-](http://www.ons.gov.uk/ons/rel/pop-estimate/population-estimates-for-uk--england-and-wales--scotland-and-northern-ireland/mid-2011-and-mid-2012/stb--mid-2011---mid-2012-uk-population-estimates.html#tab-Mid-2011-and-mid-2012-UK-population-estimates-) (Accessed 17 January 2014).
- 15 13 Office for National Statistics. *Population Estimates by Ethnic Group:*  
16 *Methodology Paper*. ONS, 2011.
- 17 [http://www.ons.gov.uk/ons/taxonomy/index.html?nscl=Population+Estimates+by](http://www.ons.gov.uk/ons/taxonomy/index.html?nscl=Population+Estimates+by+Ethnic+Group)  
18 [+Ethnic+Group](http://www.ons.gov.uk/ons/taxonomy/index.html?nscl=Population+Estimates+by+Ethnic+Group) (Accessed 17 January 2014)
- 19 14 Miles MB, Huberman AM. *Qualitative data analysis: An expanded*  
20 *sourcebook (Second Edition)*. London: Sage Publications; 1994.
- 21 15 Morse JM, Field PA. *Qualitative research methods for health professionals*  
22 *(Second Edition)*. London: Sage Publications; 1995.
- 23 16 Maxwell JA. *Qualitative research design. An interactive approach (Second*  
24 *edition)*. London: Sage Publications; 2005.
- 25 17 Leamon S. *Number of adults and children certified with sight impairment in*  
26 *England and Wales: April 2011-March 2012*. RNIB, 2013.
- 27 [http://www.rnib.org.uk/aboutus/Research/reports/otherresearch/Pages/sigh](http://www.rnib.org.uk/aboutus/Research/reports/otherresearch/Pages/sight_loss_statistics_report.aspx)  
28 [t\\_loss\\_statistics\\_report.aspx](http://www.rnib.org.uk/aboutus/Research/reports/otherresearch/Pages/sight_loss_statistics_report.aspx) (Accessed 17 January 2014).
- 29 18 Kotecha A, Fernandes S, Bunce C, Franks WA. Avoidable sight loss from  
30 glaucoma: is it unavoidable? *Br J Ophthalmol* 2012;96:816e820.  
31 doi:10.1136/bjophthalmol-2012-301499
- 32 19 Barry RJ, Murray PI. Unregistered visual impairment: is registration a failing  
33 system? *Br J Ophthalmol* 2005;89:995e8
- 34 20 Rostron E, McKibbin M. Visual impairment certification secondary to ARMD  
35 in Leeds, 2005–2010: is the incidence falling? *Eye* 2012;26:933-936.
- 36 21 Department of Health. *Certificate of Vision Impairment Explanatory Notes for*  
37 *Consultant Ophthalmologists and Hospital Eye Clinic Staff*.  
38 [https://www.gov.uk/government/uploads/system/uploads/attachment\\_data/file/1](https://www.gov.uk/government/uploads/system/uploads/attachment_data/file/127399/CVI-Explanatory-notes-in-DH-template.pdf.pdf)  
39 [27399/CVI-Explanatory-notes-in-DH-template.pdf.pdf](https://www.gov.uk/government/uploads/system/uploads/attachment_data/file/127399/CVI-Explanatory-notes-in-DH-template.pdf.pdf) (Accessed 17 January  
40 2014).
- 41 22 Bunce C, Smyth L, Xing W, Zekite A (ND) *Research into drop in registrations*  
42 *of blind and partially sighted people*. (Supplied by first author, available from  
43 TB).
- 44  
45  
46  
47  
48  
49  
50  
51  
52  
53  
54  
55  
56  
57  
58  
59  
60
